# Supplementary material
Source: PubMed Central journal article supplement (PMC3387065)
Supplement: 1202810109_sapp.pdf [file 1202810109_sapp.pdf]

## Supplementary Information

### Supplementary Discussion

One caveat of using Akt activator as a drug for neurological disorders is that hyperactivation of Akt signaling may induce cancer. Nevertheless, induction of cancer by elevating PtdIns(3,4,5)P3/Akt signaling is a progressive process and usually takes several months or even years. For example, in myeloid-specific PTEN knockout mice, we could not find any tumor until 3 months after the birth. When used as a suppressor of neuronal death caused by glutamate-excitotoxicity, Akt activator will only be given for several days, even several hours; thus it is unlikely that this type of treatment will lead to tumorigenesis. Interestingly, it was recently reported that activation of Akt1 decreases mammary epithelial cell migration, and Akt1 prevents an epithelial-to-mesenchymal transition that resembles events required for metastasis (1, 2). Another report showed that in some acute myeloid leukemia (AML), activation of Akt surprisingly reduced leukemic cell growth by inhibiting FOXO (3), suggesting that Akt activator can even potentially be used to treat certain cancers.

Akt is also a key enzyme involved in other processes such as cell migration, immune cell activation, embryonic development, hematopoietic and mesenchymal differentiation, and glucose homeostasis, thus SC79 may potentially be used to modulate cell function in other physiological and pathological situations such as wound healing, host defense, and blood glucose control in diabetes. For example, SC79 may have a potential benefit in regulating glucoregulatory responses and insulin sensitivity in type 1 and 2 diabetes. Phosphorylation and deactivation of GSK3b promotes glycogen synthesis resulting in decreased blood glucose. Akt-mediated GLUT4 translocation mediates glucose transport. GSK3b and FOXO also play a role in expression of genes in gluconeogenesis like G6Pase and PEPCK(4). In innate immunity, activating neutrophil functions by elevating PI3K/Akt pathway using PTEN inhibitor has been previously reported (5). SC79 may also offer similar effect by directly activating Akt. In addition, SC79 may also be effective in preventing myocardial infarction in heart attack, in which the acquired resistance to apoptosis is mediated at least in part by the sustained activation of Akt. Use of SC79 could exert a wide range of cardio-protective effects in myocardial ischemia/reperfusion-induced injury, myocardial hypertrophy, hypertension and vascular diseases by suppressing cell death and inducing angiogenesis by regulating eNOS.

### Supplementary Methods

#### **A cell-based screening system for detection of Akt plasma membrane translocation.**

Activation of PtdIns(3,4,5)P3/Akt pathway relies on PtdIns(3,4,5)P3-mediated plasma membrane translocation of Akt. To visualize the Akt membrane translocation in intact cells, we used the PH-domain of Akt (PH<sub>Akt</sub>) fused with green fluorescent protein (PH<sub>Akt</sub>-GFP) as a marker for this event. The 120 amino acids PH domain is from human Akt1 and specifically bind to PtdIns(3,4,5)P3. Overnight starvation in serum-free medium abolished PH<sub>Akt</sub>-GFP membrane localization in unstimulated cells (Figure S1). Subsequent PH<sub>Akt</sub>-GFP membrane translocation was triggered by the addition of insulin growth factor (IGF) (100 ng/ml). In the experiment described in Figure S1, we utilized transient transfection to deliver PH<sub>Akt</sub>-GFP construct. Although we were able to detect robust membrane translocation of PH<sub>Akt</sub>-GFP, variable transfection efficiency and levels of recombinant protein expression could be problematic for high-throughput screening. To circumvent this problem, we generated a stable cell line expressing PH<sub>Akt</sub>-GFP fusion protein. These cells were healthy and IGF-elicited PH<sub>Akt</sub>-GFP membrane translocation could be easily detected as described in Figure S1 (Figure S2). More

importantly, the expression level of PH<sub>Akt</sub>-GFP fusion protein was almost the same in each individual cell, thus making the automatic imaging analysis feasible.

### **Screening for inhibitors of Akt plasma membrane translocation.**

To validate our cell based assay for high throughput screening, we first conducted a pilot screening using a bioactive compound library (approximately 3000 compounds). The screening was performed at the Institute for Chemistry and Cell Biology (ICCB) at Harvard Medical School. Every step of the experiment was handled in a high throughput mode (Figure S3). Based on our preliminary data, we incubated cells which have been serum-starved (0.1% serum) for overnight with chemical compounds for 30 min before inducing PH<sub>Akt</sub>-GFP membrane translocation with IGF. Our goal is to identify compounds which directly inhibit PtdIns(3,4,5)P3/Akt signaling pathway. Thus, we chose to use short incubation time to exclude compounds which indirectly block GFP-PH membrane translocation (e.g. via affecting transcription or translation). From the pilot screening, we identified 21 positive hit compounds (Figure S4 and Table S1). As expected, several known PI3 kinase inhibitors and compounds that nonspecifically inhibit PI3 kinase activity were identified as positive hit compounds, validating our strategy and method for high throughput screening.

We then carried out the high throughput screening using several synthetic compound libraries. The ICCB compounds are from a variety of sources including commercial libraries from ChemBridge, ChemDiv, Bionet, Maybridge, Peakdale, and CEREP, NIH-NCI collections, libraries that result from diversity-oriented organic synthesis (DOS), known bioactive compounds, and historic collections of compounds resulting from different synthetic strategies. When ICCB purchased compound libraries, they selected collections that are enriched for complex heterocyclic compounds and compounds of higher molecular weight (an average mw of ~350-400 Daltons) because these types of compounds are more likely to provide interesting hits in high throughput screens. In addition, they sought to minimize the number of potentially “bad” compounds, those with groups that might make them unstable or toxic. In particular, they eliminated unstable imines, compounds with free carboxyl groups, and compounds with building block elements that might chelate metals. Table S2 is a list of libraries used for current screening, which include more than 60,000 synthetic compounds.

The high throughput screening was performed twice to minimize the number of false positive hit compounds. From the first screening, we identified about 446 positive hit compounds and 125 of them were confirmed in the second screening (Table S3 and Figure S5). We later found that 25 of the positive compounds could generate auto-florescence and their effect on PH-Akt membrane translocation was in fact of the result of the greatly enhanced background florescence (Table S3).

### **Confirmation of the positive hits by time-lapse fluorescent imaging.**

In this study, more than 60,000 chemical compounds were screened and it is difficult to titrate the optimal concentration of each compound. The compound stocks were stored at 5 mg/ml in DMSO. In our screen, 100 nl of compound stock was transferred into a 50  $\mu$ l assay volume, resulting in a final concentration of 20  $\mu$ M for a compound of 500 Daltons. This is a generally utilized concentration at ICCB. One potential problem of our screening assay is that the transferred compounds may not be able to diffuse evenly in each well due to the relatively short incubation time. Thus, the effect of some positive hit compounds on PH-Akt membrane translocation could be result of very high local concentration. In order to select the most potent compounds for further characterization, we conducted dose-ranging experiments using live cells cultured in 35-mm plate.

The initial 125 positive hit compounds identified after the second screening (**Figure S5**) were purchased from ChemBridge, ChemDiv, or Maybridge. The fresh stock solution was freshly prepared in DMSO (5 mg/ml). This stock solution was directly added to culture medium to yield three different final concentrations (4, 8, 16  $\mu$ g/ml). For time-lapse live cell imaging, HeLa-PH-EGFP cells were plated into a 35-mm glass-bottom dish (MatTek) and cultured for 24 to 48 hours. Cells were serum-starved in 2 mL Leibovitz L15 medium for 1 to 2 h and the medium was replaced with 1 mL of fresh serum-free Leibovitz

L15 medium containing a desired concentration of each compound. After 30 min pre-incubation, IGF1 (5 ng/mL) was added and images were taken every 5 to 10 min under a 40× oil objective lens. The relative fluorescent intensity at the membrane versus adjacent cytoplasm was determined. The compounds that led to a greater than 75% inhibition of PH-EGFP membrane translocation at or below 16 µg/ml were identified and designated as the confirmed hits. The representative live images and structure of 55 confirmed hit compounds were shown in **Figure S6** and **Figure S7**.

### **SC79-induced cytosolic phosphorylation of Akt analyzed by western blotting.**

Hela cells were serum starved for 1 hr and treated with IGF (100ng/ml) or SC79 (4 µg/ml) for 30 minutes. Cells were lysed in Lysis buffer containing 250 mM Sucrose, 20 mM HEPES, 10 mM KCl, 1.5 mM MgCl<sub>2</sub>, 1 mM EDTA, 1 mM EGTA supplemented with protease inhibitors. Cells were passed through 25G needle several times and kept on ice for 20 minutes. Total cell lysate was taken at this point. Cell lysates were centrifuged at 100,000g for 30 minutes. Supernatant was collected as the cytosolic fraction. Pellet was washed with lysis buffer and represents the membrane fraction. Total cell lysate, cytosolic and membrane fractions were resolved by SDS-PAGE and analyzed for phospho-Akt (S473), Total Akt, Tubulin (cytosolic marker) and Orail (membrane marker) by western blotting.

### **MTT (3-(4,5-Dimethylthiazol-2-yl)-2,5-diphenyltetrazolium bromide) assay for cell viability.**

HsSultan or NB4 cells ( $2.5 \times 10^5$ ) were plated in a 24-well plate in 500 µL of phenol red-free RPMI medium supplemented with 10% FBS. After incubation for 24 hours, each compound (8 µg/ml) was added and cultured for overnight (16–20 h). Fifty microliters of MTT solution (5 mg/mL in PBS) were added to each well. Following 2 hrs incubation, the purple formazan crystals were dissolved by directly adding in 500 µL of isopropanol with 0.1 M HCl to each well. After clearing the cell debris by centrifugation, the absorbance was measured at a wavelength of 570 nm.

### ***In silico* docking**

*In silico* docking calculations were carried out using AutoDock Vina (6) as described elsewhere (7). Three dimensional crystal structures of Protein Kinase B/Akt PH domain unbound form (RCSB PDB ID: 1UNR) and inositol-(1,3,4,5)-tetrakisphosphate (IP4) bound form (RCSB PDB ID: 1UNQ) were retrieved from Protein Data Bank corrected for bond order and orientation with application of proper protonation states used in docking experiments using MGLTools (v1.5.4) (8). Structural coordinates of ligand SC79 were generated using Sybyl sketcher module (9) and energy minimized using a standard Tripos forcefield (TRIPOS, St. Louis, MI) that employs Powell minimization and simplex optimization with the distance dielectric function and an energy gradient of 0.05 Kcal/Mol Å with application of Gasteiger charges. Docking of SC79 onto proteins 1UNR and 1UNQ was carried out with similar grid dimension of 100 Å × 100 Å × 100 Å. A local optimization and exhaustive search was carried out by docking algorithm to find and cluster best docked poses of SC79 onto protein structures. Similar docking parameters were applied in both the cases. The best 9 lowest-energy docked poses were identified and analyzed. Ligand IP4 was also docked onto ligand free Akt PH domain structure. As a validation to the applied parameters, native ligand IP4 was redocked onto bound PH domain structure that resulted in binding to similar pocket with a RMSD of 0.9581Å. Figures were generated using program PyMOL (DeLano Scientific, LLC, San Carlos, CA, USA).

A flexible grid-based SC79-PH domain docking protocol defined 9 clustered poses for the PH domain bound to SC79. Figure 3D illustrates best docked pose of SC79 onto unbound PH domain that possessed ΔG of -5.6 kcal/mol. This pose identified residue Arg25 within binding site which exhibits numerous interactions with the ligand SC79 including hydrogen bond interaction. Results demonstrate that SC79 binds to the similar pocket in unbound PH domain structure as was reported a IP4 binding site in bound PH domain structure. This prompted us to investigate about the IP4 binding pocket in unbound PH domain. Interestingly, IP4 binding site resembles the SC79 binding site in unbound PH domain (Figure 3D, *left panel*). The SC79 and IP4 ligands compete with each other to occupy a similar binding

site onto PH domain. SC79 docking onto IP4 bound PH domain resulted in yielding alternate binding pockets of SC79 other than noted above (Figure 3D). Taken together, these docking analyses suggest that SC79 binds to PH domain. SC79 binding to IP4 bound PH domain may result in a weaker affinity complex.

### **Circular Dichroism (CD)**

Far-UV CD (260-195 nm) was carried out at 25 °C on a Jasco-810 spectropolarimeter (Jasco, Easton, MD) purged with nitrogen gas. Data were acquired in 1-mm quartz cuvette with 1-nm bandwidth, 2-s response time, 10 nm/min scan speed, and four scans. Pure N-terminal 6His-tagged recombinant full length Human Akt1 was purchased from Millipore ([www.millipore.com/catalogue/item/14-279](http://www.millipore.com/catalogue/item/14-279)). Chemically synthesized and purified SC79 was purchased from ChemBridge. Protein and ligand samples were prepared in 50 mM Tris pH 7.5, 150 mM NaCl. Akt1 was incubated with SC79 at 37 °C for 30 min. Data sets were acquired in duplicate. Percent secondary structure was determined using programs K2D (<http://www.embl.de/~andrade/k2d.html>) and K2D2 (<http://www.ogic.ca/projects/k2d2/>).

**Neuronal cell cultures and Cytotoxicity** Primary cortical or hippocampal neuronal cultures were prepared as previously described (10). To induce excitotoxicity, the cells were prewashed with Tris-buffered control salt (CSS) solution (120 mM NaCl, 5.4 mM KCl, 1.8 mM CaCl<sub>2</sub>, 25 mM Tris-HCl, pH 7.4, and 15 mM glucose) and treated with CSS containing 50 µM glutamate for 40 min, followed by 4 hr recovery in regular culture medium. SC79 (4 µg/ml) was given 15 min before and during glutamate treatment. Toxicity was assayed 4 h after glutamate exposure by microscopic examination with computer-assisted cell counting. Total and dead cells were determined by nuclei staining with Hoechst (0.5 ng/ml) and propidium iodide (1 µg/ml), respectively. After 20 min incubation, the cells were examined under a fluorescence microscope with excitation at 360 nm. Cell death was determined as the ratio of dead-to-total cell number and quantified by counting 1,000 cells.

### **Permanent focal cerebral ischemia model**

This study was conducted in accordance with the Animal Welfare Guidelines of Tokai University School of Medicine, Japan. The permanent focal cerebral ischemia was induced by middle cerebral artery occlusion (MCAO) essentially as described previously(11). Briefly, mice (C57 Black/6) weighing 17–25 g were anesthetized with 4% isoflurane/66% N<sub>2</sub>O/30% O<sub>2</sub> and maintained with 1.5% isoflurane. Permanent focal ischemia was achieved as follows: a 2-mm hole was drilled at a site superior and lateral to the left foramen ovale to expose the left middle cerebral artery. The proximal portion of the left middle cerebral artery (MCA) was permanently occluded over a 1-mm segment distal to the origin of the lenticulostriate branches through the use of a bipolar coagulator (12). SC79 was injected intraperitoneally (0.04 mg/g mouse body weight) 5 min before permanent MCAO (Figure 4E). In another experiment, extra SC79 was injected (0.04 mg/g mouse body weight, once per hour for 6 hours) (Figure 4F).

### **Akt activation in the brain assessed by immunohistochemistry**

The mouse brains were perfused from the apex of the heart with PBS and perfusion-fixed with 4% paraformaldehyde in PBS. They were then immersion-fixed overnight at 4°C in 4% paraformaldehyde with rocking and subsequently cryoprotected in 10% (2 hours), 15% (2 hours), 20% (2 hours), and 25% (overnight) sucrose in PBS at 4°C. The slices were then embedded in OCT compound (Miles Scientific) and quickly frozen in isopentane. Coronal frozen sections (10-µm) were prepared on a cryostat and stored at -80 °C until use. The frozen sections were thawed, washed three times in PBS, permeabilized with 0.1% Triton X-100/PBS at room temperature for 5 min, and then blocked in 5% skim milk/3% BSA/PBS for 60 min. Total and phosphorylated Akt/PKB were detected using anti-Akt and anti-Phospho-Akt (Ser473) antibodies (Cell Signaling.), respectively. The slides were incubated with primary antibodies (1:200) at 4 °C overnight, and with the secondary antibodies at room temperature for 2 h, and immunoreactivity visualized by the ABC method (10).

## References

1. Yoeli-Lerner M, *et al.* (2005) Akt blocks breast cancer cell motility and invasion through the transcription factor NFAT. *Mol Cell* 20(4):539-550.
2. Manning BD, *et al.* (2005) Feedback inhibition of Akt signaling limits the growth of tumors lacking Tsc2. *Genes Dev* 19(15):1773-1778.
3. Sykes SM, *et al.* (2011) AKT/FOXO Signaling Enforces Reversible Differentiation Blockade in Myeloid Leukemias. *Cell* 146(5):697-708.
4. Wymann MP & Schneider R (2008) Lipid signalling in disease. *Nat Rev Mol Cell Biol* 9(2):162-176.
5. Li Y, *et al.* (2011) Pretreatment with phosphatase and tensin homolog deleted on chromosome 10 (PTEN) inhibitor SF1670 augments the efficacy of granulocyte transfusion in a clinically relevant mouse model. *Blood* 117(24):6702-6713.
6. Trott O & Olson AJ (AutoDock Vina: improving the speed and accuracy of docking with a new scoring function, efficient optimization, and multithreading. *J Comput Chem* 31(2):455-461.
7. Sharma AK, *et al.* (Solution structure of the guanine nucleotide-binding STAS domain of SLC26-related SulP protein Rv1739c from Mycobacterium tuberculosis. *J Biol Chem* 286(10):8534-8544.
8. Sanner MF (1999) Python: a programming language for software integration and development. *J Mol Graph Model* 17(1):57-61.
9. SYBYL 8.0 TI, 1699 South Hanley Rd., St. Louis, Missouri, 63144, USA. (SYBYL 8.0, Tripos International, 1699 South Hanley Rd., St. Louis, Missouri, 63144, USA.
10. Luo HR, *et al.* (2003) Akt as a mediator of cell death. *Proc Natl Acad Sci U S A* 100(20):11712-11717.
11. Kawada H, *et al.* (2006) Administration of hematopoietic cytokines in the subacute phase after cerebral infarction is effective for functional recovery facilitating proliferation of intrinsic neural stem/progenitor cells and transition of bone marrow-derived neuronal cells. *Circulation* 113(5):701-710.
12. Zhang F & Iadecola C (1992) Stimulation of the fastigial nucleus enhances EEG recovery and reduces tissue damage after focal cerebral ischemia. *J Cereb Blood Flow Metab* 12(6):962-970.

**Table S1.** Positive hit bioactive compounds identified from the pilot screening.

| Plate # | Well # | Name                        | Target or biological activity                               | Molecular formula | Molar weight | Source    |
|---------|--------|-----------------------------|-------------------------------------------------------------|-------------------|--------------|-----------|
| 500     | E17    | Ciprofloxacin hydrochloride | Antibiotics; Inhibit bacterial DNA rewind                   | C17N3O3F          | 312.99234    | NINDS     |
| 500     | F15    | Econazole nitrate           | Antifungal drug; Inhibit fungal cell membranes              | C18H15N2OCI3      | 380.02496    | NINDS     |
| 500     | H18    | Miconazole nitrate          | Antifungal drug; Inhibit fungal cell membranes              | C18H14N2OCI4      | 413.98596    | NINDS     |
| 500     | I15    | Gossypol                    | Polyphenols; Inhibitor of dehydrogenases                    | C30H30O8          | 518.1939     | NINDS     |
| 500     | M20    | Tamoxifen citrate           | Competitive antagonist of estrogen receptor                 | C26H29NO          | 371.2248     | NINDS     |
| 500     | B13    | Gentian violet              | Antifungal and bactericidal agent                           | C25H30N3I+        | 372.2439     | NINDS     |
| 500     | K11    | Centrimonium bromide        | Antiseptic agent; Cationic surfactants                      | C19H42N1+         | 284.33173    | NINDS     |
| 500     | O8     | Phenylmercuric acetate      | Fungicide; Herbicide                                        | C8H8O2Hg          | 338.023      | NINDS     |
| 1362    | I17    | NSC-95397                   | Inhibitor of Cdc25 dual specificity phosphatases            | C14H14O4S2        | 310.03336    | BIOMOL    |
| 1362    | K19    | BAY 11-7082                 | Inhibitor of NF kappa B activation                          | C10H9NO2S         | 207.0354     | BIOMOL    |
| 1362    | N13    | Wortmannin                  | Inhibitor of phosphoinositide 3 kinases                     | C23H24O8          | 428.1471     | BIOMOL    |
| 501     | E17    | Merbromin                   | Antiseptic agent                                            | C20O6Br2Hg2-      | 695.77686    | NINDS     |
| 500     | E16    | Hexylresorcinol             | Antiseptic and antihelmintic agent                          | C12H18O2          | 194.13069    | NINDS     |
| 501     | B08    | Cetylpyridinium chloride    | Antiseptic and antibacterial agent                          | C21H38N1+         | 304.3004     | NINDS     |
| 1362    | E19    | Ro 31-8220                  | Selective PKC inhibitor                                     | C25H23N5O2S       | 457.15714    | BIOMOL    |
| 1362    | J07    | Staurosporine               | ATP-competitive protein kinase inhibitor                    | C28H26N4O3        | 466.53       | BIOMOL    |
| 503     | G17    | Harmalol hydrochloride      | Alkaloids from plants                                       | C12H12N2O         | 200.09496    | NINDS     |
| 502     | D20    | Celastrol                   | Antioxidant and anti-inflammatory agent                     | C28H36O4          | 436.2613     | NINDS     |
| 1569    | L10    | Ellipticine                 | Anticancer agent; Binds to topoisomerase II                 | C17H14N2          | 246.11569    | Prestwick |
| 1362    | F09    | Quercetin dihydrate         | Antioxidant flavonoid; Inhibitor of cAMP-phosphodiesterases | C15O7             | 291.9644     | BIOMOL    |
| 1362    | M5     | LY294002                    | Inhibitor of phosphoinositide 3 kinases                     | C19H17NO3         | 307.343      | BIOMOL    |

**Table S2.** Compound libraries used for primary and secondary screenings.

|                                      | <b>Library name</b>          | <b># of Compounds</b> | <b>Plate Numbers</b> | <b># of Plates</b> |
|--------------------------------------|------------------------------|-----------------------|----------------------|--------------------|
| <b>Bioactive</b>                     | Biomol ICCB Known Bioactives | 480                   | 1361-1362            | 2                  |
| <b>Compounds</b>                     | NINDS Custom Collection      | 1,040                 | 500-503              | 4                  |
|                                      | Prestwick 1 Collection       | 1,120                 | 1568-1571            | 4                  |
| <b>Synthetic</b><br><b>Compounds</b> | ChemBridge 3                 | 19,560                | 1577-1606            | 30                 |
|                                      | ChemDiv 4                    | 14,677                | 1607-1648            | 42                 |
|                                      | Maybridge 5                  | 3,212                 | 1661-1670            | 10                 |
|                                      | ChemDiv 3                    | 16,544                | 1473-1519            | 47                 |
|                                      | Maybridge 1                  | 8,800                 | 542-563              | 22                 |
|                                      | Total number of chemicals    | 65433                 |                      |                    |

Table S3. Positive hit compounds identified from the primary and secondary screenings.

| ID   | Plate/Well # | Source | Reagent Source ID | Mol. Formula        | Mol. Weight                                                                    | PubChem CID | Autofluorescence                                      | Toxicity | ID   |
|------|--------------|--------|-------------------|---------------------|--------------------------------------------------------------------------------|-------------|-------------------------------------------------------|----------|------|
| SC1  | 545          | H12    | Maybridge         | Maybridge BTB 06587 | C <sub>9</sub> NO <sub>4</sub>                                                 | 191         | 2799766                                               |          | SC1  |
| SC2  | 550          | I05    | Maybridge         | Maybridge CD 08589  | C <sub>9</sub> H <sub>4</sub> N <sub>5</sub> O <sub>4</sub> SF <sub>3</sub>    | 335         | 2805154                                               |          | SC2  |
| SC3  | 550          | O05    | Maybridge         | Maybridge CD 08635  | C <sub>16</sub> H <sub>22</sub> N <sub>2</sub> O <sub>2</sub> S <sub>2</sub>   | 338         | 2805164                                               |          | SC3  |
| SC4  | 554          | P07    | Maybridge         | Maybridge KM 02595  | C <sub>8</sub> H <sub>13</sub> NO <sub>2</sub> S <sub>3</sub>                  | 251         | 2778657                                               |          | SC4  |
| SC5  | 554          | P22    | Maybridge         | Maybridge KM 03776  | C <sub>12</sub> H <sub>13</sub> NO <sub>3</sub> S <sub>2</sub>                 | 283         | 2820297                                               | *        | SC5  |
| SC6  | 558          | H11    | Maybridge         | Maybridge RDR 03078 | C <sub>6</sub> H <sub>12</sub> N <sub>2</sub> S <sub>2</sub>                   | 176         | 167013; 167304; 123256; 105062; 522634; 313; 10313041 |          | SC6  |
| SC7  | 561          | H02    | Maybridge         | Maybridge S 02113   | C <sub>14</sub> H <sub>15</sub> NO <sub>2</sub>                                | 229         | 300890                                                |          | SC7  |
| SC8  | 561          | K13    | Maybridge         | Maybridge RJC 03273 | C <sub>7</sub> H <sub>5</sub> O <sub>2</sub> Br                                | 200         | 2729629                                               |          | SC8  |
| SC9  | 1476         | B07    | ChemDiv           | ChemDiv 2548-0771   | C <sub>18</sub> H <sub>19</sub> NO <sub>5</sub>                                | 329         | 4606022                                               |          | SC9  |
| SC10 | 1477         | C02    | ChemDiv           | ChemDiv 3182-0185   | C <sub>13</sub> H <sub>21</sub> N <sub>2</sub> S <sub>2</sub> <sup>1+</sup>    | 269         | 5475033; 5749630; 102370; 7015549                     | *        | SC10 |
| SC11 | 1478         | C16    | ChemDiv           | ChemDiv 3448-1880   | C <sub>18</sub> H <sub>14</sub> N <sub>2</sub> O <sub>5</sub>                  | 338         | 1917689; 703540; 1917688                              | *        | SC11 |
| SC12 | 1479         | N21    | ChemDiv           | ChemDiv 3888-0510   | C <sub>17</sub> H <sub>13</sub> NO <sub>3</sub> S                              | 311         | 5724532; 6740709; 5398661                             |          | SC12 |
| SC13 | 1481         | H17    | ChemDiv           | ChemDiv 4340-1702   | C <sub>21</sub> H <sub>17</sub> N <sub>2</sub> O <sub>3</sub> SBr              | 456         | 1337448; 1337447                                      |          | SC13 |
| SC14 | 1481         | H22    | ChemDiv           | ChemDiv 4379-0593   | C <sub>16</sub> H <sub>12</sub> N <sub>2</sub> O <sub>2</sub> S <sub>4</sub>   | 388         | 2194030                                               | *        | SC14 |
| SC15 | 1483         | O06    | ChemDiv           | ChemDiv 4663-0305   | C <sub>12</sub> H <sub>7</sub> O <sub>2</sub> Br                               | 262         | 749613                                                |          | SC15 |
| SC16 | 1490         | I04    | ChemDiv           | ChemDiv 6234-0158   | C <sub>17</sub> H <sub>17</sub> N <sub>4</sub> S <sub>2</sub> F                | 360         | 7045555; 3357152; 7127443                             |          | SC16 |
| SC17 | 1491         | N08    | ChemDiv           | ChemDiv 6658-0003   | C <sub>23</sub> H <sub>28</sub> N <sub>2</sub> O                               | 348         | 2952775; 961714; 961713                               |          | SC17 |
| SC18 | 1491         | N15    | ChemDiv           | ChemDiv 6623-0252   | C <sub>15</sub> H <sub>17</sub> NO                                             | 227         | 781226; 2063512; 781227                               | *        | SC18 |
| SC19 | 1498         | A09    | ChemDiv           | ChemDiv C301-2030   | C <sub>4</sub> N <sub>2</sub> OCl <sub>2</sub>                                 | 282         | 584802                                                |          | SC19 |
| SC20 | 1498         | G02    | ChemDiv           | ChemDiv C301-3578   | C <sub>4</sub> NO <sub>2</sub> Cl                                              | 249         | 768385                                                |          | SC20 |
| SC21 | 1498         | I18    | ChemDiv           | ChemDiv C306-0545   | C <sub>25</sub> H <sub>13</sub> O <sub>2</sub> S                               | 407         | 6621759                                               |          | SC21 |
| SC22 | 1511         | J19    | ChemDiv           | ChemDiv K788-0502   | C <sub>26</sub> N <sub>2</sub> O <sub>2</sub> S                                | 404         | 4058887                                               |          | SC22 |
| SC23 | 1515         | D07    | ChemDiv           | ChemDiv 7286-2245   | C <sub>15</sub> H <sub>14</sub> N <sub>4</sub> O <sub>3</sub> S                | 326         | 970664                                                |          | SC23 |
| SC24 | 1515         | M03    | ChemDiv           | ChemDiv E746-0124   | C <sub>18</sub> H <sub>19</sub> N <sub>3</sub> O <sub>2</sub> S                | 337         | 6624952                                               |          | SC24 |
| SC25 | 1517         | D06    | ChemDiv           | ChemDiv D053-0021   | C <sub>13</sub> H <sub>11</sub> N <sub>3</sub> O <sub>4</sub> SCl <sub>2</sub> | 375         | 2987701                                               |          | SC25 |
| SC26 | 1577         | C20    | ChemBridge        | 5106399             | C <sub>13</sub> H <sub>9</sub> NO <sub>4</sub>                                 | 243         | 2192517                                               |          | SC26 |
| SC27 | 1577         | D22    | ChemBridge        | 5193093             | C <sub>10</sub> H <sub>7</sub> NOS                                             | 189         | 1626686; 2832913                                      |          | SC27 |
| SC28 | 1578         | B03    | ChemBridge        | 5140994             | C <sub>8</sub> H <sub>8</sub> N <sub>4</sub>                                   | 160         | 6787450; 6863956; 5544086                             | *        | SC28 |
| SC29 | 1578         | B09    | ChemBridge        | 5214970             | C <sub>15</sub> H <sub>17</sub> NO                                             | 227         | 781226; 2063512; 781227                               | *        | SC29 |
| SC30 | 1578         | B15    | ChemBridge        | 5216515             | C <sub>10</sub> H <sub>13</sub> O <sub>2</sub> Br                              | 244         | 787529                                                |          | SC30 |
| SC31 | 1578         | F19    | ChemBridge        | 5260273             | C <sub>16</sub> H <sub>23</sub> NO <sub>2</sub>                                | 261         | 792319; 792320; 2838039                               |          | SC31 |
| SC32 | 1578         | I07    | ChemBridge        | 5115555             | C <sub>27</sub> H <sub>35</sub> N <sub>5</sub> S                               | 461         | 6759337; 1377982; 5717379; 2828280                    | *        | SC32 |
| SC33 | 1578         | N08    | ChemBridge        | 5169046             | C <sub>11</sub> H <sub>12</sub> N <sub>2</sub> O <sub>2</sub>                  | 204         | 5569250; 6611042; 5718022                             |          | SC33 |
| SC34 | 1579         | C19    | ChemBridge        | 5264570             | C <sub>16</sub> H <sub>13</sub> NO                                             | 235         | 2177126; 2838279; 2177244                             |          | SC34 |
| SC35 | 1579         | E22    | ChemBridge        | 5176963             | C <sub>6</sub> H <sub>5</sub> NS <sub>3</sub>                                  | 187         | 2832072                                               |          | SC35 |
| SC36 | 1579         | F18    | ChemBridge        | 5240810             | C <sub>10</sub> H <sub>8</sub> N <sub>2</sub> O <sub>4</sub>                   | 220         | 747593; 1911041; 1911042                              |          | SC36 |
| SC37 | 1579         | N16    | ChemBridge        | 5240765             | C <sub>18</sub> H <sub>14</sub> N <sub>2</sub> O <sub>4</sub>                  | 322         | 6746064; 5417561; 5596031                             |          | SC37 |
| SC38 | 1580         | B08    | ChemBridge        | 5317697             | C <sub>9</sub> H <sub>11</sub> OS                                              | 185         | 794582                                                |          | SC38 |
| SC39 | 1581         | A12    | ChemBridge        | 5431041             | C <sub>17</sub> H <sub>18</sub> NOF <sub>3</sub>                               | 309         | 783606                                                |          | SC39 |
| SC40 | 1582         | E17    | ChemBridge        | 5710104             | C <sub>8</sub> H <sub>7</sub> NO <sub>3</sub>                                  | 165         | 869076; 96000; 11897671                               |          | SC40 |
| SC41 | 1582         | L14    | ChemBridge        | 5459675             | C <sub>17</sub> H <sub>21</sub> NO <sub>2</sub>                                | 271         | 11921442; 6456397; 11921441                           | *        | SC41 |
| SC42 | 1582         | M19    | ChemBridge        | 5718756             | C <sub>16</sub> H <sub>13</sub> N <sub>3</sub> O <sub>2</sub> S                | 339         | 6745067; 5336479                                      |          | SC42 |
| SC43 | 1583         | F15    | ChemBridge        | 5735144             | C <sub>16</sub> H <sub>12</sub> N <sub>2</sub> O <sub>2</sub>                  | 264         | 869358; 869359; 2865647                               |          | SC43 |



|      |      |     |            |                     |                           |     |                                                     |   |      |
|------|------|-----|------------|---------------------|---------------------------|-----|-----------------------------------------------------|---|------|
| SC44 | 1584 | A21 | ChemBridge | 5787636             | $C_{22}H_{27}NO_4$        | 369 | 5508822; 6758018; 5726290                           | * | SC44 |
| SC45 | 1585 | D07 | ChemBridge | 5809904             | $C_{17}H_{12}N_2O_4$      | 308 | 1916528; 873244                                     |   | SC45 |
| SC46 | 1585 | I05 | ChemBridge | 5943536             | $C_{18}H_{14}N_2O_3S_2$   | 368 | 9586234; 2235899                                    |   | SC46 |
| SC47 | 1586 | G16 | ChemBridge | 6274843             | $C_{19}H_{14}N_3O_4S_2Cl$ | 447 | 1348278; 1348277; 2274928                           | * | SC47 |
| SC48 | 1587 | F16 | ChemBridge | 6598710             | $C_{10}NOSCl_2$           | 252 | 759209                                              |   | SC48 |
| SC49 | 1588 | G16 | ChemBridge | 6888464             | $C_{18}H_{11}N_3O_6$      | 365 | 1323123                                             |   | SC49 |
| SC50 | 1590 | I16 | ChemBridge | 7564073             | $C_{14}H_{23}NO_3S$       | 285 | 623015                                              |   | SC50 |
| SC51 | 1593 | E15 | ChemBridge | 7693384             | $C_{15}H_{16}NOCl$        | 261 | 2948191; 828623; 828622                             |   | SC51 |
| SC52 | 1593 | O07 | ChemBridge | 7772407             | $C_{17}H_{20}N_2O_3S$     | 328 | 2953048                                             | * | SC52 |
| SC53 | 1600 | N13 | ChemBridge | 7992444             | $C_{12}H_{16}N_2O_2$      | 220 | 2985018                                             |   | SC53 |
| SC54 | 1607 | B19 | ChemDiv    | ChemDiv 0455-0021   | $C_{13}H_{21}N_2O_2^{1+}$ | 237 | 4597466; 6160337                                    | * | SC54 |
| SC55 | 1607 | K10 | ChemDiv    | ChemDiv 0149-0135   | $C_{21}H_{28}O_3$         | 328 | 5239155                                             |   | SC55 |
| SC56 | 1607 | M10 | ChemDiv    | ChemDiv 0157-0001   | $C_9O_2Cl$                | 175 | 87326                                               | * | SC56 |
| SC57 | 1607 | O08 | ChemDiv    | ChemDiv 0139-0206   | $C_7H_3NO_2Cl_4$          | 273 | 676444                                              |   | SC57 |
| SC58 | 1614 | A09 | ChemDiv    | ChemDiv 4767-1305   | $C_{24}H_{26}N_2O_6S$     | 470 | 1009503; 1809094                                    | * | SC58 |
| SC59 | 1614 | K07 | ChemDiv    | ChemDiv 4762-1092   | $C_{20}H_{20}N_3O_2SF$    | 385 | No ID                                               |   | SC59 |
| SC60 | 1617 | H15 | ChemDiv    | ChemDiv 6383-0891   | $C_{17}H_{18}N_3Cl$       | 299 | 975900                                              | * | SC60 |
| SC61 | 1617 | K01 | ChemDiv    | ChemDiv 6177-0034   | $C_{20}H_{20}N_2O_2$      | 320 | 7114457; 675011; 7114459; 5291898; 7114458; 2973216 |   | SC61 |
| SC62 | 1618 | N08 | ChemDiv    | ChemDiv 7202-2080   | $C_{20}H_{16}N_4O_4S_2$   | 436 | 22525620; 3318217; 5791770                          |   | SC62 |
| SC63 | 1618 | N18 | ChemDiv    | ChemDiv 7218-1489   | $C_{13}H_{12}N_2O_2S_2$   | 292 | 22332416                                            |   | SC63 |
| SC64 | 1618 | P08 | ChemDiv    | ChemDiv 7202-2246   | $C_{16}H_9N_4O_3S_3$      | 401 | 24283764; 7728365                                   |   | SC64 |
| SC66 | 1621 | D01 | ChemDiv    | ChemDiv C151-0032   | $C_{18}H_{16}N_2O$        | 276 | 4137609; 6018993                                    |   | SC66 |
| SC67 | 1621 | P05 | ChemDiv    | ChemDiv C151-0517   | $C_{18}H_{17}N_3O$        | 291 | 702066; 2265242; 2265240                            |   | SC67 |
| SC68 | 1621 | P07 | ChemDiv    | ChemDiv C151-0796   | $C_{15}H_{17}NO$          | 227 | 5050194                                             |   | SC68 |
| SC69 | 1622 | C10 | ChemDiv    | ChemDiv C201-0114   | $C_{11}N_2O_3$            | 208 | No ID                                               |   | SC69 |
| SC70 | 1628 | N07 | ChemDiv    | ChemDiv C700-1471   | $C_{20}N_3O_3S$           | 362 | 20876818                                            |   | SC70 |
| SC71 | 1648 | C05 | ChemDiv    | ChemDiv K906-4279   | $C_{10}H_{12}N_2O$        | 176 | 20969907                                            |   | SC71 |
| SC72 | 1648 | C13 | ChemDiv    | ChemDiv K939-0016   | $C_{14}H_{10}N_2O$        | 222 | 5398228; 260652; 16039283                           |   | SC72 |
| SC73 | 1648 | M09 | ChemDiv    | ChemDiv K915-1566   | $C_{24}H_{28}N_3O_3Cl$    | 441 | 3241960                                             |   | SC73 |
| SC74 | 1661 | C05 | Maybridge  | Maybridge AW 00693  | $C_{15}H_{14}N_4OCIF_3$   | 358 | 2795918                                             |   | SC74 |
| SC75 | 1661 | J01 | Maybridge  | Maybridge BTB 08680 | $C_{17}H_{12}N_2O_3F_2$   | 330 | 2801021                                             |   | SC75 |
| SC76 | 1662 | F06 | Maybridge  | Maybridge GK 03531  | $C_{14}H_{11}N_5OF_3$     | 336 | 2809005; 9583713; 5714465                           |   | SC76 |
| SC77 | 1662 | J21 | Maybridge  | Maybridge GK 02921  | $C_{14}H_{12}N_3O_2F_3$   | 311 | 2808617                                             |   | SC77 |
| SC78 | 1662 | P03 | Maybridge  | Maybridge FM 00024  | $C_{11}H_{15}NO_2$        | 193 | 11859264; 16100370; 2807445                         |   | SC78 |
| SC79 | 1663 | O19 | Maybridge  | Maybridge HTS 02701 | $C_{17}H_{17}N_2O_5Cl$    | 364 | 6975756; 6975759; 6975757; 2810830; 6975758         |   | SC79 |
| SC80 | 1664 | P13 | Maybridge  | Maybridge HTS 12963 | $C_8HN_2OS$               | 173 | 173760                                              |   | SC80 |
| SC81 | 1668 | B19 | Maybridge  | Maybridge SEW 03790 | $C_{12}H_{12}O_4S$        | 252 | 591564                                              |   | SC81 |
| SC82 | 1668 | D19 | Maybridge  | Maybridge SEW 03825 | $C_8H_3N_2Scl$            | 194 | 2740505                                             |   | SC82 |
| SC83 | 1668 | E07 | Maybridge  | Maybridge S 15443   | $C_{11}N_2O_2$            | 192 | 2738086                                             |   | SC83 |
| SC84 | 1668 | K16 | Maybridge  | Maybridge SEW 00543 | $C_{10}H_9OSCl$           | 212 | 6925757; 6925758; 2739084                           |   | SC84 |
| SC85 | 1669 | D06 | Maybridge  | Maybridge SPB 05266 | $C_{15}H_8N_4O_2Cl_2$     | 346 | 628891                                              |   | SC85 |
| SC86 | 1585 | E12 | ChemBridge | 6082181             | $C_{18}H_{16}N_4O_2S_2$   | 384 | No ID                                               |   | SC86 |
| E1   | 1481 | E10 | ChemDiv    | ChemDiv 4286-0237   | $C_{18}H_{16}N_2O_2$      | 292 | 6620710; 5334000                                    |   | E1   |
| E2   | 1484 | N01 | ChemDiv    | ChemDiv 4999-0666   | $C_{18}H_{16}N_2O_4S$     | 356 | 16193244; 6620788                                   | * | E2   |
| E3   | 1607 | N06 | ChemDiv    | ChemDiv 0645-0166   | $C_{18}N_2O_2$            | 276 | 202512                                              | * | E3   |
| E4   | 1473 | D13 | ChemDiv    | ChemDiv 0388-0143   | $C_{18}H_{15}NO_2$        | 277 | 67273                                               |   | E4   |

|     |      |     |            |                     |                         |     |                                                 |   |     |
|-----|------|-----|------------|---------------------|-------------------------|-----|-------------------------------------------------|---|-----|
| E5  | 1476 | C14 | ChemDiv    | ChemDiv 2374-0075   | $C_{21}H_{23}NO_2$      | 321 | 4533882; 11878901; 11878907; 11878905; 11878903 | * | E5  |
| E6  | 1487 | A14 | ChemDiv    | ChemDiv 5701-0577   | $C_{22}H_{25}NO_4$      | 367 | 4602281; 1854370                                | * | E6  |
| E7  | 1624 | O09 | ChemDiv    | ChemDiv C301-5476   | $C_9N_5O$               | 236 | 3163523                                         |   | E7  |
| E8  | 1669 | K04 | Maybridge  | Maybridge SPB 00784 | $C_{20}H_{23}N_3OS$     | 353 | 2743318                                         |   | E8  |
| E9  | 1476 | A20 | ChemDiv    | ChemDiv 2422-1298   | $C_{18}NOS$             | 278 | 1730434; 744351                                 | * | E9  |
| E10 | 1477 | M05 | ChemDiv    | ChemDiv 3062-0036   | $C_{18}H_{23}NO_2S_2$   | 349 | 1514885; 1514884; 3071511                       |   | E10 |
| E11 | 1481 | I10 | ChemDiv    | ChemDiv 4286-0239   | $C_{17}H_{14}N_2O_2$    | 278 | 14741964; 6620717                               | * | E11 |
| E12 | 1580 | H11 | ChemBridge | 5279826             | $C_{11}O_2$             | 164 | 765984                                          |   | E12 |
| E13 | 1608 | P13 | ChemDiv    | ChemDiv 1683-1038   | $C_{17}N_2O_3S$         | 312 | 668008; 668009                                  | * | E13 |
| E14 | 1612 | P06 | ChemDiv    | ChemDiv 4286-0232   | $C_{16}H_{14}N_2O$      | 250 | 5339421; 5416091; 6801758                       | * | E14 |
| E15 | 1639 | B02 | ChemDiv    | ChemDiv E781-0267   | $C_{17}H_{21}N_6OCl$    | 360 | 16456505                                        |   | E15 |
| E16 | 1669 | O21 | Maybridge  | Maybridge SPB 00465 | $C_{12}H_9N_2O_2SClF_2$ | 318 | 2743188                                         |   | E16 |
| E17 | 544  | K16 | Maybridge  | Maybridge BTB 04176 | $C_{15}H_{11}NOSCl_3F$  | 377 | 2798260                                         |   | E17 |
| E18 | 545  | J10 | Maybridge  | Maybridge BTB 06548 | $C_{17}H_{13}N_5O$      | 303 | 2799743                                         |   | E18 |
| E19 | 545  | L09 | Maybridge  | Maybridge BTB 06196 | $C_{13}H_9NOClF$        | 249 | 705916                                          | * | E19 |
| E20 | 550  | M11 | Maybridge  | Maybridge CD 09133  | $C_{10}H_{11}O_6S_3F_3$ | 380 | 2805283                                         |   | E20 |
| E21 | 554  | A04 | Maybridge  | Maybridge KM 01302  | $C_9N_4O$               | 180 | 2735244                                         |   | E21 |
| E22 | 1474 | D07 | ChemDiv    | ChemDiv 1326-0389   | $C_{17}H_{12}NO_2Cl$    | 297 | 598489                                          |   | E22 |
| E23 | 1502 | O11 | ChemDiv    | ChemDiv C620-0170   | $C_{19}H_{15}N_2O_2Br$  | 382 | 6622833                                         |   | E23 |
| E24 | 1517 | D20 | ChemDiv    | ChemDiv D090-0079   | $C_{14}H_{17}N_2Cl$     | 248 | 846381; 3138840; 846380                         |   | E24 |
| E25 | 1577 | A04 | ChemBridge | 5108485             | $C_{17}H_{17}NO_2$      | 267 | 744328; 744324                                  | * | E25 |
| E26 | 1581 | M02 | ChemBridge | 5406375             | $C_{11}H_9NO_3$         | 203 | 5397103                                         |   | E26 |
| E27 | 1582 | L05 | ChemBridge | 5402066             | $C_{16}H_{11}NO_3$      | 265 | 5403890; 768328                                 |   | E27 |
| E28 | 1586 | L12 | ChemBridge | 6717002             | $C_{14}H_{14}NO_3S_2Br$ | 403 | 5733354; 2911684                                | * | E28 |
| E29 | 1610 | A10 | ChemDiv    | ChemDiv 3178-0151   | $C_{17}H_{14}O_5$       | 298 | 743982                                          |   | E29 |
| E30 | 1624 | B02 | ChemDiv    | ChemDiv C355-1313   | $C_{21}N_4O_7S_2Cl$     | 519 | No ID                                           | * | E30 |
| E31 | 1639 | J17 | ChemDiv    | ChemDiv E771-0423   | $C_{19}H_{23}N_3O$      | 309 | 20916544                                        | * | E31 |
| E32 | 1641 | F12 | ChemDiv    | ChemDiv G017-4142   | $C_{16}H_{22}N_2O_3S_3$ | 382 | 20937318                                        |   | E32 |
| E33 | 1642 | I06 | ChemDiv    | ChemDiv G125-0751   | $C_{25}H_{30}N_4O_2S$   | 450 | 20940800                                        |   | E33 |
| E34 | 1643 | O03 | ChemDiv    | ChemDiv G278-0048   | $C_{17}H_{21}N_3O_2S$   | 331 | 20947619                                        |   | E34 |
| E35 | 1645 | D06 | ChemDiv    | ChemDiv K405-2825   | $C_{16}H_{16}N_5Cl$     | 313 | 17017244                                        |   | E35 |
| E36 | 1647 | M07 | ChemDiv    | ChemDiv K786-8481   | $C_{25}N_5O_2Cl_2$      | 472 | 15994483                                        |   | E36 |
| E37 | 1663 | E03 | Maybridge  | Maybridge HTS 01393 | $C_{18}H_{19}N_3OF_4$   | 369 | 2810103; 7189247; 7189249                       |   | E37 |
| E38 | 1669 | A20 | Maybridge  | Maybridge SPB 02768 | $C_{14}H_{15}N_2O_2SBr$ | 354 | 2744343                                         |   | E38 |
| E39 | 1669 | K02 | Maybridge  | Maybridge SPB 00548 | $C_{16}H_{14}N_3OSCl$   | 331 | 2743236                                         |   | E39 |
| E40 | 1669 | P15 | Maybridge  | Maybridge SPB 04530 | $C_{16}H_{15}N_3O_3S$   | 329 | 2745327                                         |   | E40 |
| E41 | 1670 | C01 | Maybridge  | Maybridge SPB 07631 | $C_{18}H_{19}NO$        | 265 | 2746994                                         |   | E41 |

**Table S4. Characterization of the confirmed positive hit compounds.** <sup>a</sup> '+' indicates inhibition of membrane translocation greater than 75% of control.

<sup>b</sup> For morphological observation of adherent cells, HeLa cells were plated in 24-well culture dish and grown overnight in serum rich condition. Following chemical addition (8 µg/ml), the bright field images of live cells were taken at 30 min and 6 hr. '+' indicates chemicals that lead to morphological changes and/or detachment. For MTT-based cell viability assay for suspension cells, the readings (absorbance 570 nm) from triplicates were averaged and normalized against DMSO-treated group. The relative inhibitory activity was presented as following: +/- (0.9-1.16); + (0.75-0.90); ++ (0.60-0.75); +++ (0.45-0.60); ++++ (0.30-0.45); +++++ (0.15-0.30); ++++++ (<0.15).

| ID           | Membrane translocation assay <sup>a</sup> |                   |                         | Drug toxicity <sup>b</sup> |      |                   |           | Effect on Akt phosphorylation (-, no effect; +, inhibited) |       |          |               |          |          |          |
|--------------|-------------------------------------------|-------------------|-------------------------|----------------------------|------|-------------------|-----------|------------------------------------------------------------|-------|----------|---------------|----------|----------|----------|
|              | PH <sub>AMC</sub> -GFP                    |                   | PH <sub>PLCδ</sub> -GFP | Cell morphology            |      | MTT assay         |           | IGF-induced                                                |       |          | GPCR-mediated |          |          |          |
|              | High throughput screening                 | Live cell imaging | Live cell imaging       | 0.5 hr                     | 6 hr | (16 hr treatment) |           | (4 µg/ml)                                                  |       |          | (HL60 cells)  |          |          |          |
|              | First                                     | Second            |                         |                            |      | HsSultan cells    | NB4 cells | HeLa                                                       | NB4   | HsSultan | 8 mg/ml       | 4 mg/ml  |          |          |
| SC2          | +                                         | +                 | +                       | -                          | -    | 0.13              | +++++     | 0.19                                                       | ++++  | +        | +             | +        | +        | -        |
| SC3          | +                                         | +                 | +                       | -                          | -    | 0.76              | +         | 0.79                                                       | +     | -        | +             | +        | -        | +        |
| SC4          | +                                         | +                 | +                       | -                          | -    | 0.25              | +++++     | 0.28                                                       | +++++ | +        | +             | +        | +        | +        |
| SC5          | +                                         | +                 | +                       | -                          | -    | 0.12              | +++++     | 0.20                                                       | +++++ | +        | +             | +        | +        | +        |
| SC7          | +                                         | +                 | +                       | -                          | -    | 0.13              | +++++     | 0.32                                                       | ++++  | +        | +             | +        | +        | +        |
| SC16         | +                                         | +                 | +                       | -                          | -    | 0.20              | +++++     | 0.45                                                       | ++++  | +        | +             | +        | +        | +        |
| SC17         | +                                         | +                 | +                       | -                          | -    | 0.12              | +++++     | 0.19                                                       | +++++ | +        | +             | +        | -        | -        |
| SC25         | +                                         | +                 | +                       | -                          | -    | 0.13              | +++++     | 0.20                                                       | +++++ | +        | +             | +        | +        | -        |
| SC26         | +                                         | +                 | +                       | -                          | -    | 0.13              | +++++     | 0.84                                                       | +     | +        | +             | -        | +        | -        |
| SC30         | +                                         | +                 | +                       | -                          | -    | 0.73              | ++        | 0.69                                                       | ++    | -        | +             | -        | +        | -        |
| SC31         | +                                         | +                 | +                       | -                          | -    | 1.05              | +/-       | 1.02                                                       | +/-   | +        | -             | -        | +        | +        |
| SC33         | +                                         | +                 | +                       | -                          | -    | 0.89              | +         | 1.16                                                       | +/-   | -        | -             | -        | -        | -        |
| SC35         | +                                         | +                 | +                       | -                          | -    | 0.14              | +++++     | 0.33                                                       | ++++  | +        | +             | -        | -        | -        |
| SC36         | +                                         | +                 | +                       | -                          | -    | 0.82              | +         | 0.83                                                       | +     | +        | +             | +        | +        | +        |
| SC38         | +                                         | +                 | +                       | -                          | -    | 0.71              | ++        | 0.90                                                       | +/-   | +        | +             | +        | +        | +        |
| SC39         | +                                         | +                 | +                       | -                          | -    | 0.69              | ++        | 0.84                                                       | +     | +        | -             | -        | +        | +        |
| SC43         | +                                         | +                 | +                       | -                          | -    | 0.89              | +         | 0.75                                                       | +     | +        | +             | +        | +        | +        |
| SC44         | +                                         | +                 | +                       | -                          | -    | 0.83              | +         | 1.02                                                       | +/-   | +        | +             | +        | -        | -        |
| SC45         | +                                         | +                 | +                       | -                          | -    | 0.85              | +         | 1.00                                                       | +/-   | +        | +             | +        | +        | +        |
| SC46         | +                                         | +                 | +                       | -                          | -    | 0.51              | +++       | 0.37                                                       | ++++  | -        | +             | -        | -        | -        |
| SC51         | +                                         | +                 | +                       | -                          | -    | 1.02              | +/-       | 0.68                                                       | ++    | +        | +             | +        | -        | -        |
| SC55         | +                                         | +                 | +                       | -                          | -    | 0.80              | +         | 0.62                                                       | ++    | +        | +             | +        | +        | +        |
| SC57         | +                                         | +                 | +                       | -                          | -    | 0.20              | +++++     | 0.70                                                       | ++    | +        | +             | -        | +        | +        |
| SC59         | +                                         | +                 | +                       | -                          | -    | 0.27              | +++++     | 0.38                                                       | ++++  | -        | -             | -        | +        | +        |
| SC62         | +                                         | +                 | +                       | -                          | -    | 0.32              | +++++     | 0.27                                                       | +++++ | +        | -             | -        | +        | +        |
| SC64         | +                                         | +                 | +                       | -                          | -    | 0.27              | +++++     | 0.25                                                       | +++++ | +        | -             | -        | -        | -        |
| SC69         | +                                         | +                 | +                       | -                          | -    | 0.90              | +/-       | 0.96                                                       | +/-   | +        | +             | +        | -        | -        |
| SC74         | +                                         | +                 | +                       | -                          | -    | 0.74              | ++        | 0.26                                                       | +++++ | +        | +             | +        | -        | -        |
| SC75         | +                                         | +                 | +                       | -                          | -    | 0.97              | +/-       | 0.99                                                       | +/-   | +        | +             | +        | -        | -        |
| SC79         | +                                         | +                 | +                       | -                          | -    | 0.90              | +/-       | 0.83                                                       | +     | increase | increase      | increase | increase | increase |
| SC80         | +                                         | +                 | +                       | -                          | -    | 0.91              | +/-       | 0.98                                                       | +/-   | -        | +             | +        | -        | -        |
| SC83         | +                                         | +                 | +                       | -                          | -    | 0.76              | +         | 0.82                                                       | +     | +        | +             | +        | +        | +        |
| SC84         | +                                         | +                 | +                       | -                          | -    | 0.89              | +         | 0.88                                                       | +     | +        | +             | +        | +        | +        |
| E7           | +                                         | +                 | +                       | -                          | -    | 1.02              | +/-       | 0.96                                                       | +/-   | +        | +             | -        | +        | +        |
| E8           | +                                         | +                 | +                       | -                          | -    | 0.84              | +         | 0.69                                                       | ++    | +        | +             | +        | +        | +        |
| E10          | +                                         | +                 | +                       | -                          | -    | 0.61              | ++        | 0.44                                                       | ++++  | +        | +             | +        | +        | +        |
| E12          | +                                         | +                 | +                       | -                          | -    | 0.36              | ++++      | 0.18                                                       | +++++ | +        | +             | +        | +        | +        |
| E17          | +                                         | +                 | +                       | -                          | -    | 0.80              | +         | 0.74                                                       | ++    | +        | +             | +        | +        | +        |
| E19          | +                                         | +                 | +                       | -                          | -    | 0.83              | +         | 0.66                                                       | ++    | +        | -             | +        | +        | +        |
| E20          | +                                         | +                 | +                       | -                          | -    | 0.57              | +++       | 0.51                                                       | +++   | -        | -             | -        | +        | +        |
| E29          | +                                         | +                 | +                       | -                          | -    | 0.44              | ++++      | 0.35                                                       | ++++  | +        | -             | -        | +        | +        |
| E40          | +                                         | +                 | +                       | -                          | -    | 1.05              | +/-       | 0.94                                                       | +/-   | +        | +             | +        | +        | +        |
| SC1          | +                                         | +                 | +                       | -                          | -    | 0.13              | +++++     | 0.27                                                       | +++++ | -        | +             | +        | +        | +        |
| SC11         | +                                         | +                 | +                       | -                          | -    | 0.27              | +++++     | 0.41                                                       | +++   | +        | +             | -        | +        | +        |
| SC13         | +                                         | +                 | +                       | -                          | -    | 0.19              | +++++     | 0.21                                                       | +++++ | +        | +             | +        | +        | +        |
| SC19         | +                                         | +                 | +                       | -                          | -    | 0.12              | +++++     | 0.19                                                       | +++++ | +/-      | +             | -        | +        | -        |
| SC23         | +                                         | +                 | +                       | -                          | -    | 0.21              | +++++     | 0.38                                                       | ++++  | +        | -             | -        | +        | -        |
| SC27         | +                                         | +                 | +                       | -                          | -    | 0.14              | +++++     | 0.35                                                       | ++++  | +        | +             | +        | +        | -        |
| SC49         | +                                         | +                 | +                       | -                          | -    | 0.58              | +++       | 1.08                                                       | +/-   | +        | +             | +        | +        | +        |
| SC63         | +                                         | +                 | +                       | -                          | -    | 0.69              | ++        | 0.83                                                       | +     | +        | +             | +        | +        | +        |
| SC66         | +                                         | +                 | +                       | -                          | -    | 0.15              | +++++     | 0.40                                                       | ++++  | +/-      | +             | -        | +        | +        |
| SC67         | +                                         | +                 | +                       | -                          | -    | 0.21              | +++++     | 0.57                                                       | +++   | -        | -             | -        | +        | +        |
| SC86         | +                                         | +                 | +                       | -                          | -    | 0.55              | +++       | 1.05                                                       | +/-   | +/-      | -             | -        | +        | +        |
| E26          | +                                         | +                 | +                       | -                          | -    | 0.88              | +         | 0.92                                                       | +/-   | +/-      | -             | +        | +        | +        |
| WTM (100 nM) | +                                         | +                 | +                       | -                          | -    | 0.94              | +/-       | 0.84                                                       | +     | +        | +             | +        | +        | +        |
| DMSO         | -                                         | -                 | -                       | -                          | -    | 1                 | +/-       | 1                                                          | +/-   | -        | -             | -        | -        | +        |

**Table S5.** The secondary structures of human Akt1 and its complex with SC79 were analyzed using circular dichroism (CD) spectroscopy.

|                                            | Akt1 (5mM) | Akt1+ SC79 (25 mM) | Akt1+ SC79 (50 mM) |
|--------------------------------------------|------------|--------------------|--------------------|
| % alpha-helix                              | 30         | 25                 | 26                 |
| % beta-sheets                              | 16         | 19                 | 18                 |
| % random coil                              | 54         | 56                 | 56                 |
| Sum (sec. structural content)              | 46         | 44                 | 44                 |
| Random coil                                | 54         | 56                 | 56                 |
| % Loss in sec. structure upon SC79 binding |            | 4.3                | 4.3                |

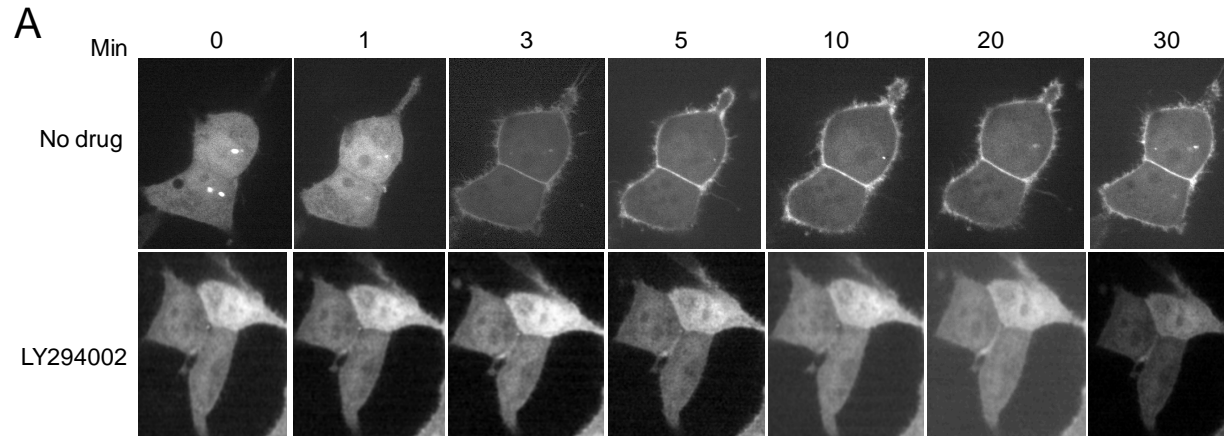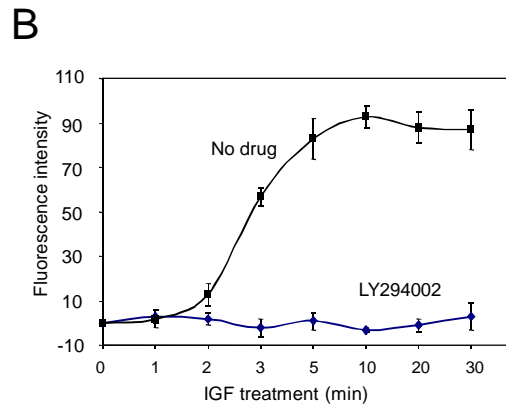

**Figure S1. Insulin-like growth factor 1 -induced Akt plasma membrane translocation.** HeLa cells were transfected with a construct expressing the PH-domain of Akt fused with enhance green fluorescent protein (PH-EGFP). Using Lipofectamine 2000 reagent (Invitrogen), transfection efficiencies of >80% were routinely obtained. Cells were starved in serum free medium overnight and the Akt membrane translocation was triggered by IGF1 (final concentration 100 ng/ml). For LY294002 treatment, the drug (20  $\mu$ M) was added to the culture medium 60 min before the IGF1 stimulation. **(A)** Confocal fluorescent images of PH-EGFP were captured at each of the indicated time points. Each experiment was repeated at least three times and virtually the same results were obtained each time. The figure shows the results of a representative experiment. **(B)** Quantitative analysis of the IGF1-elicited translocation of PH-EGFP. The average membrane fluorescence intensities in (A) were measured with IPLab software as previously described. The arbitrary number of the membrane fluorescence intensity in each individual cell was normalized to the total fluorescence intensity of the cell. Intensities from “0 min” frame was subtracted from each of the other frames and plotted as a function of time after IGF1 stimulation. The results are the means ( $\pm$  SD) of 20 transfected cells in three independent experiments.

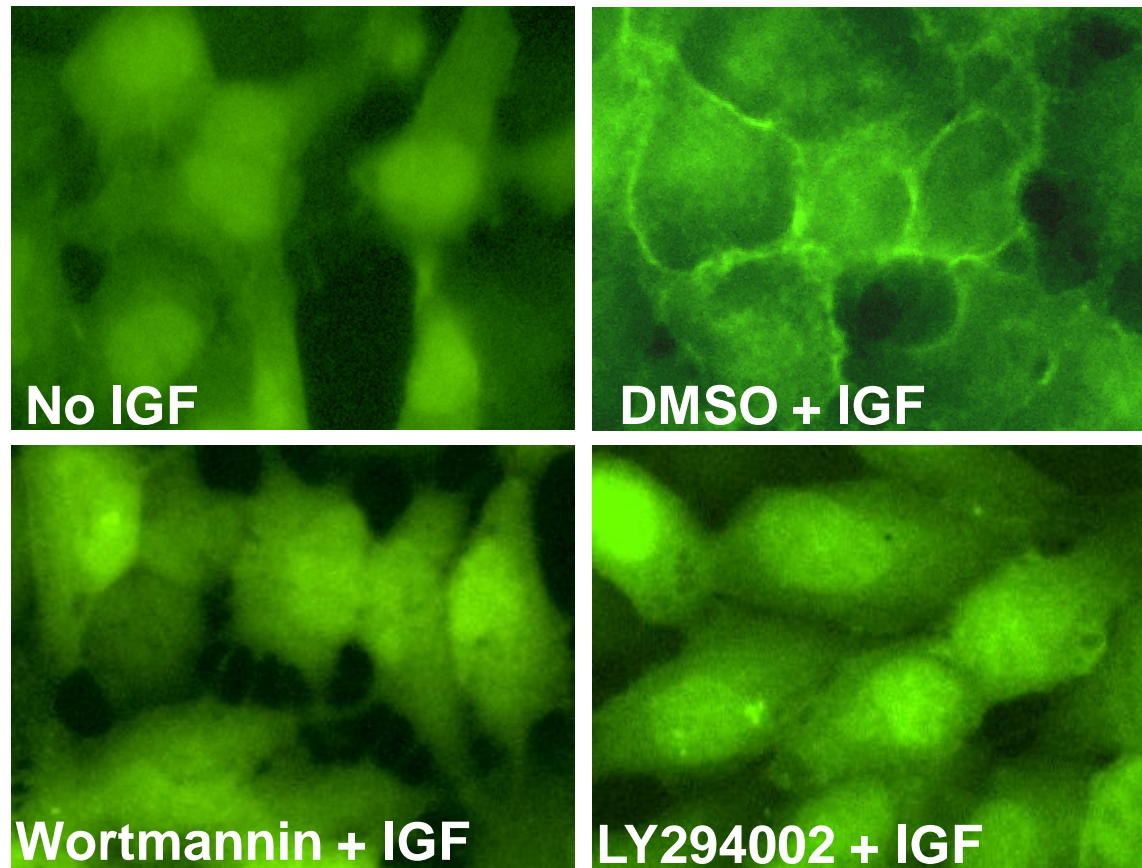

**Figure S2. Generation of a stable HeLa cell line expressing Akt-PH-EGFP fusion protein.** To generate a stable HeLa cell line, the plasmid containing PH-EGFP driven by chicken beta-globin promoter was co-transfected with pcDNA3.1. The transfected cells were selected in the presence of G418 (2 mg/ml) for two weeks, and the stable PH-EGFP expressing clones were isolated and maintained in the medium containing G418 (200 mg/ml). The membrane translocation of PH-EFP, as described in Figure S1, was conducted in 384-well plate. Serum-starved cells were fixed in 3 % PFA (no IGF) or pre-treated with DMSO or PI3K inhibitors; wortmannin (200 nM) and LY294002 (20 mM) for 30 min and stimulated with IGF1 (100 ng/ml) for additional 15-30 min before fixation. Images were taken using a fully automated fluorescent microscope, Image Xpress Micro (Molecular Dynamics).

## Experimental steps

## Notes

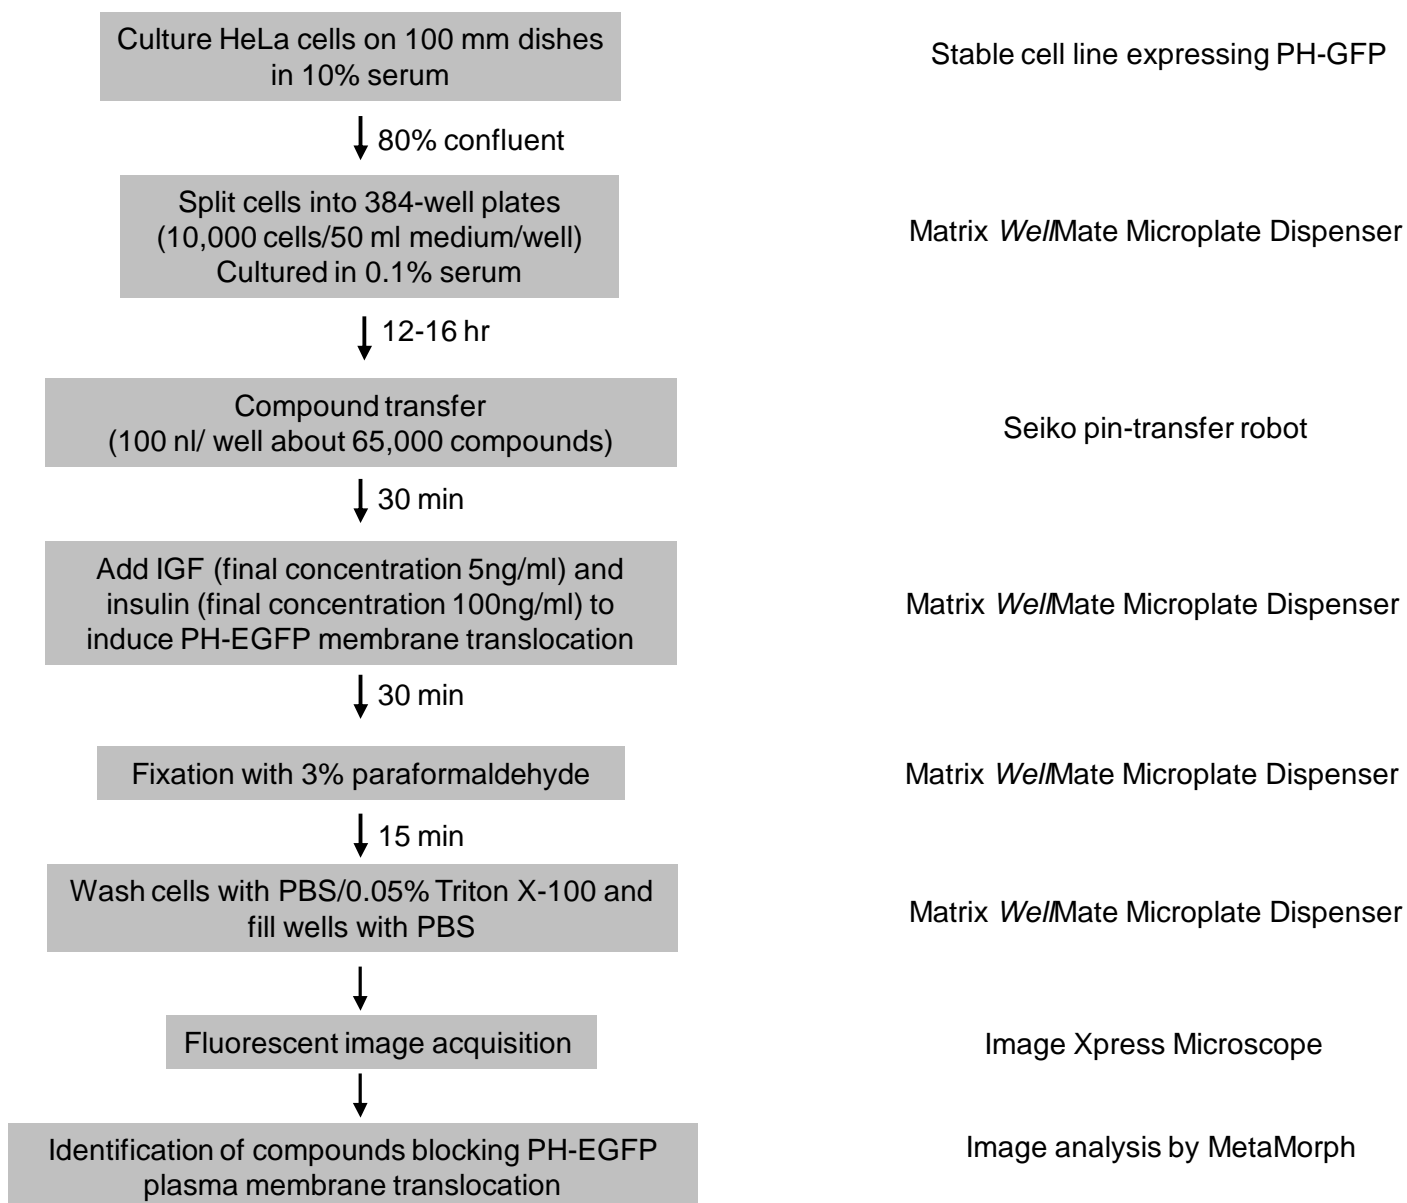

**Figure S3.** The flowchart of the cell-based high throughput screening for inhibitors of Akt plasma membrane translocation.



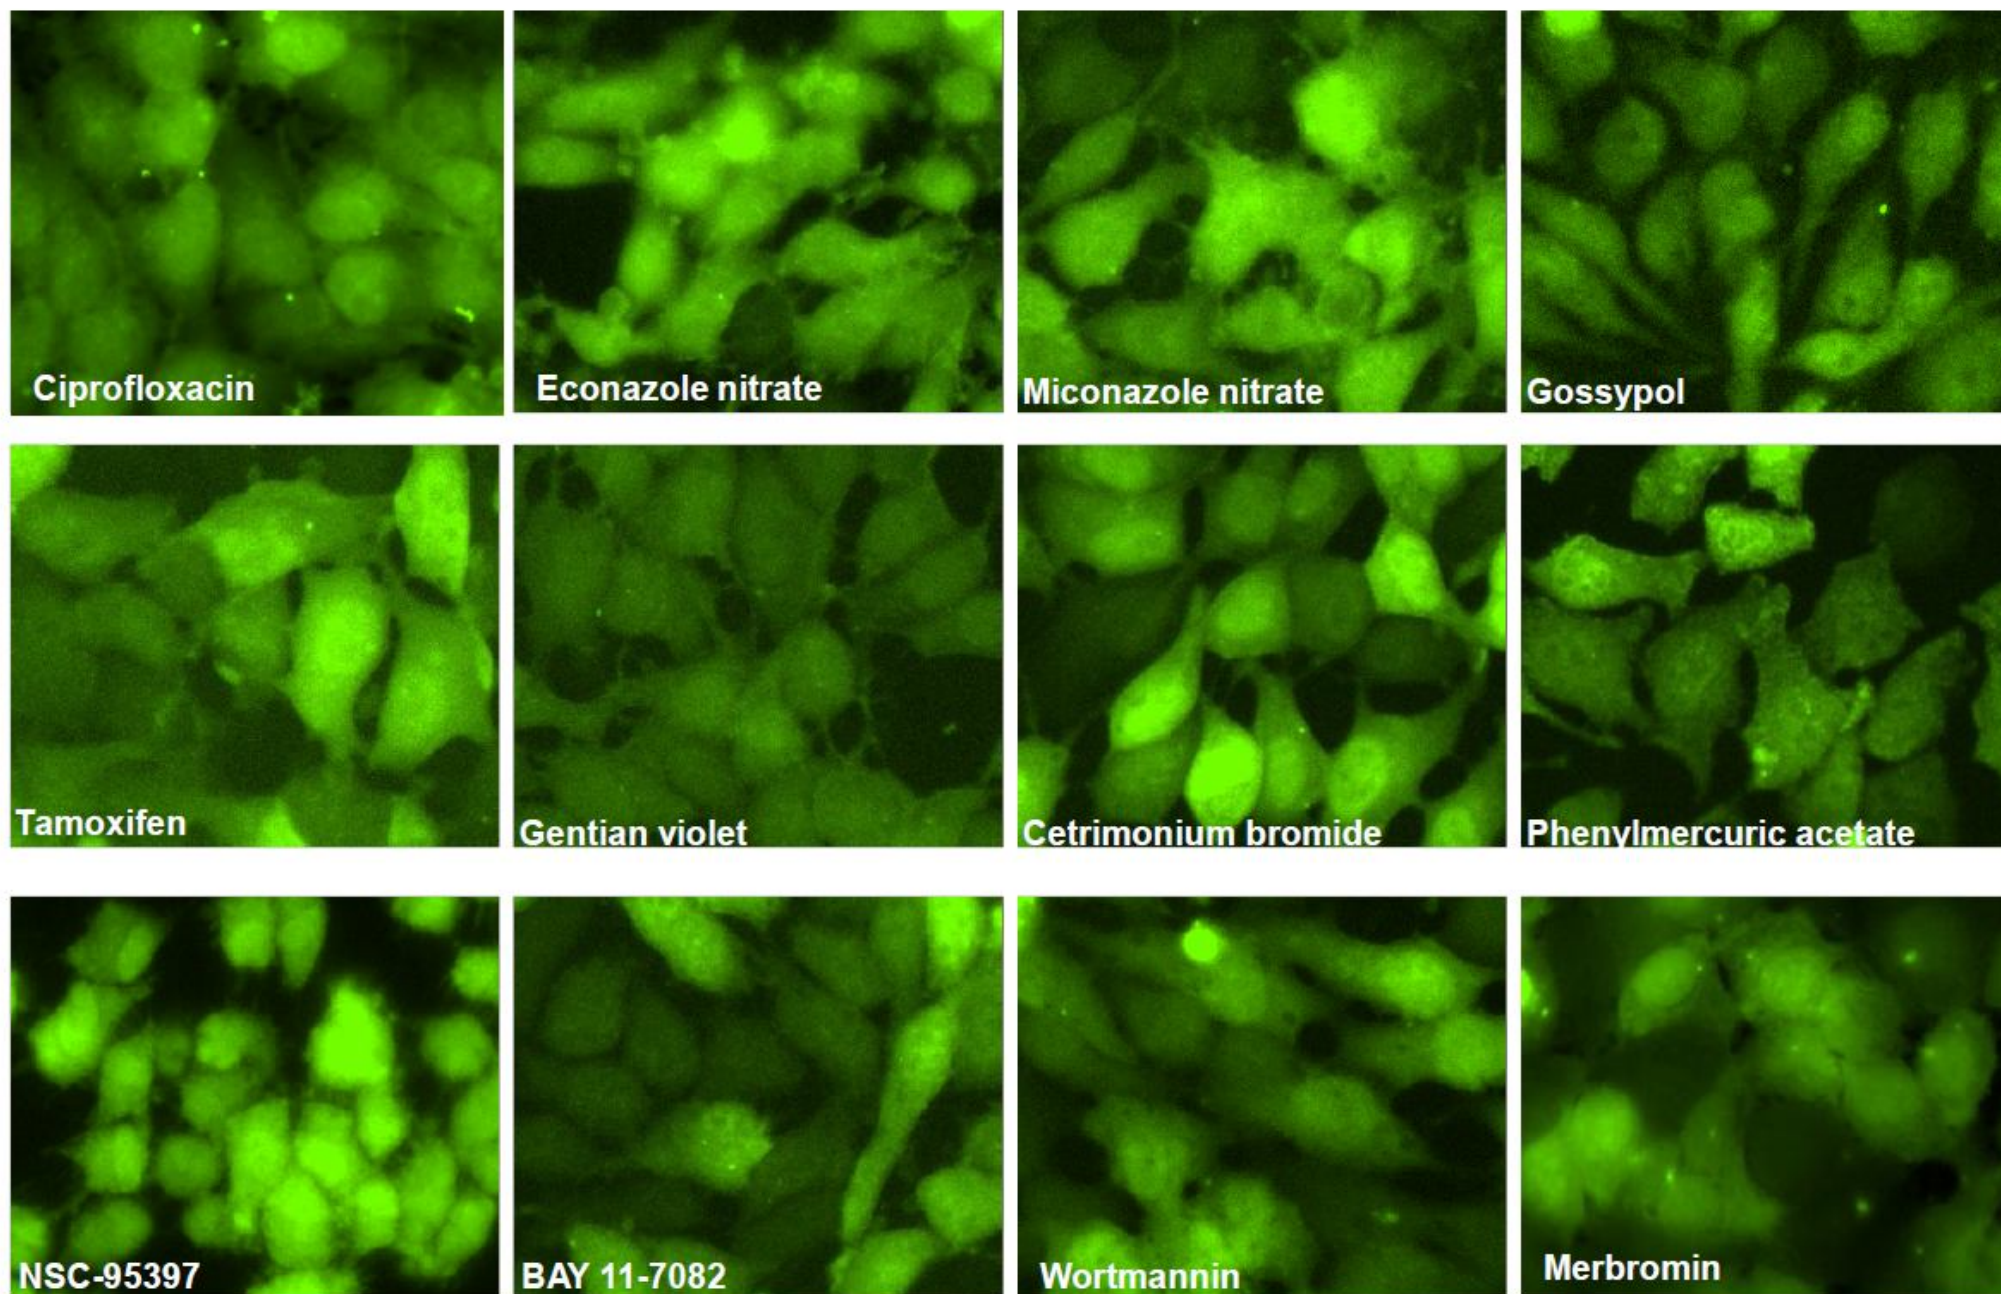



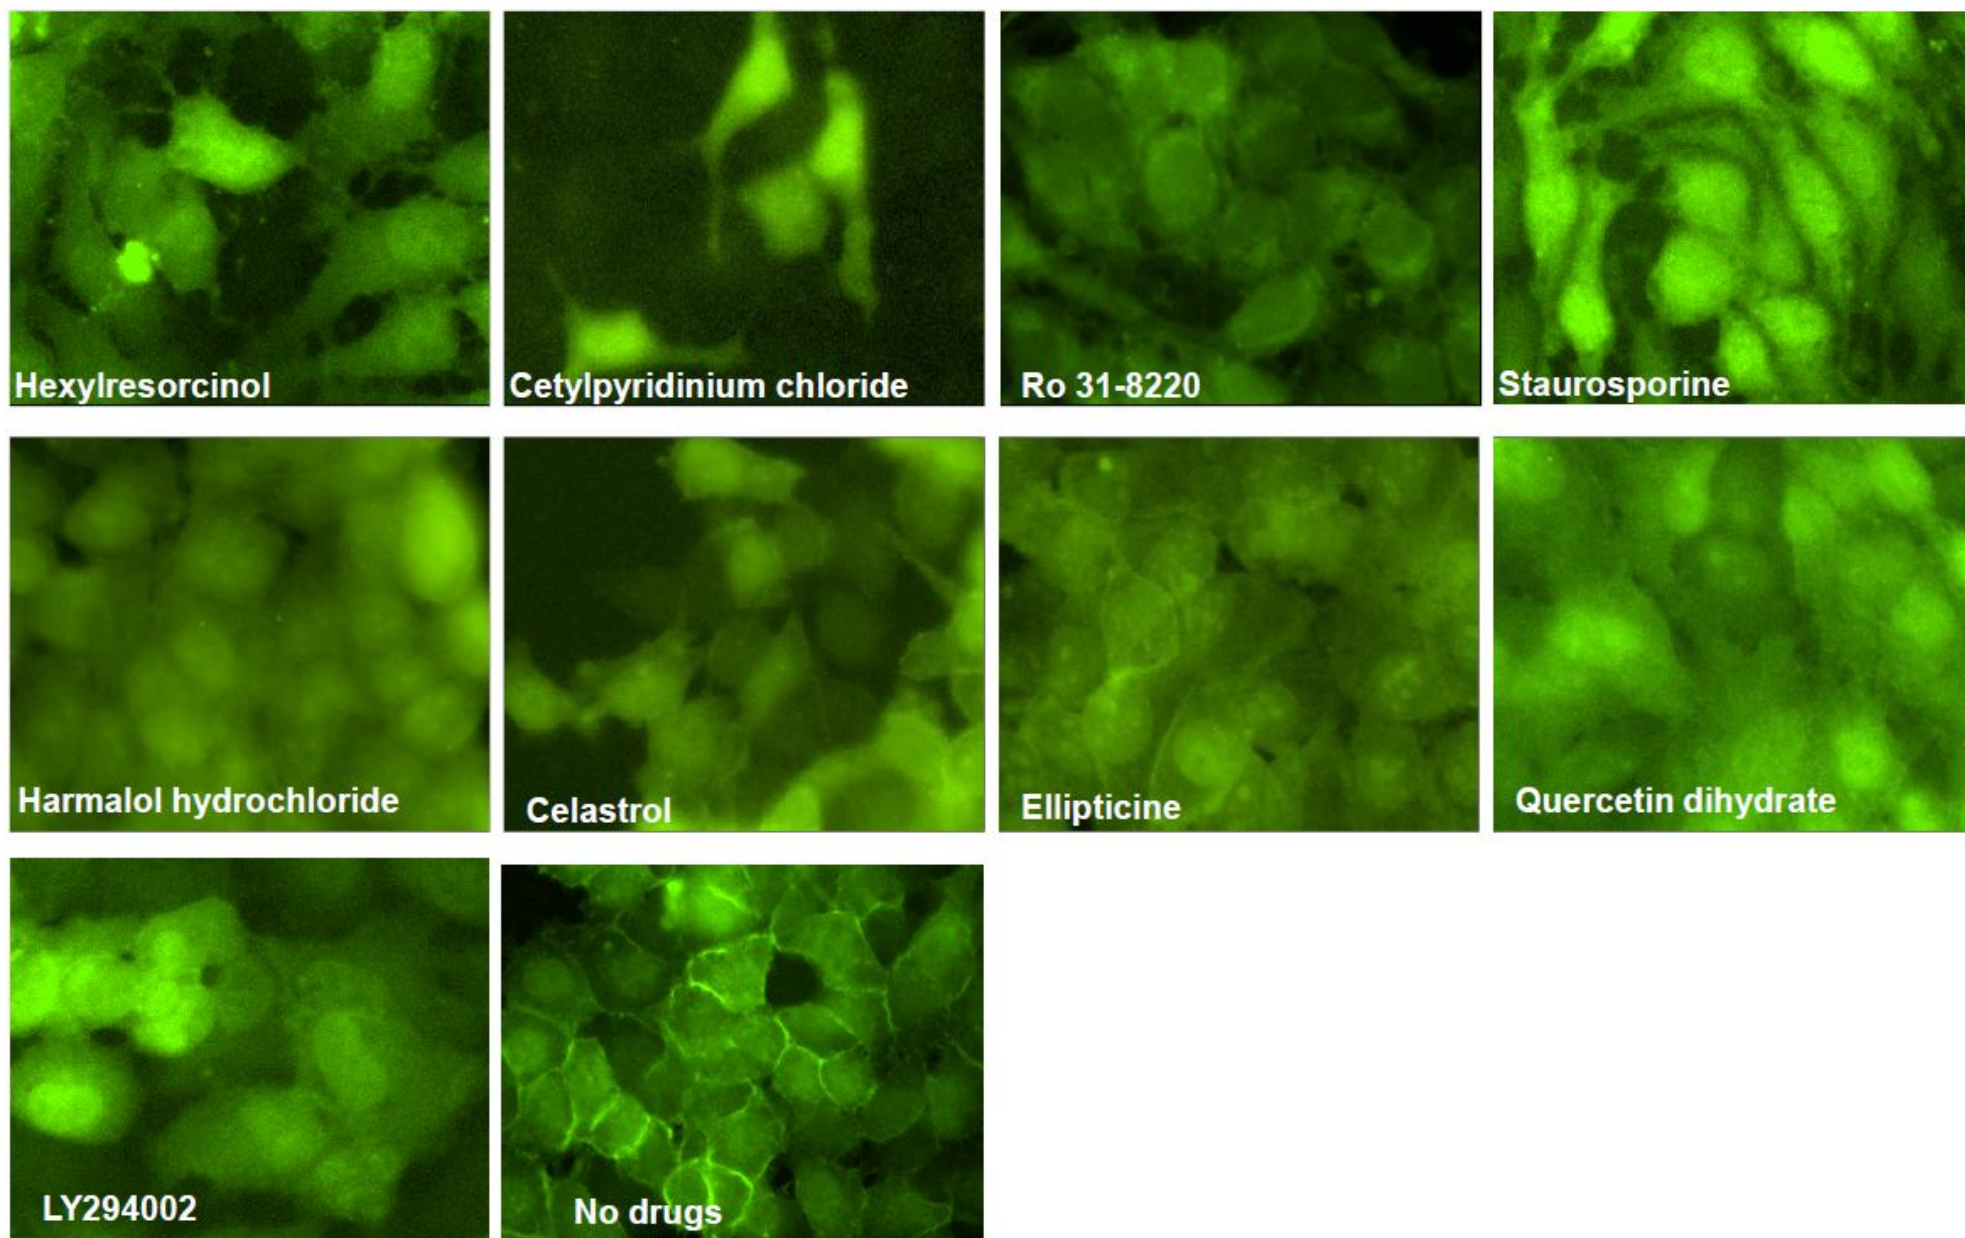

**Figure S4.** Pilot screening identified 21 bioactive compounds that inhibit IGF1-induced Akt-PH-EGFP membrane translocation.

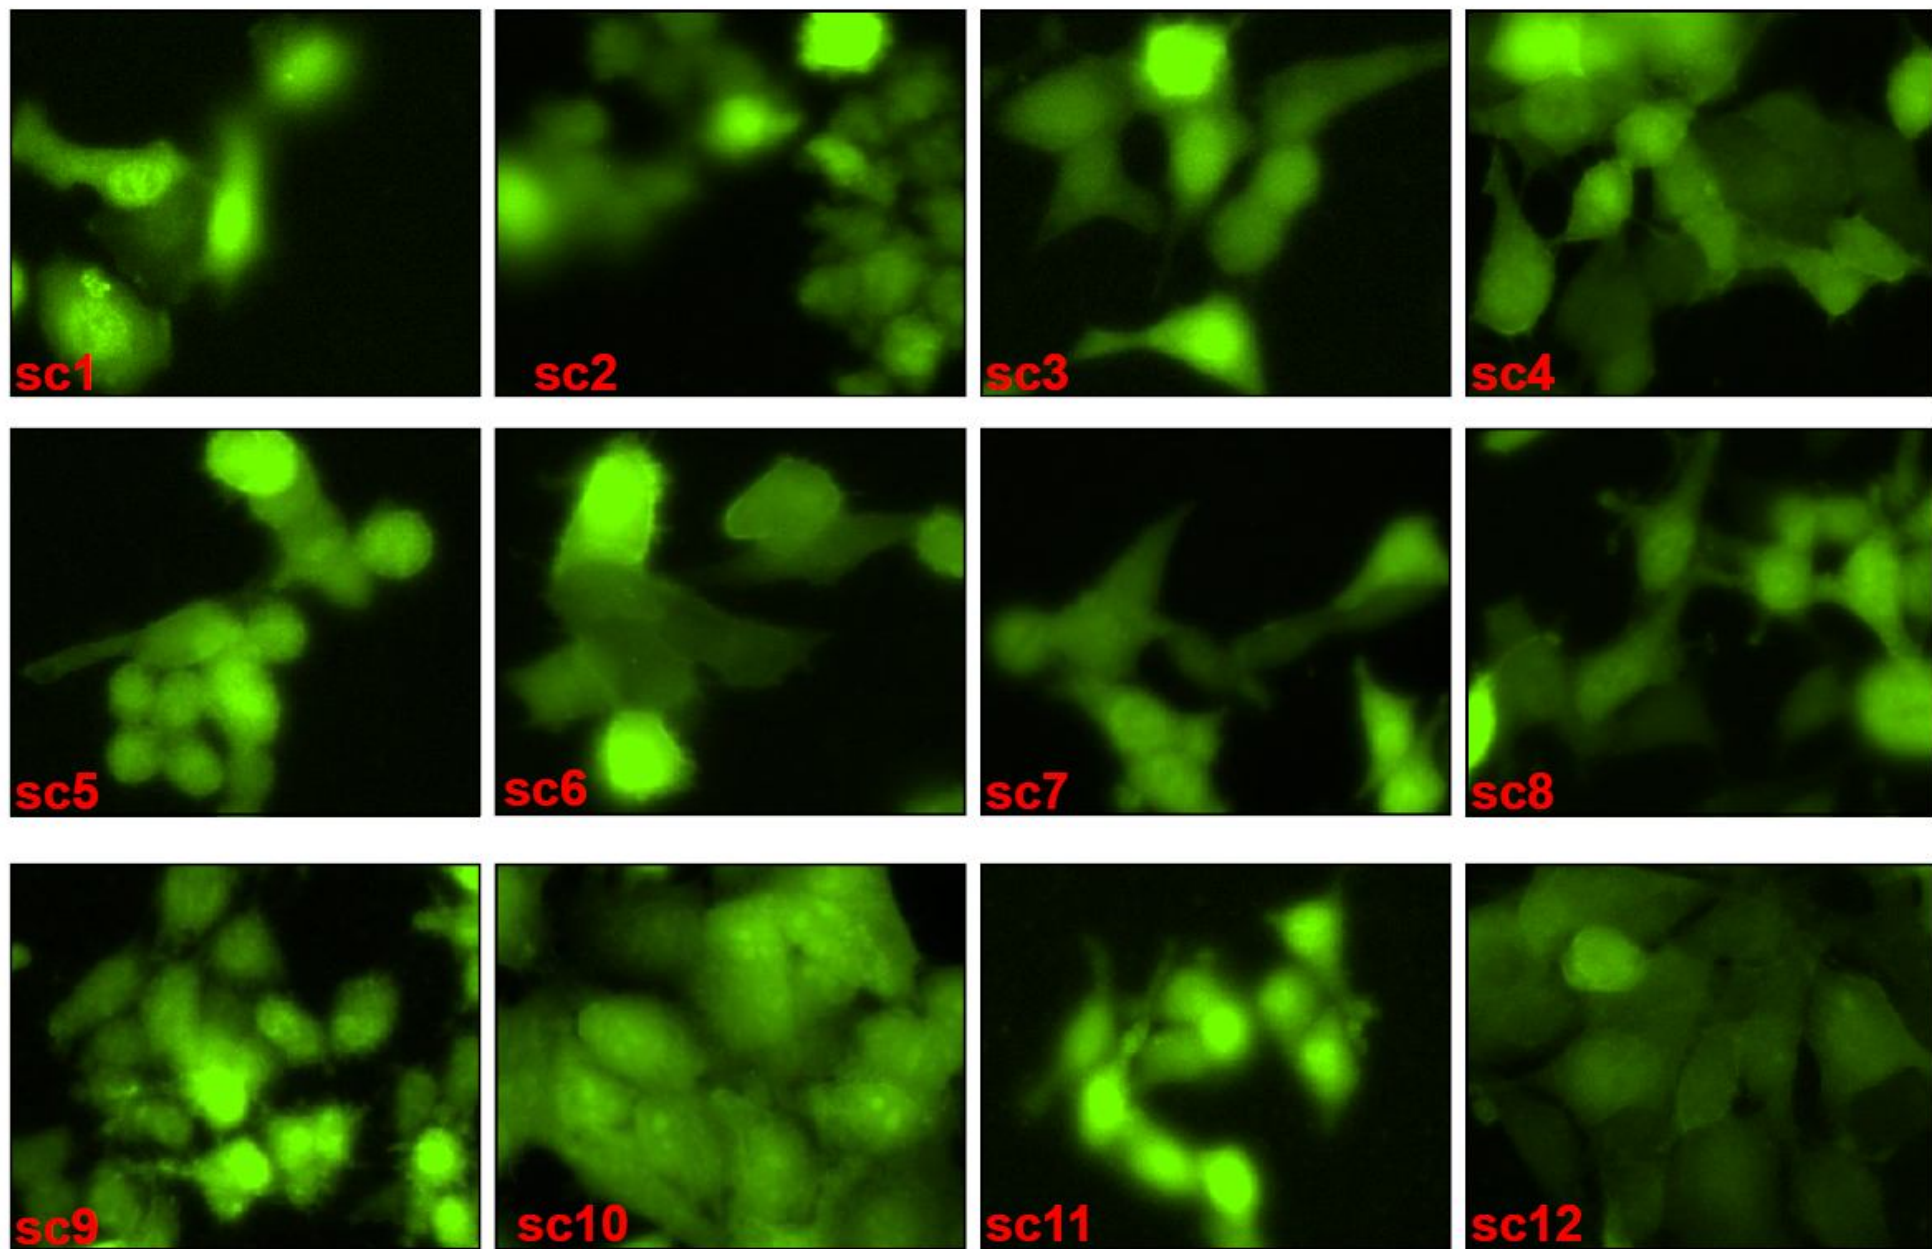



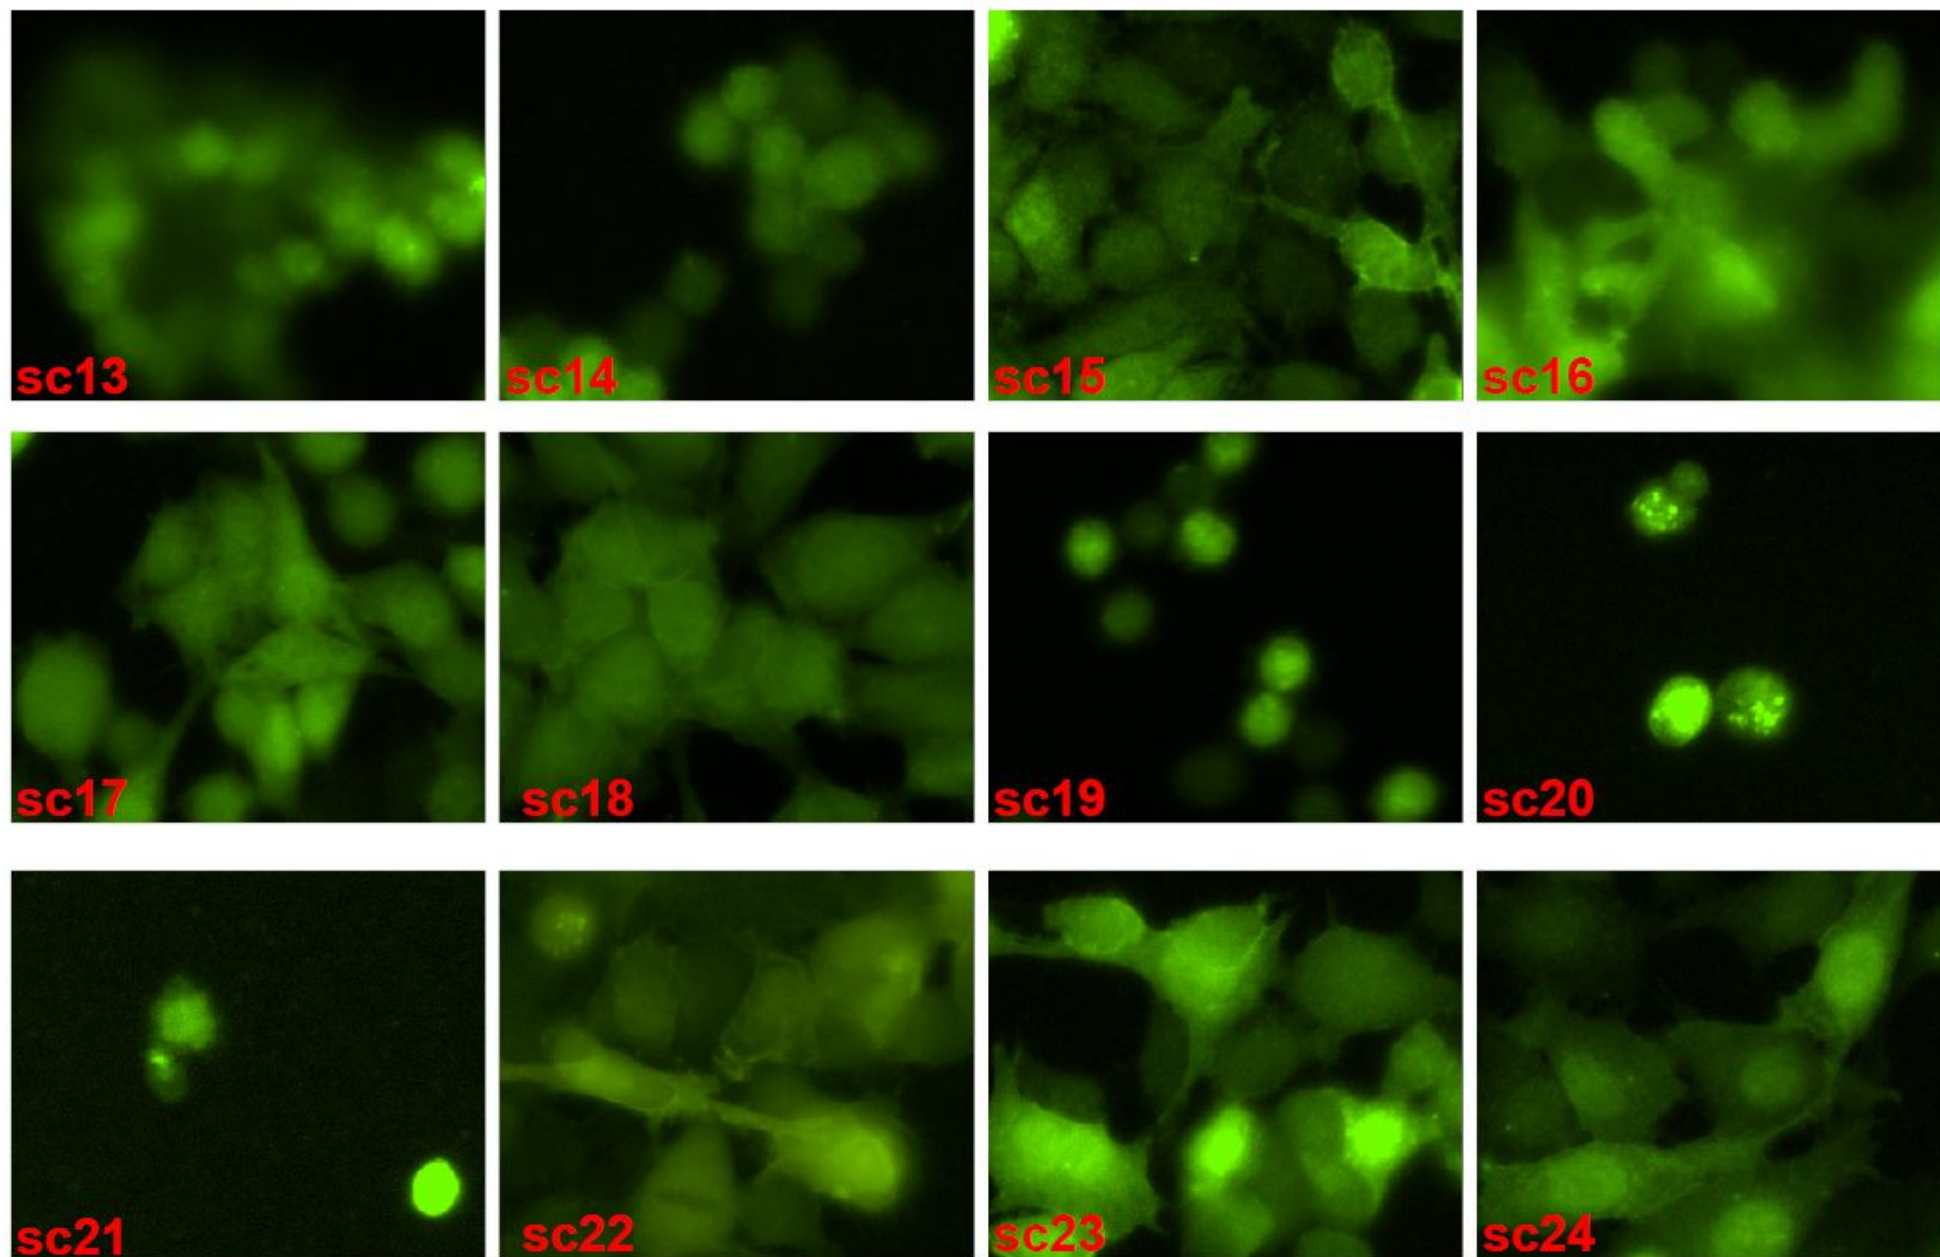

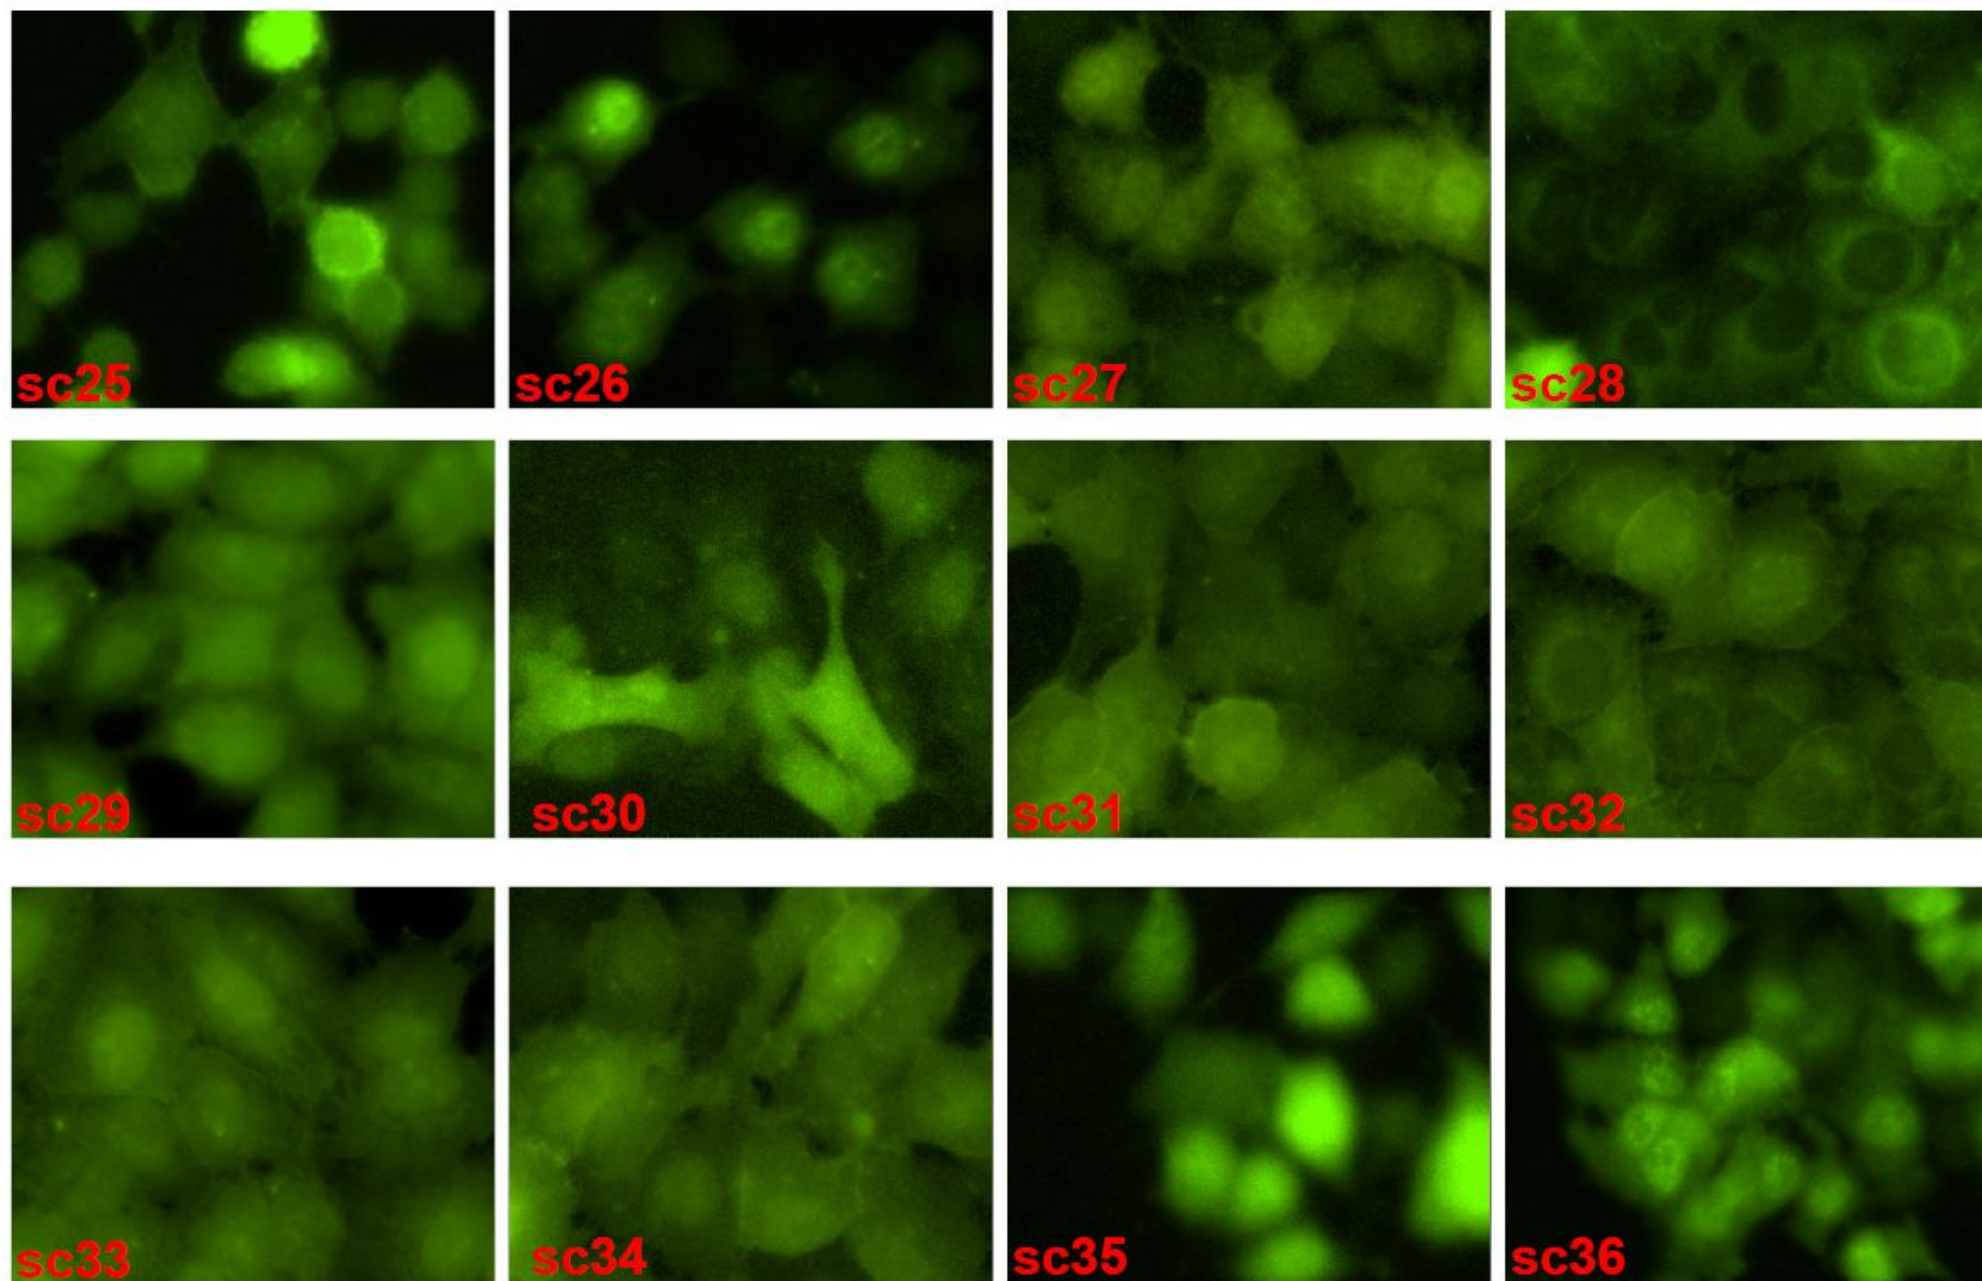



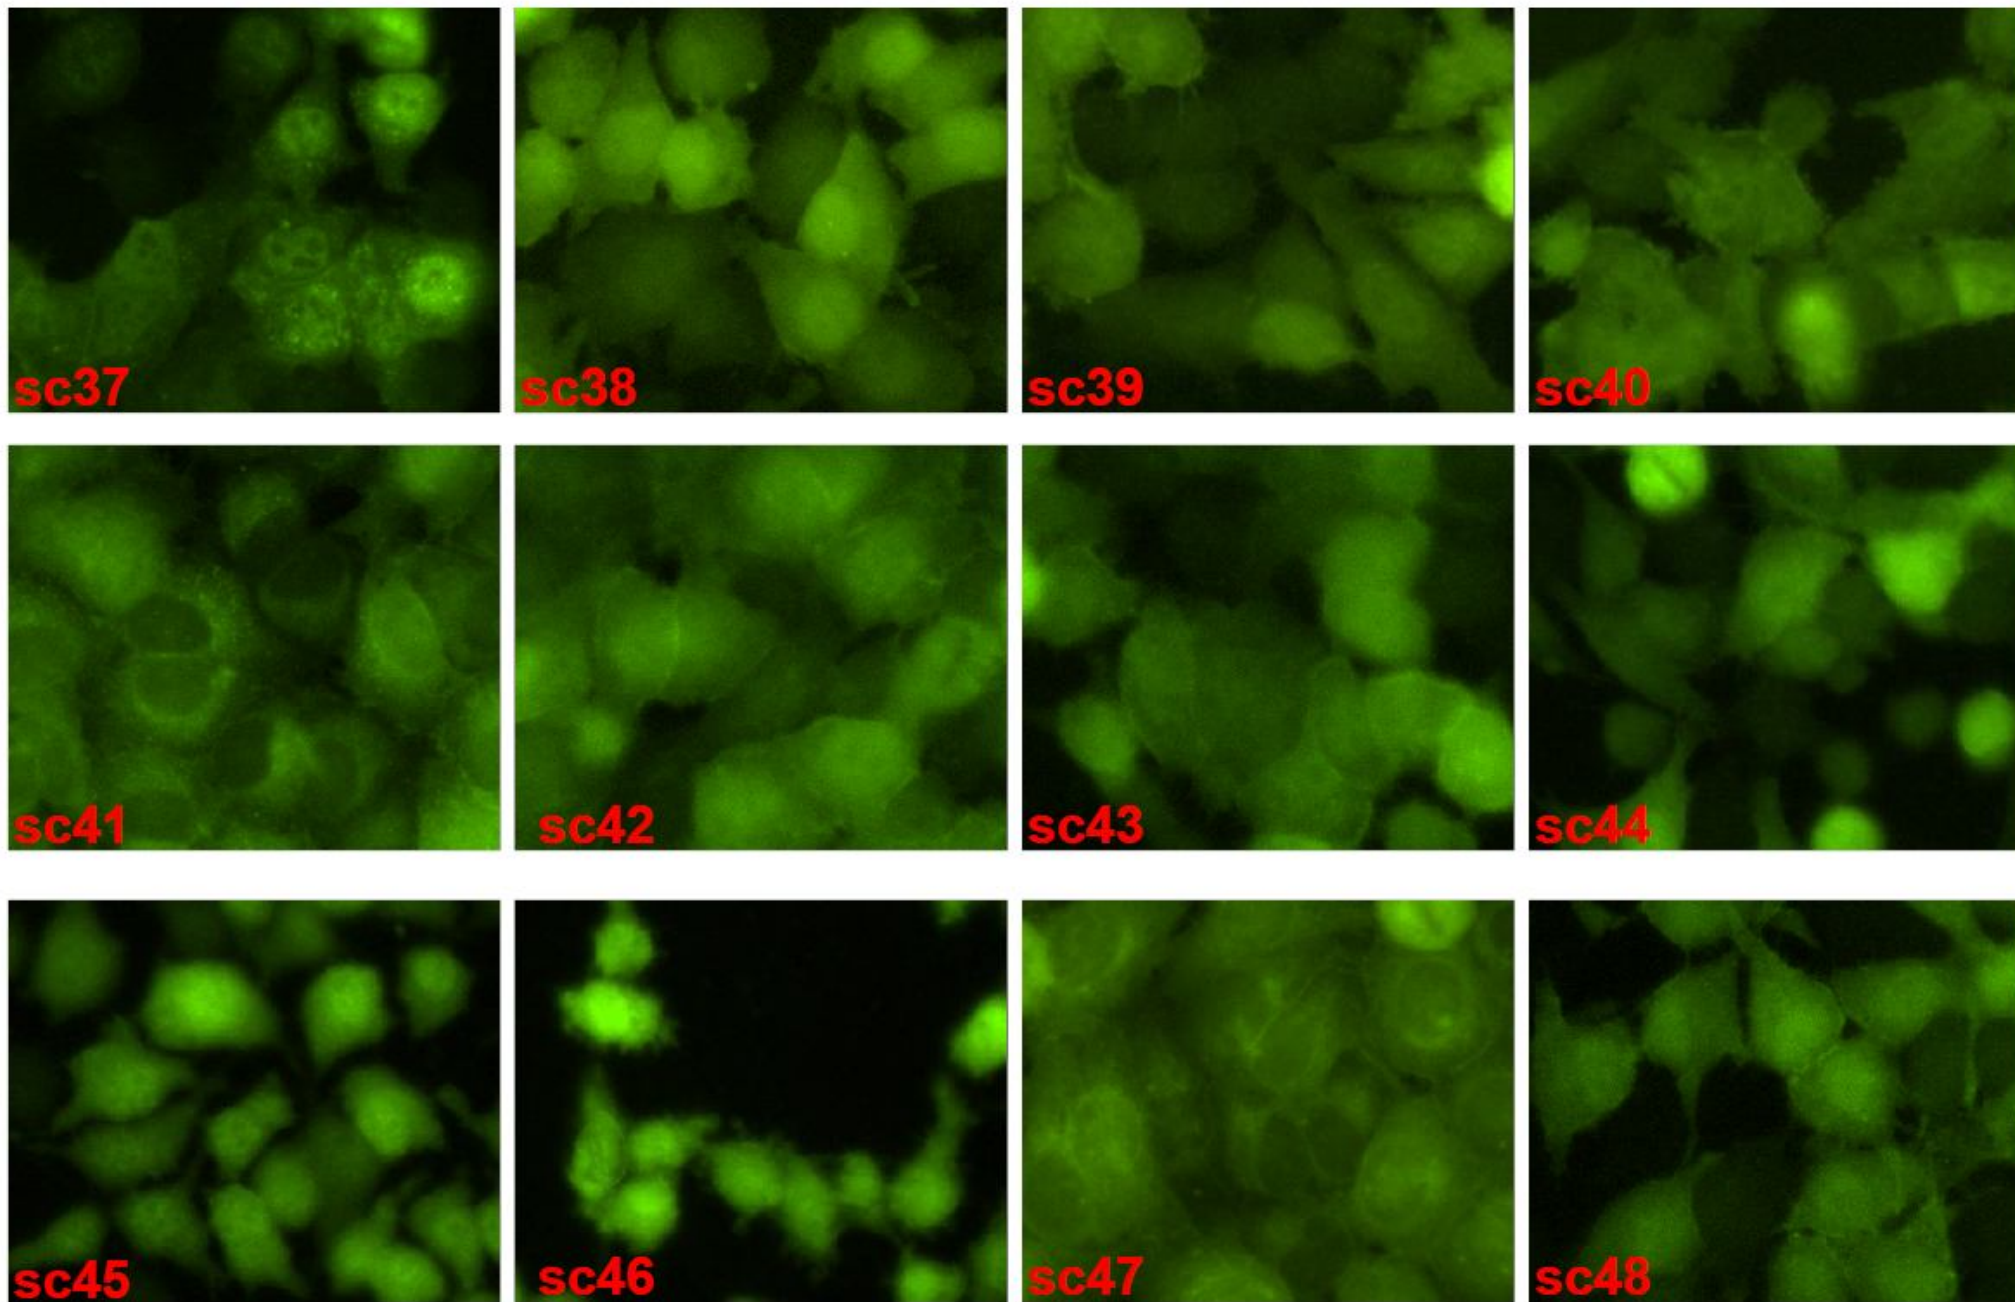

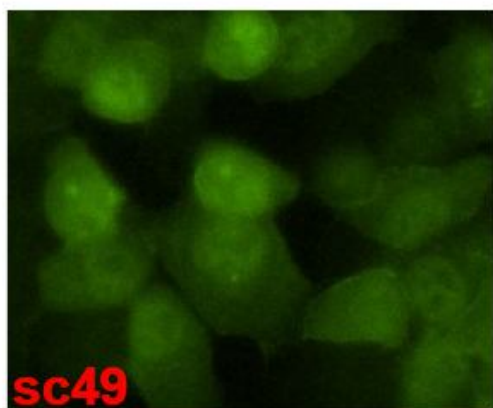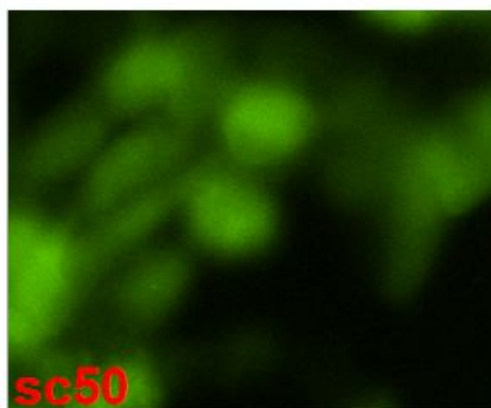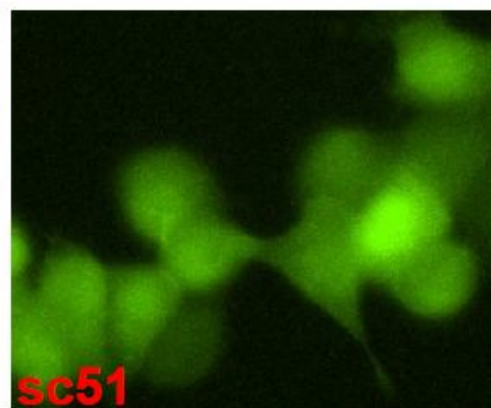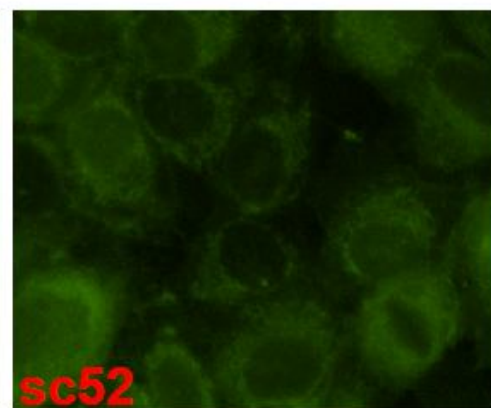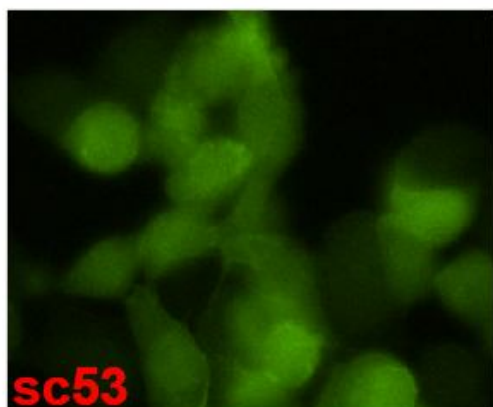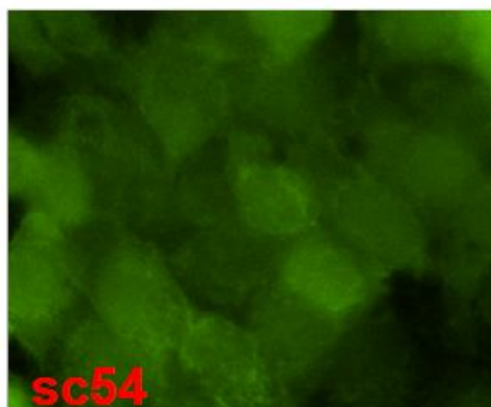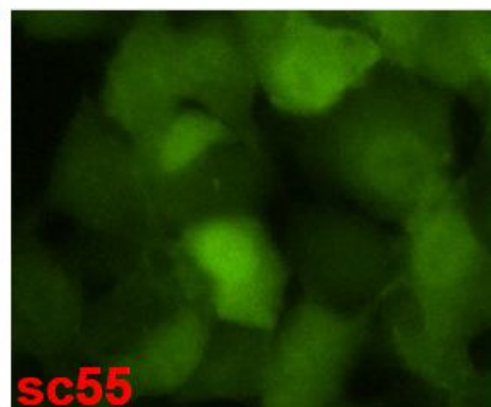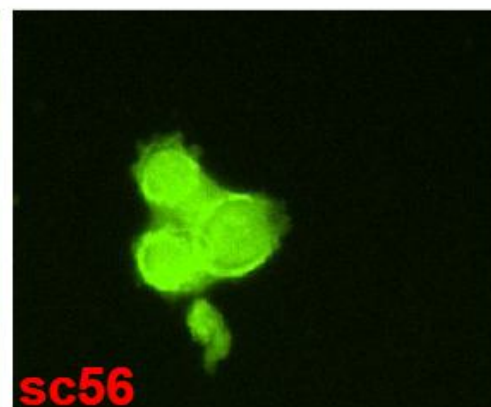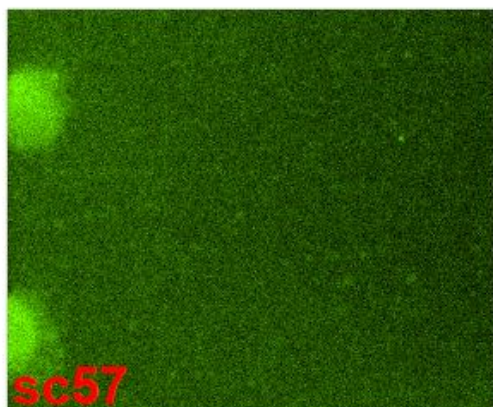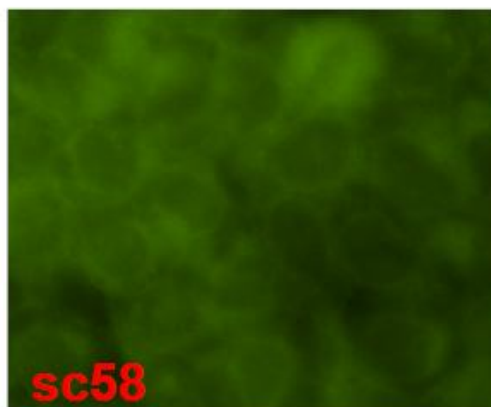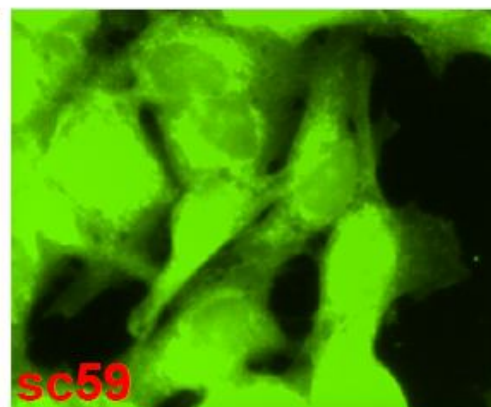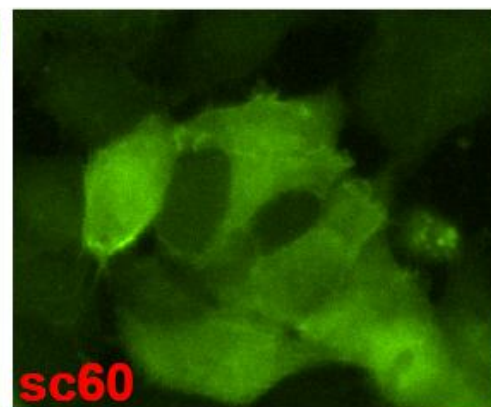



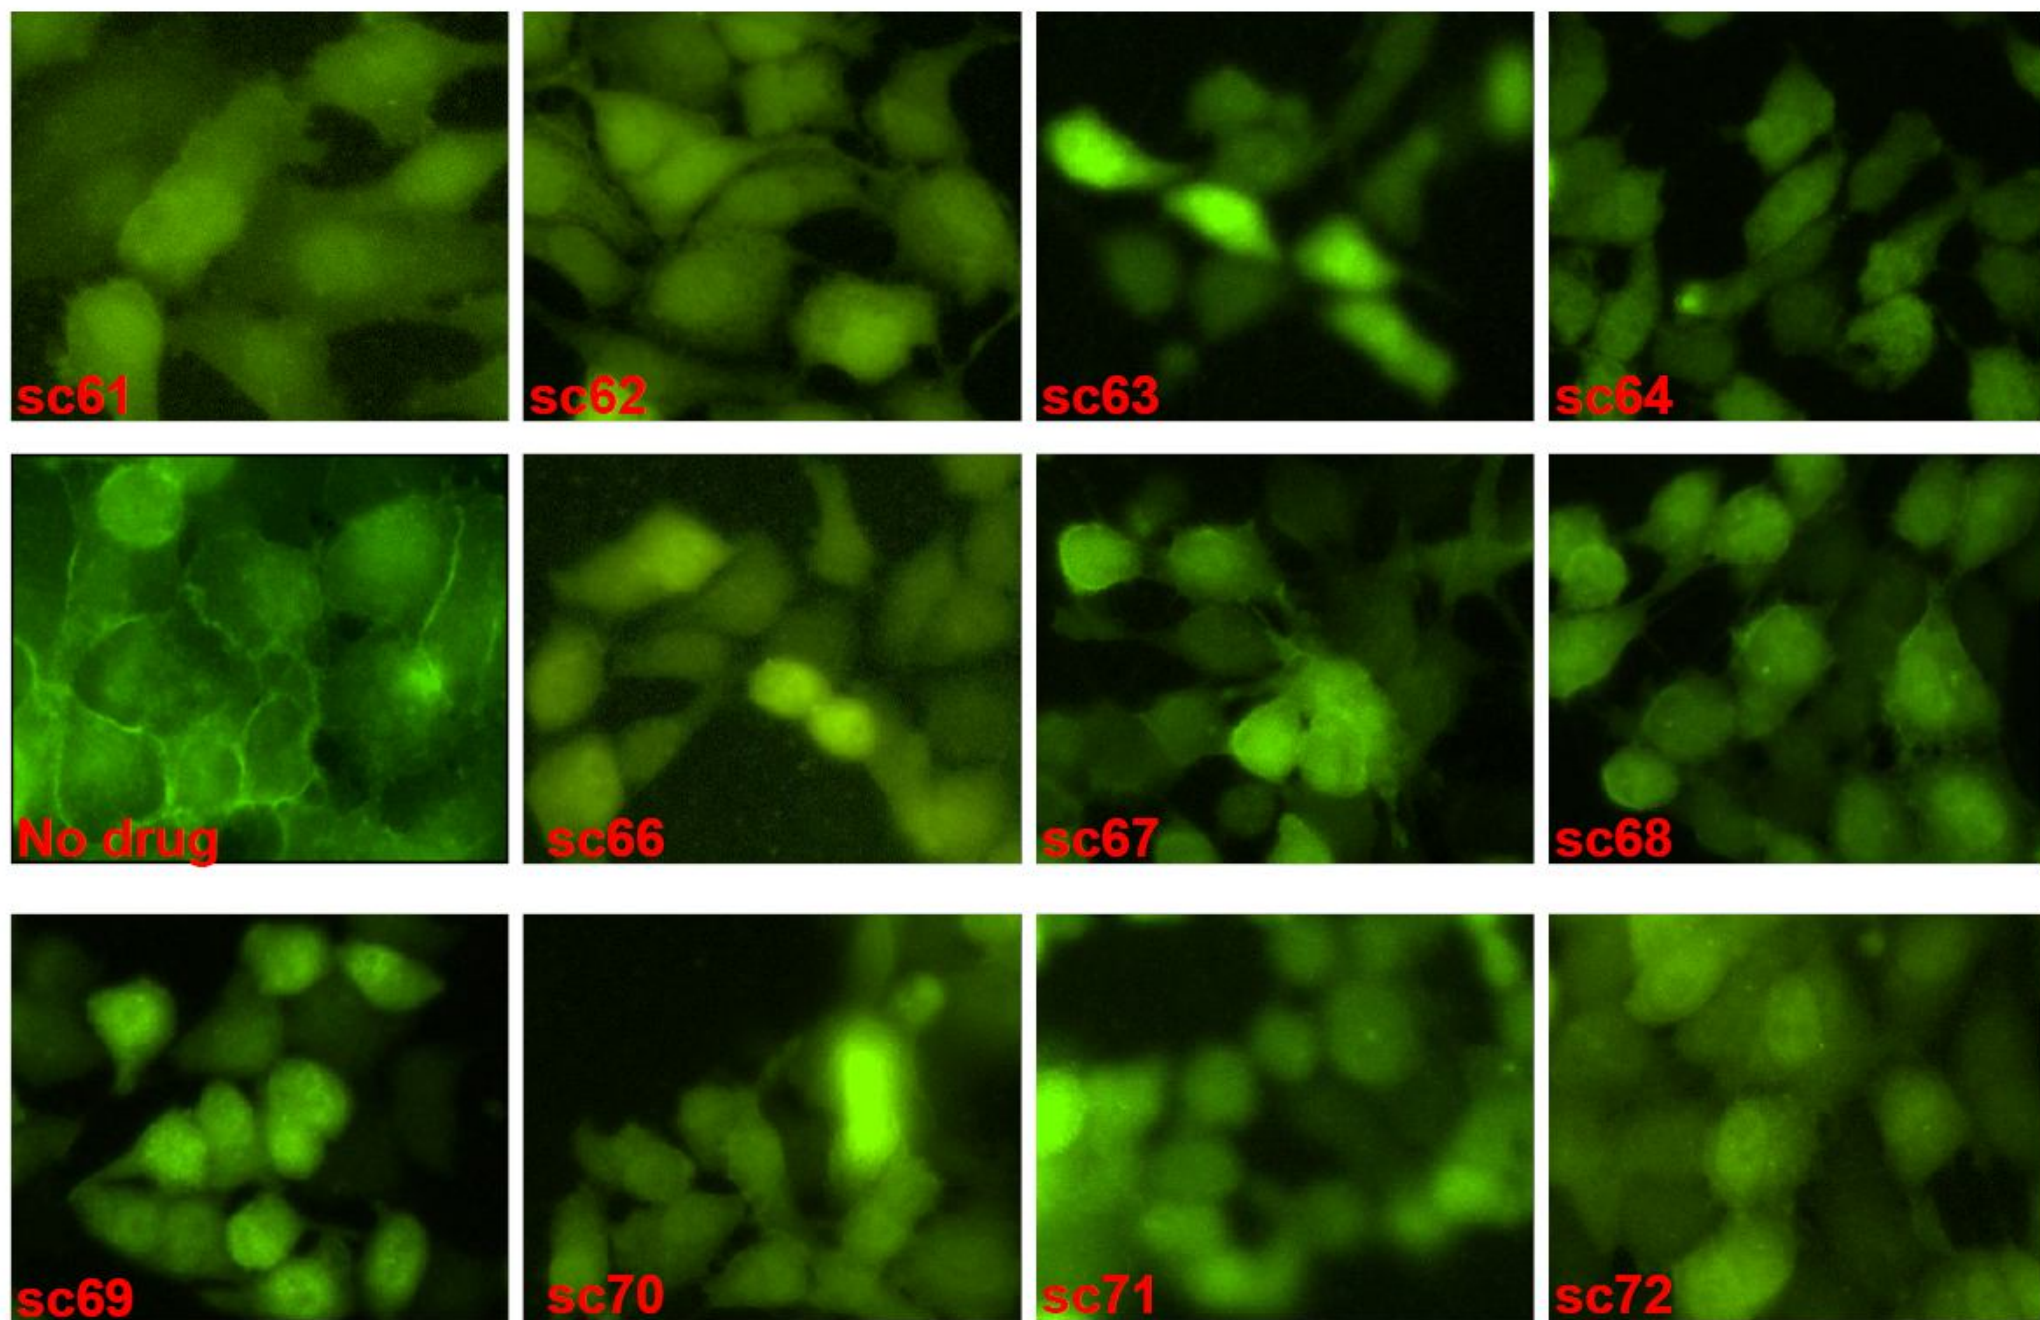

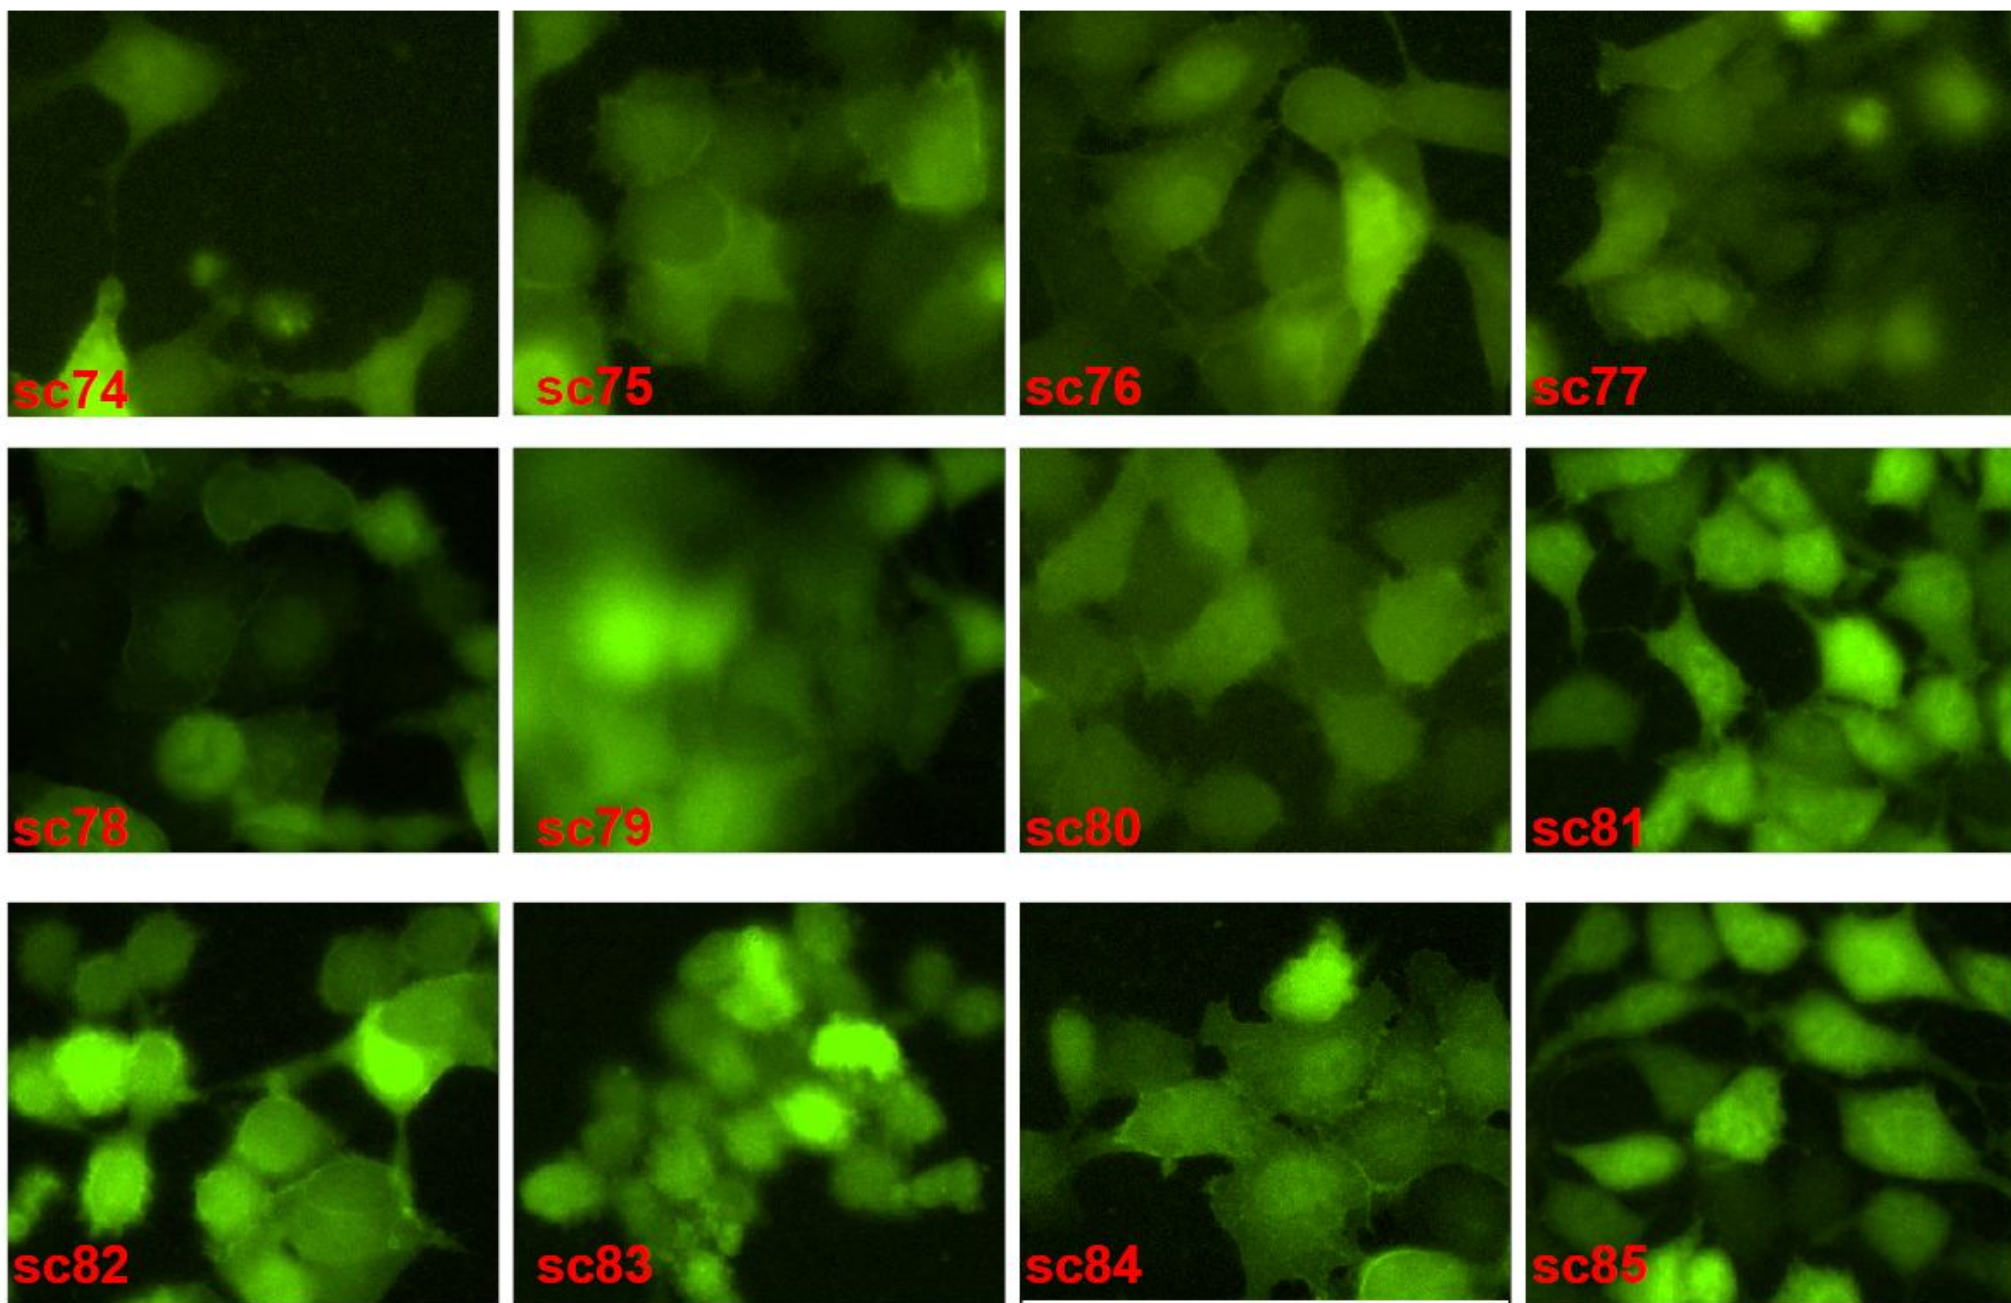



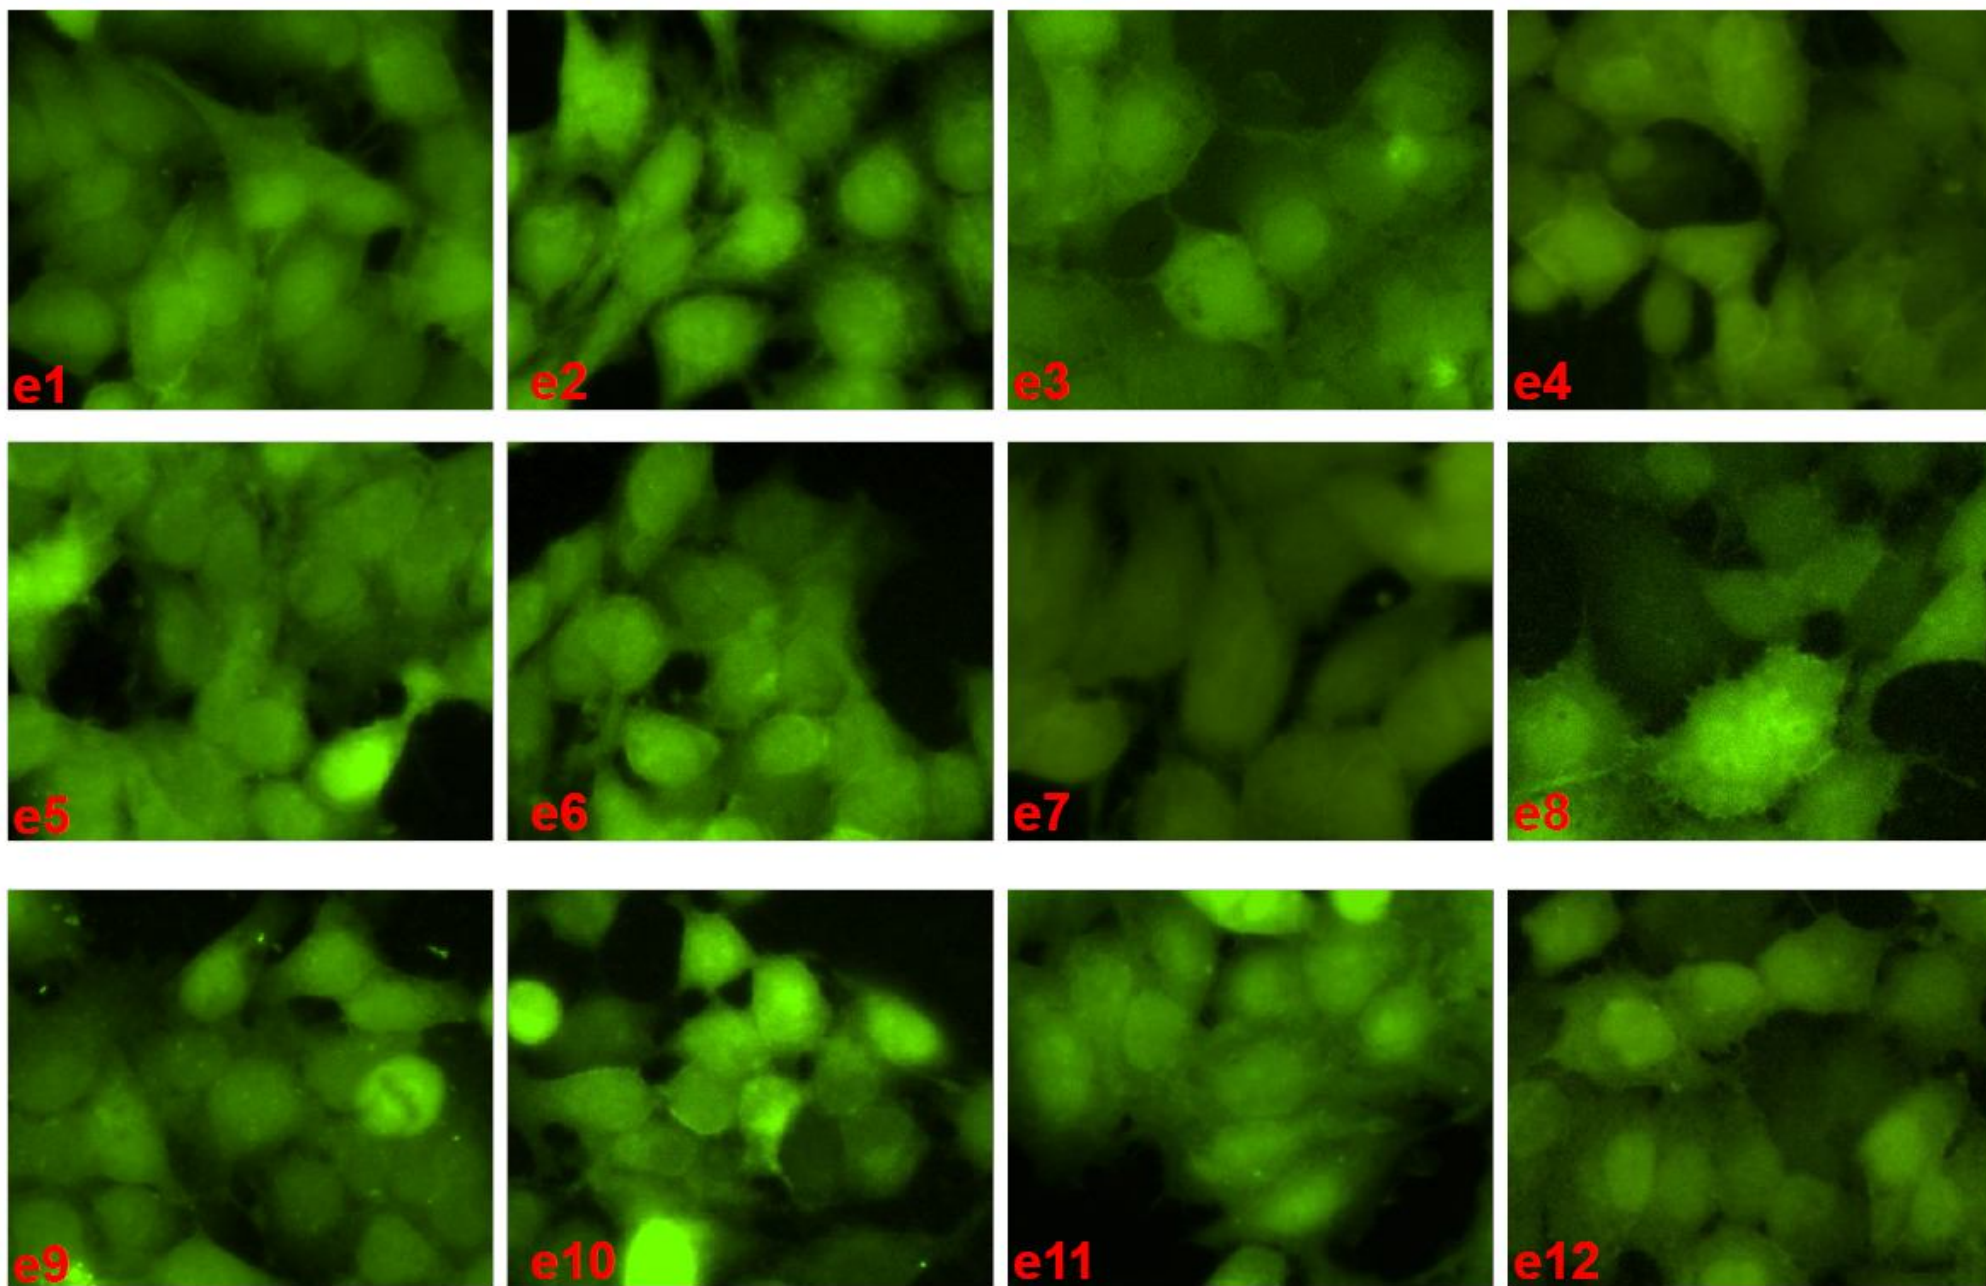

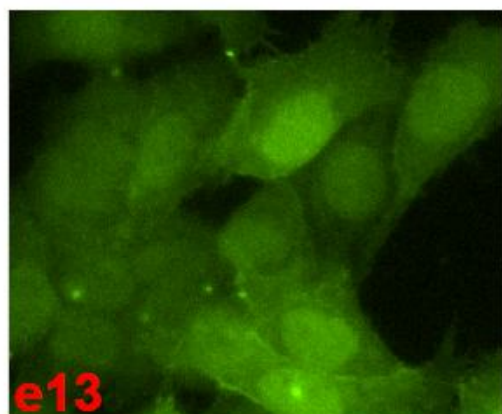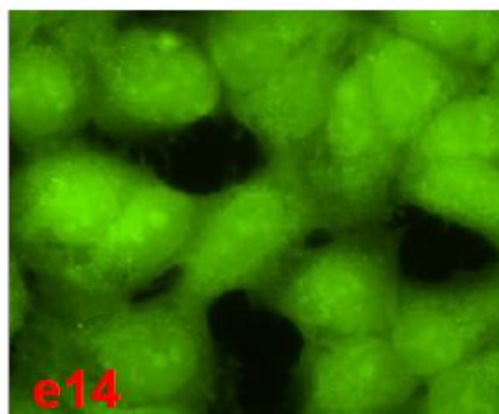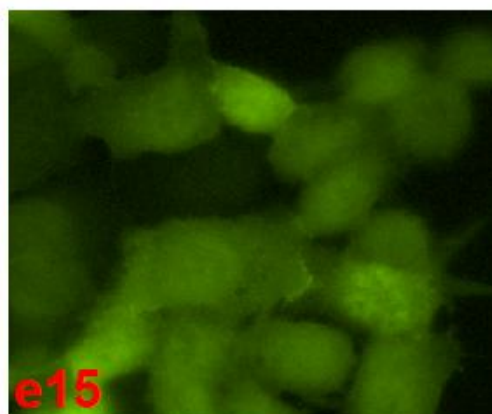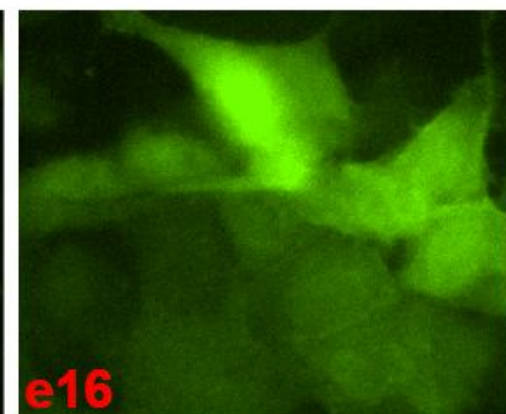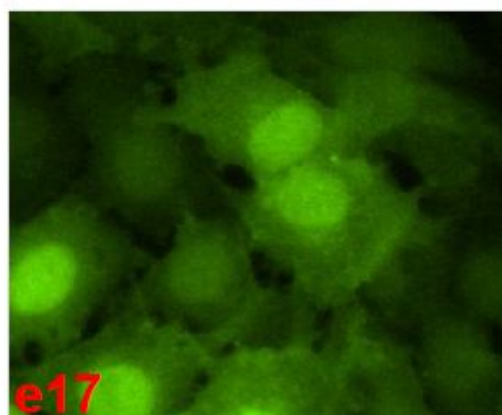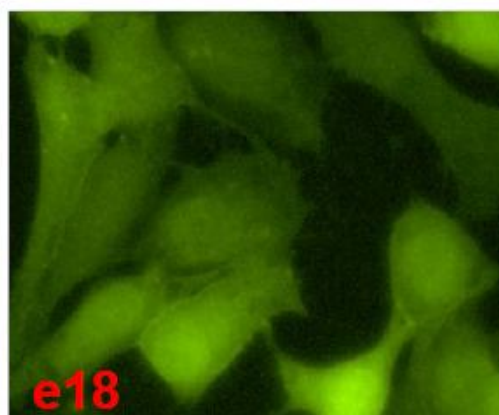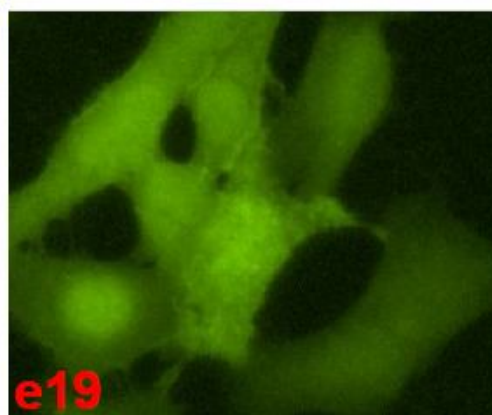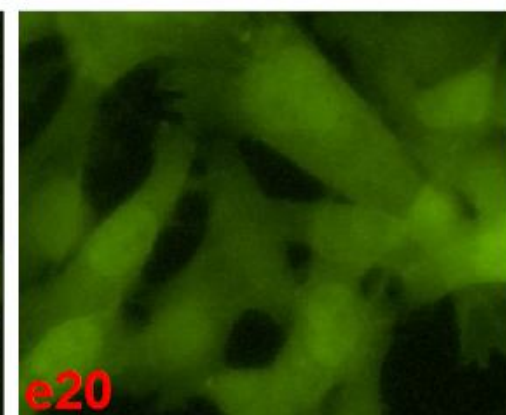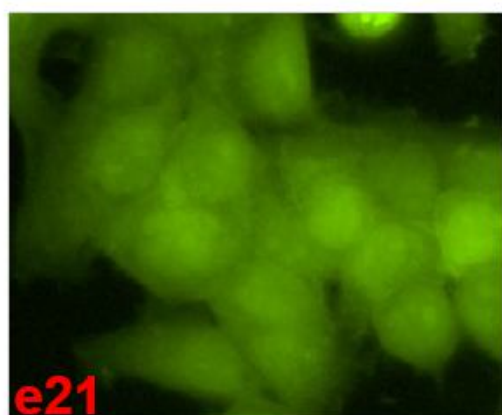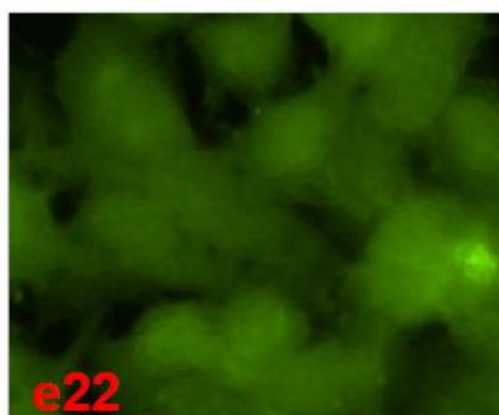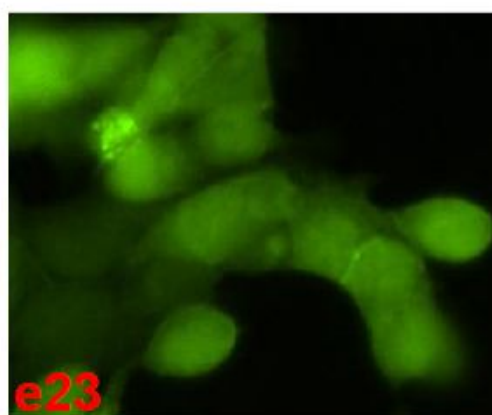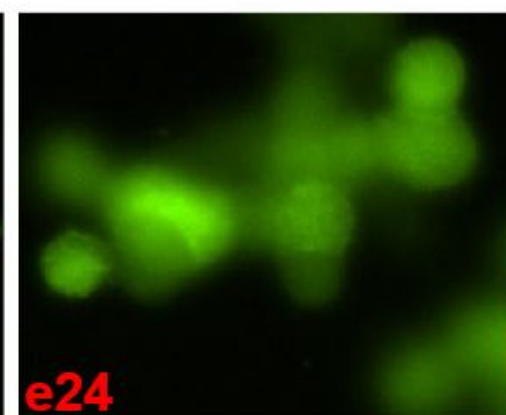



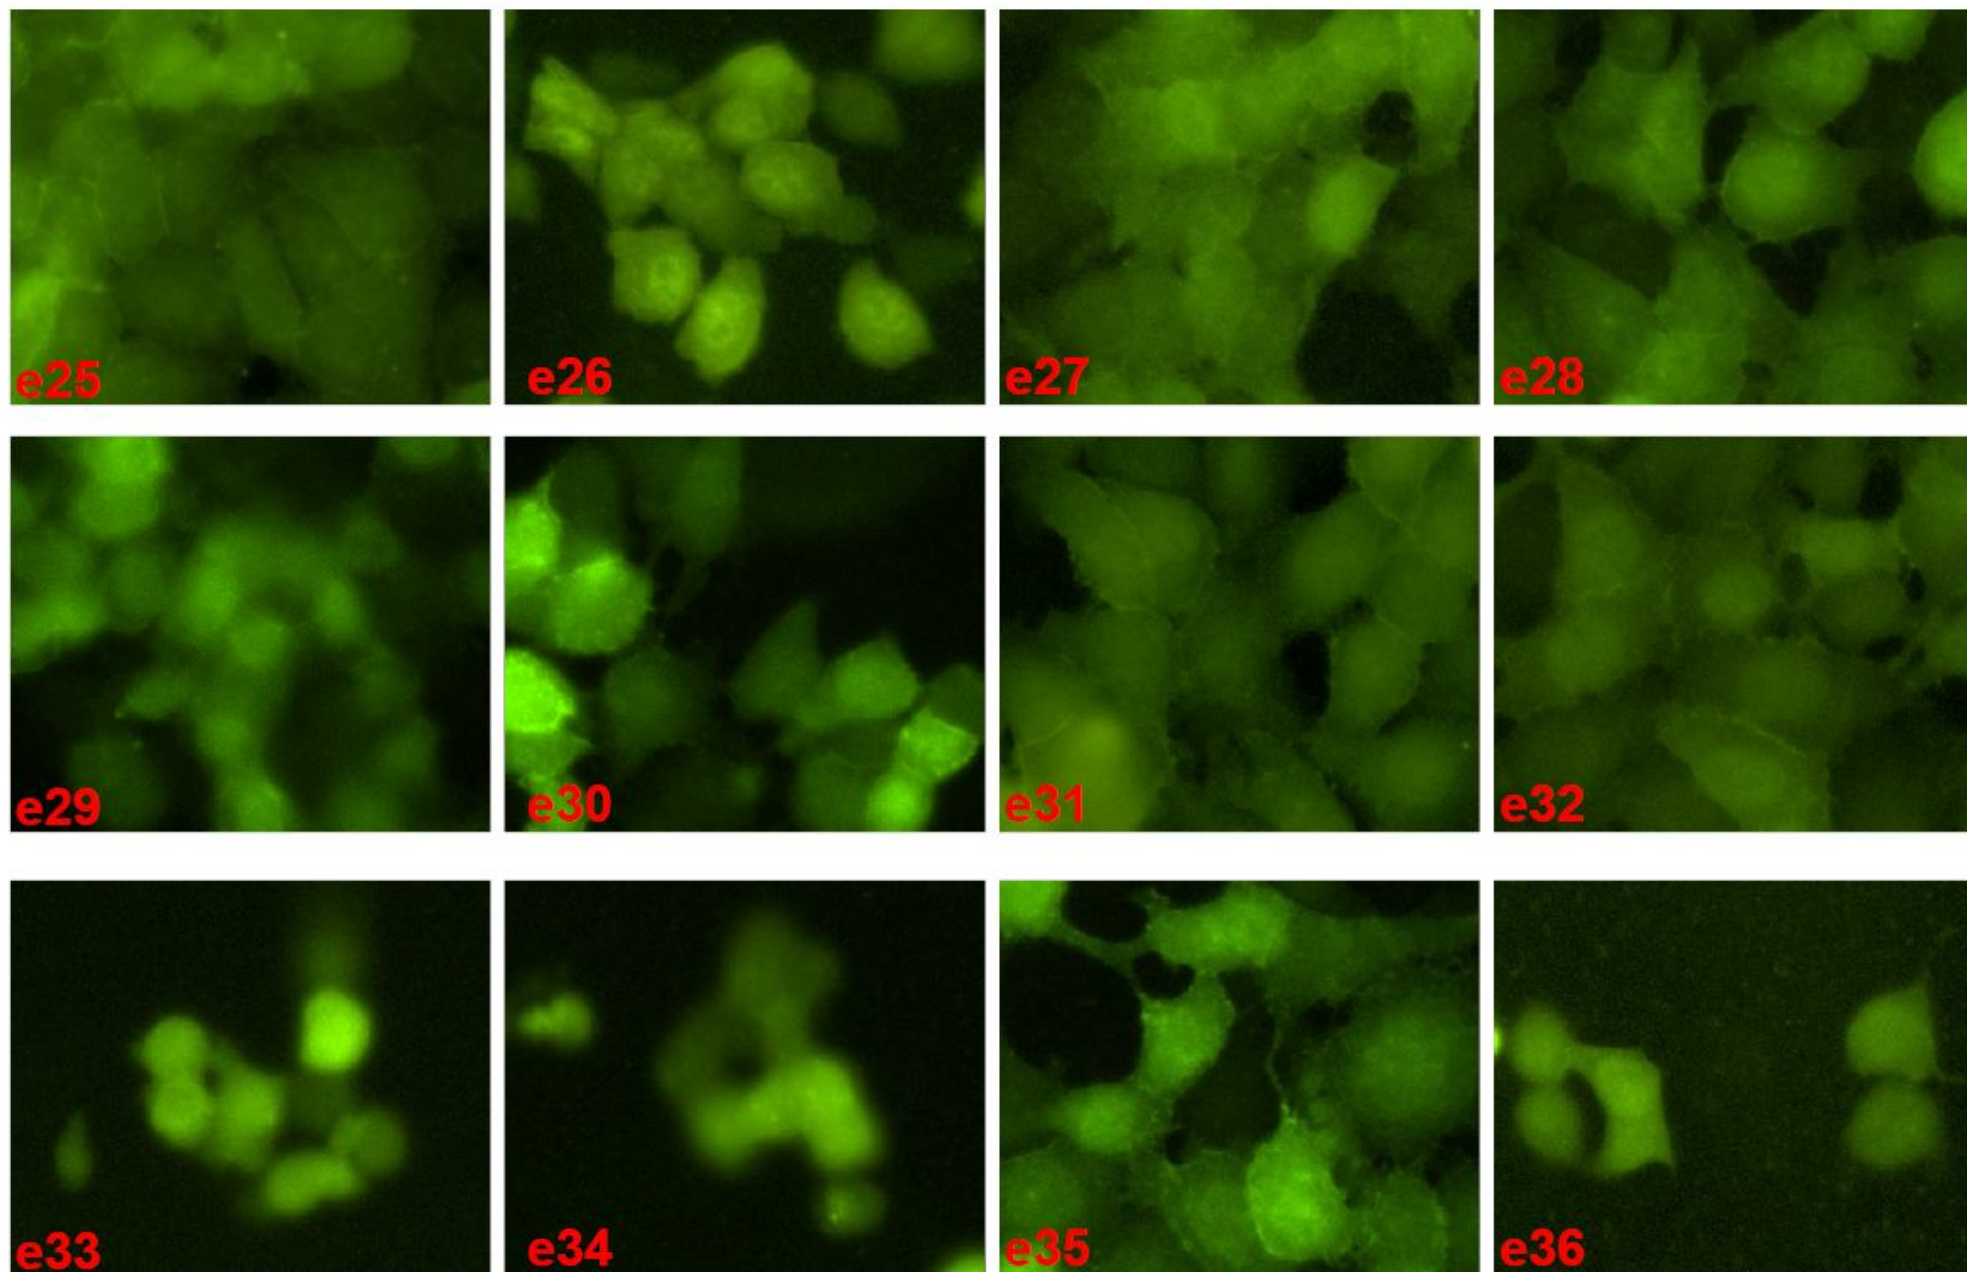

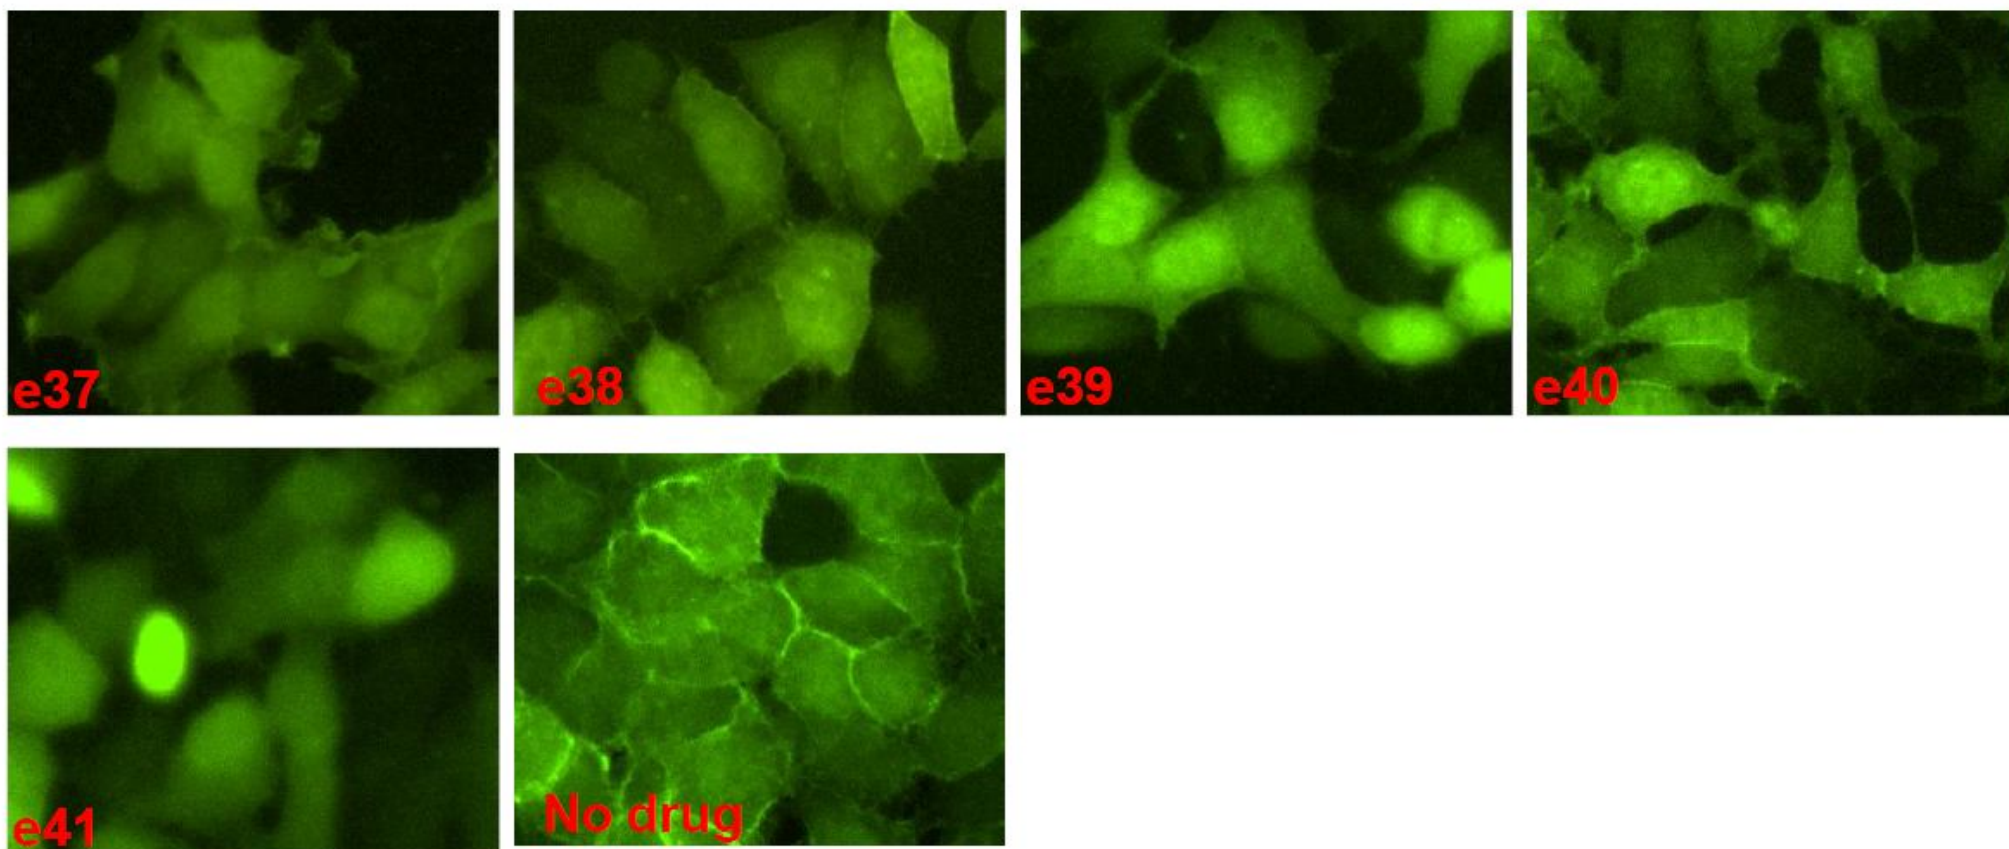

**Figure S5.** Positive hit compounds identified from the primary and secondary high throughput screenings.



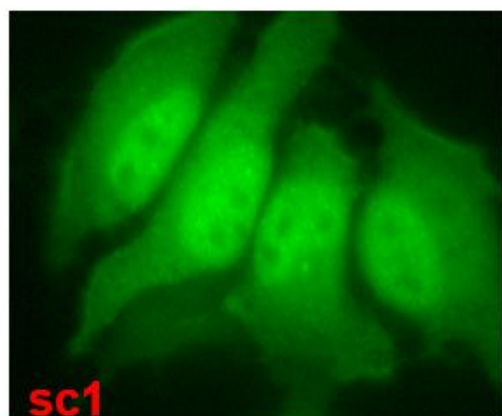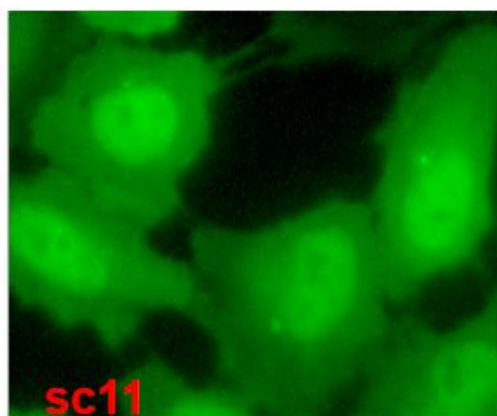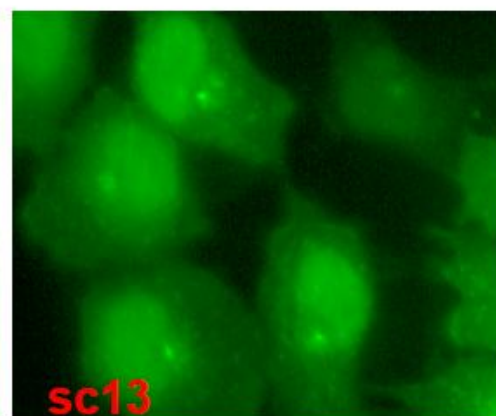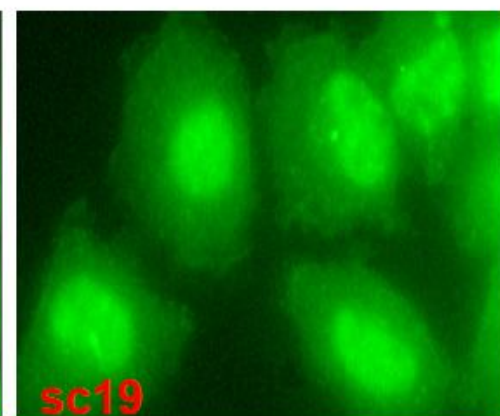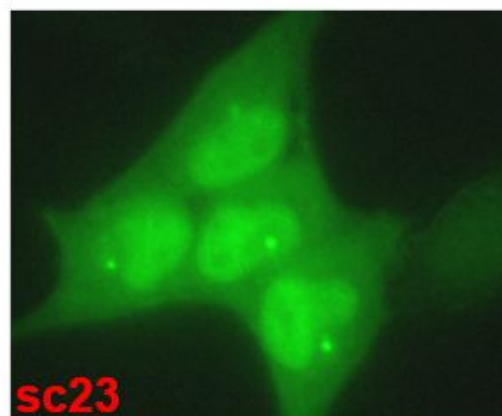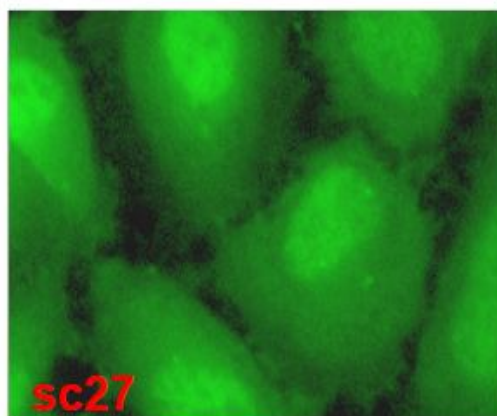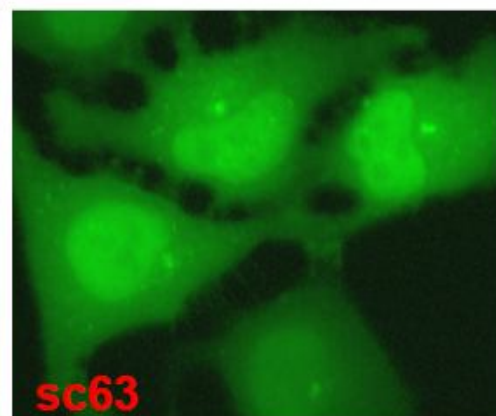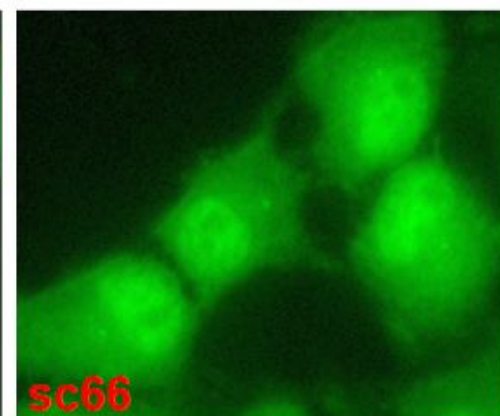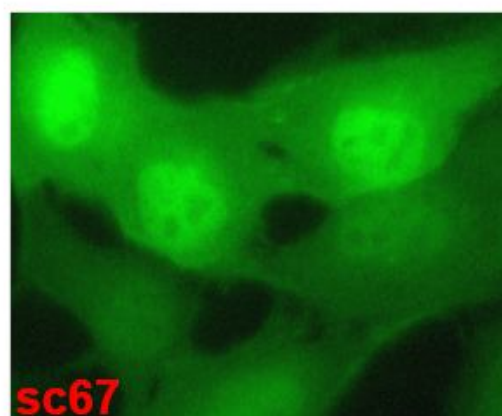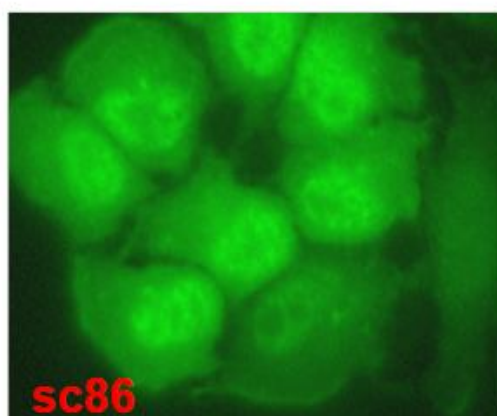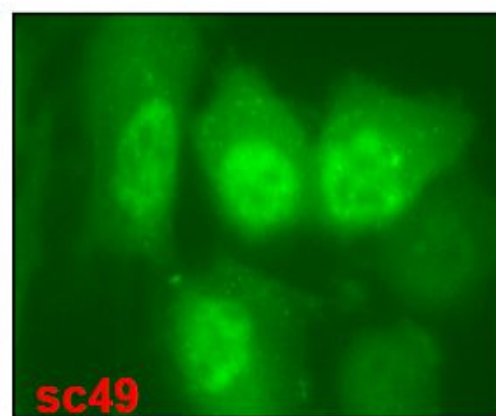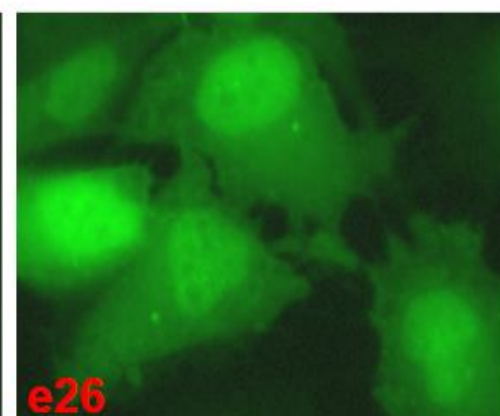

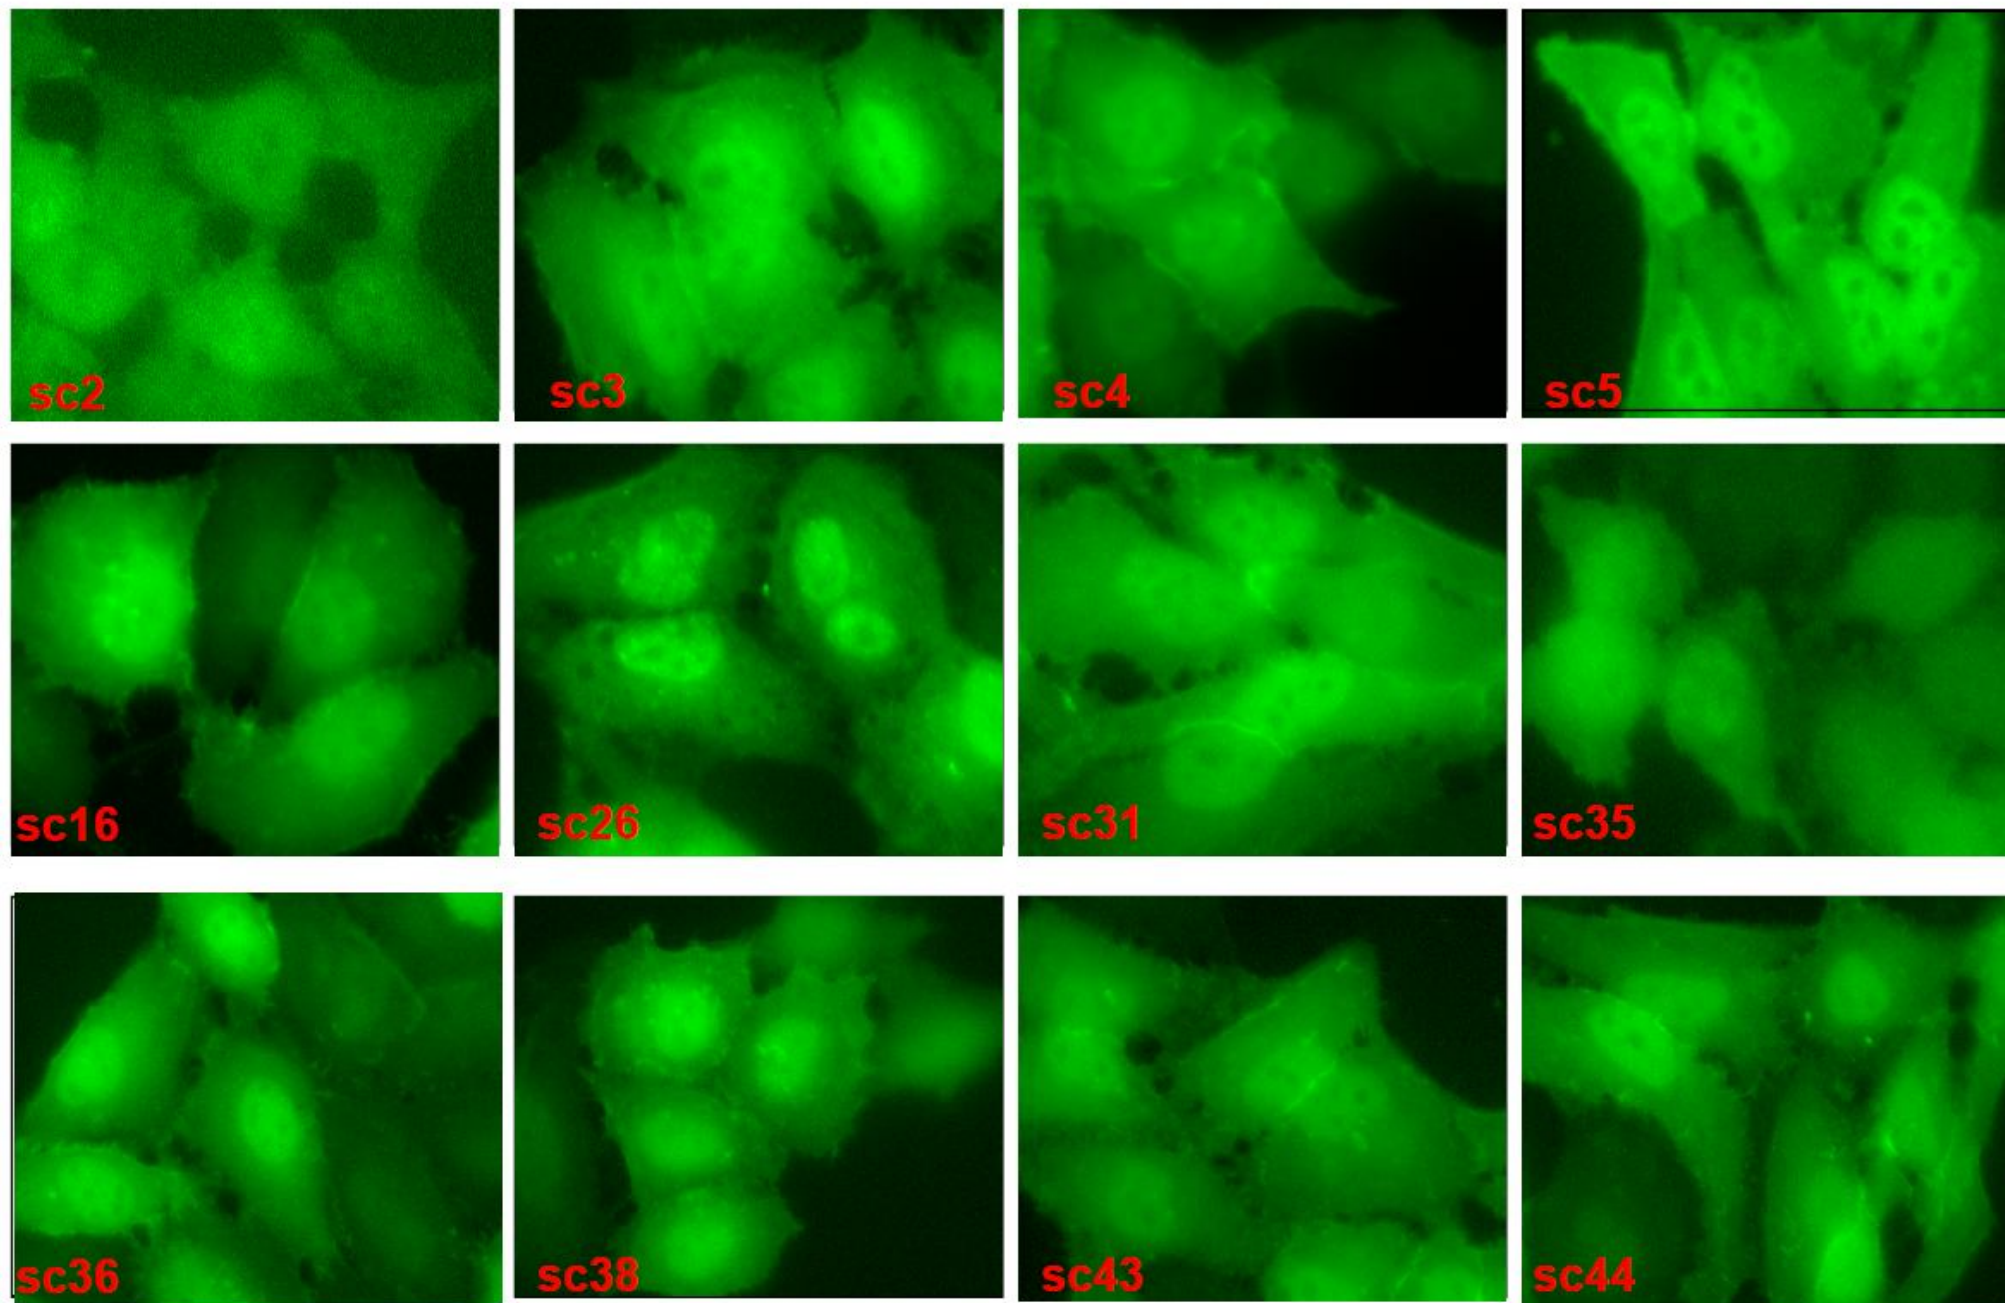



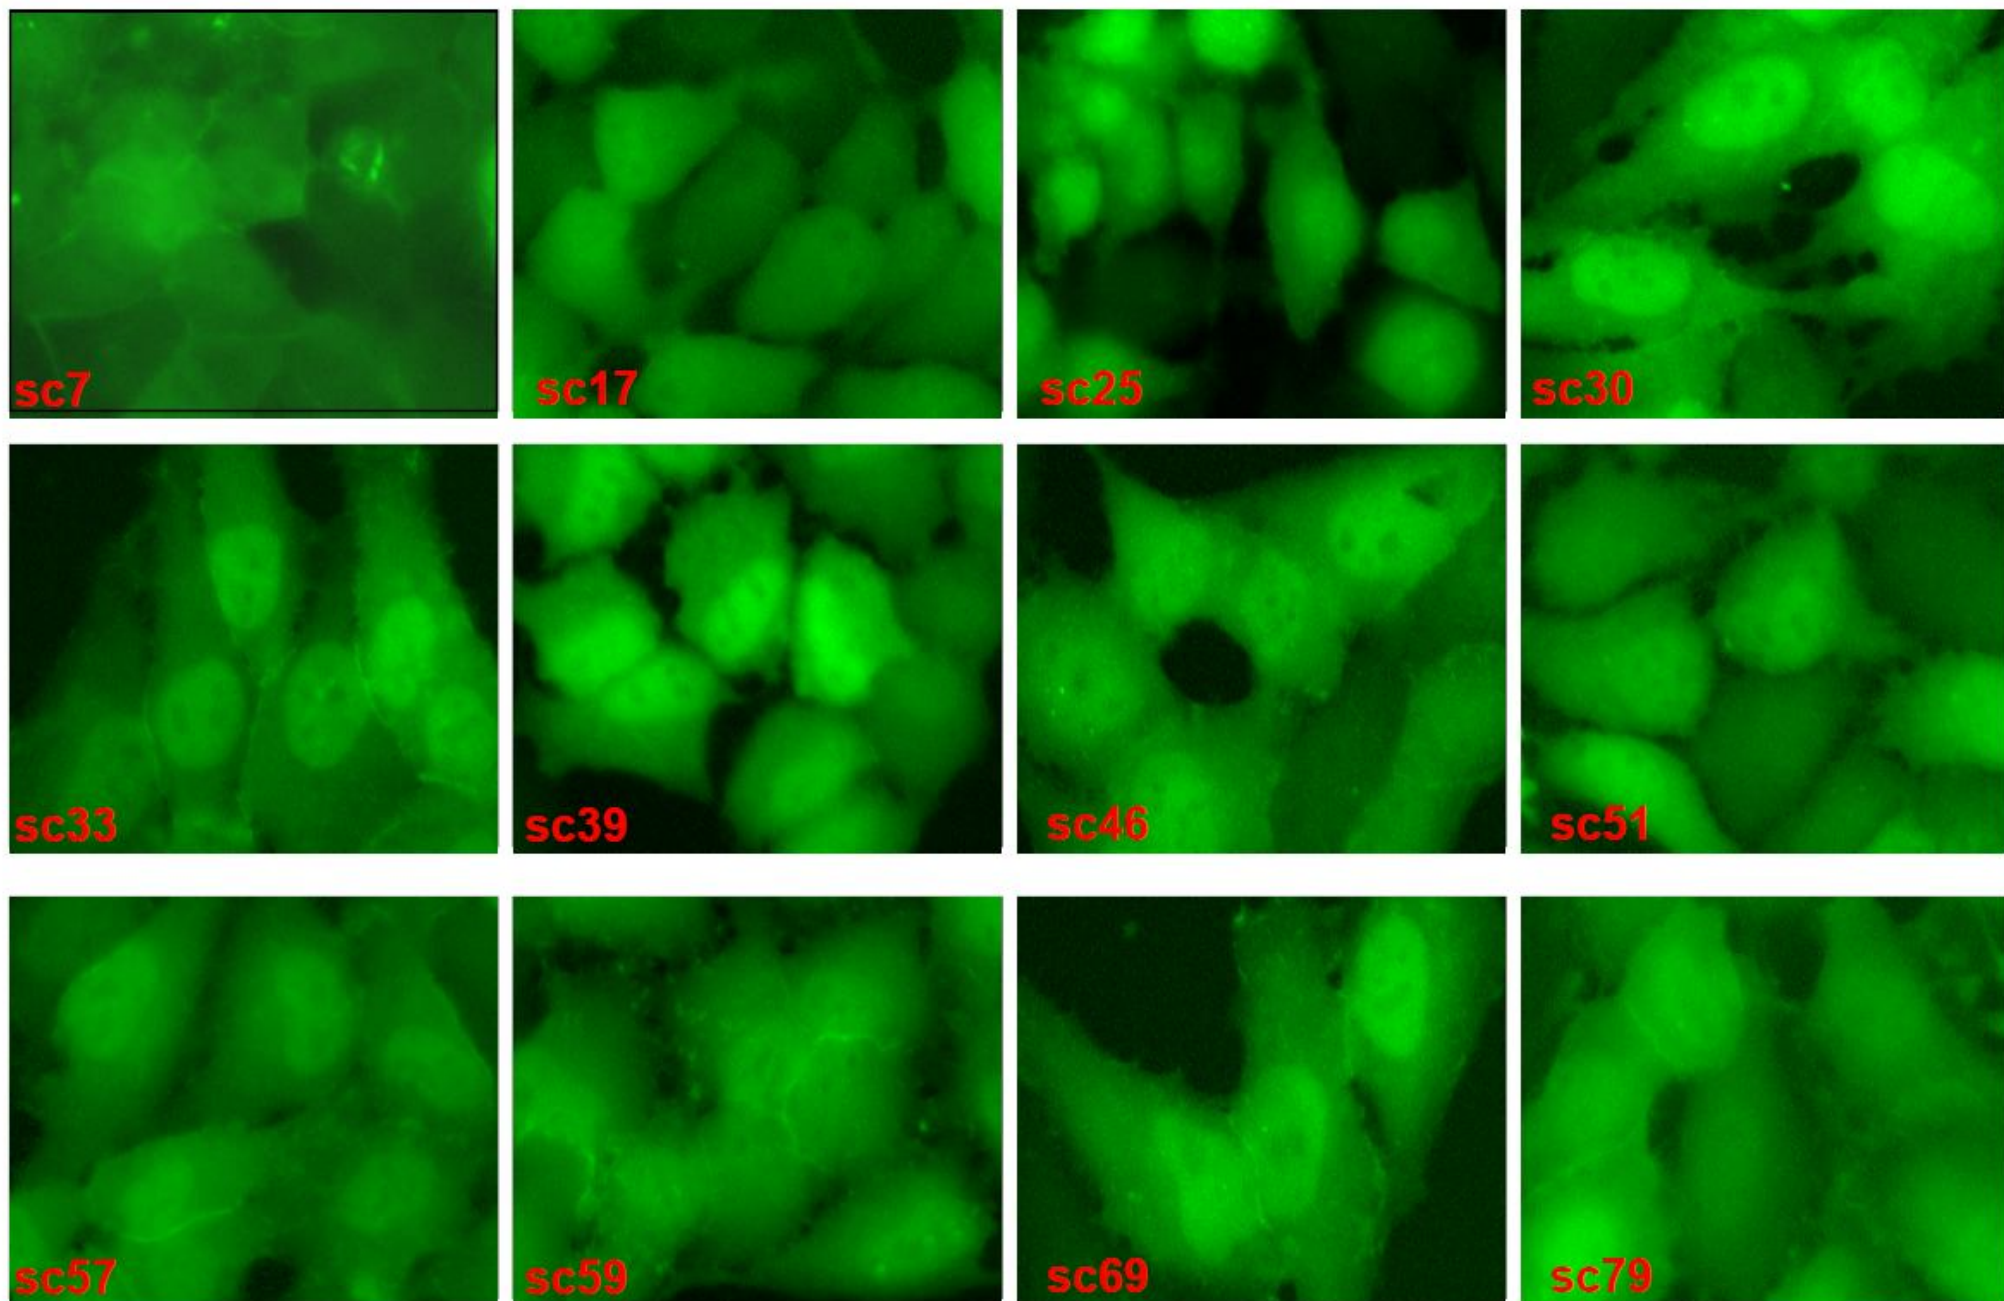

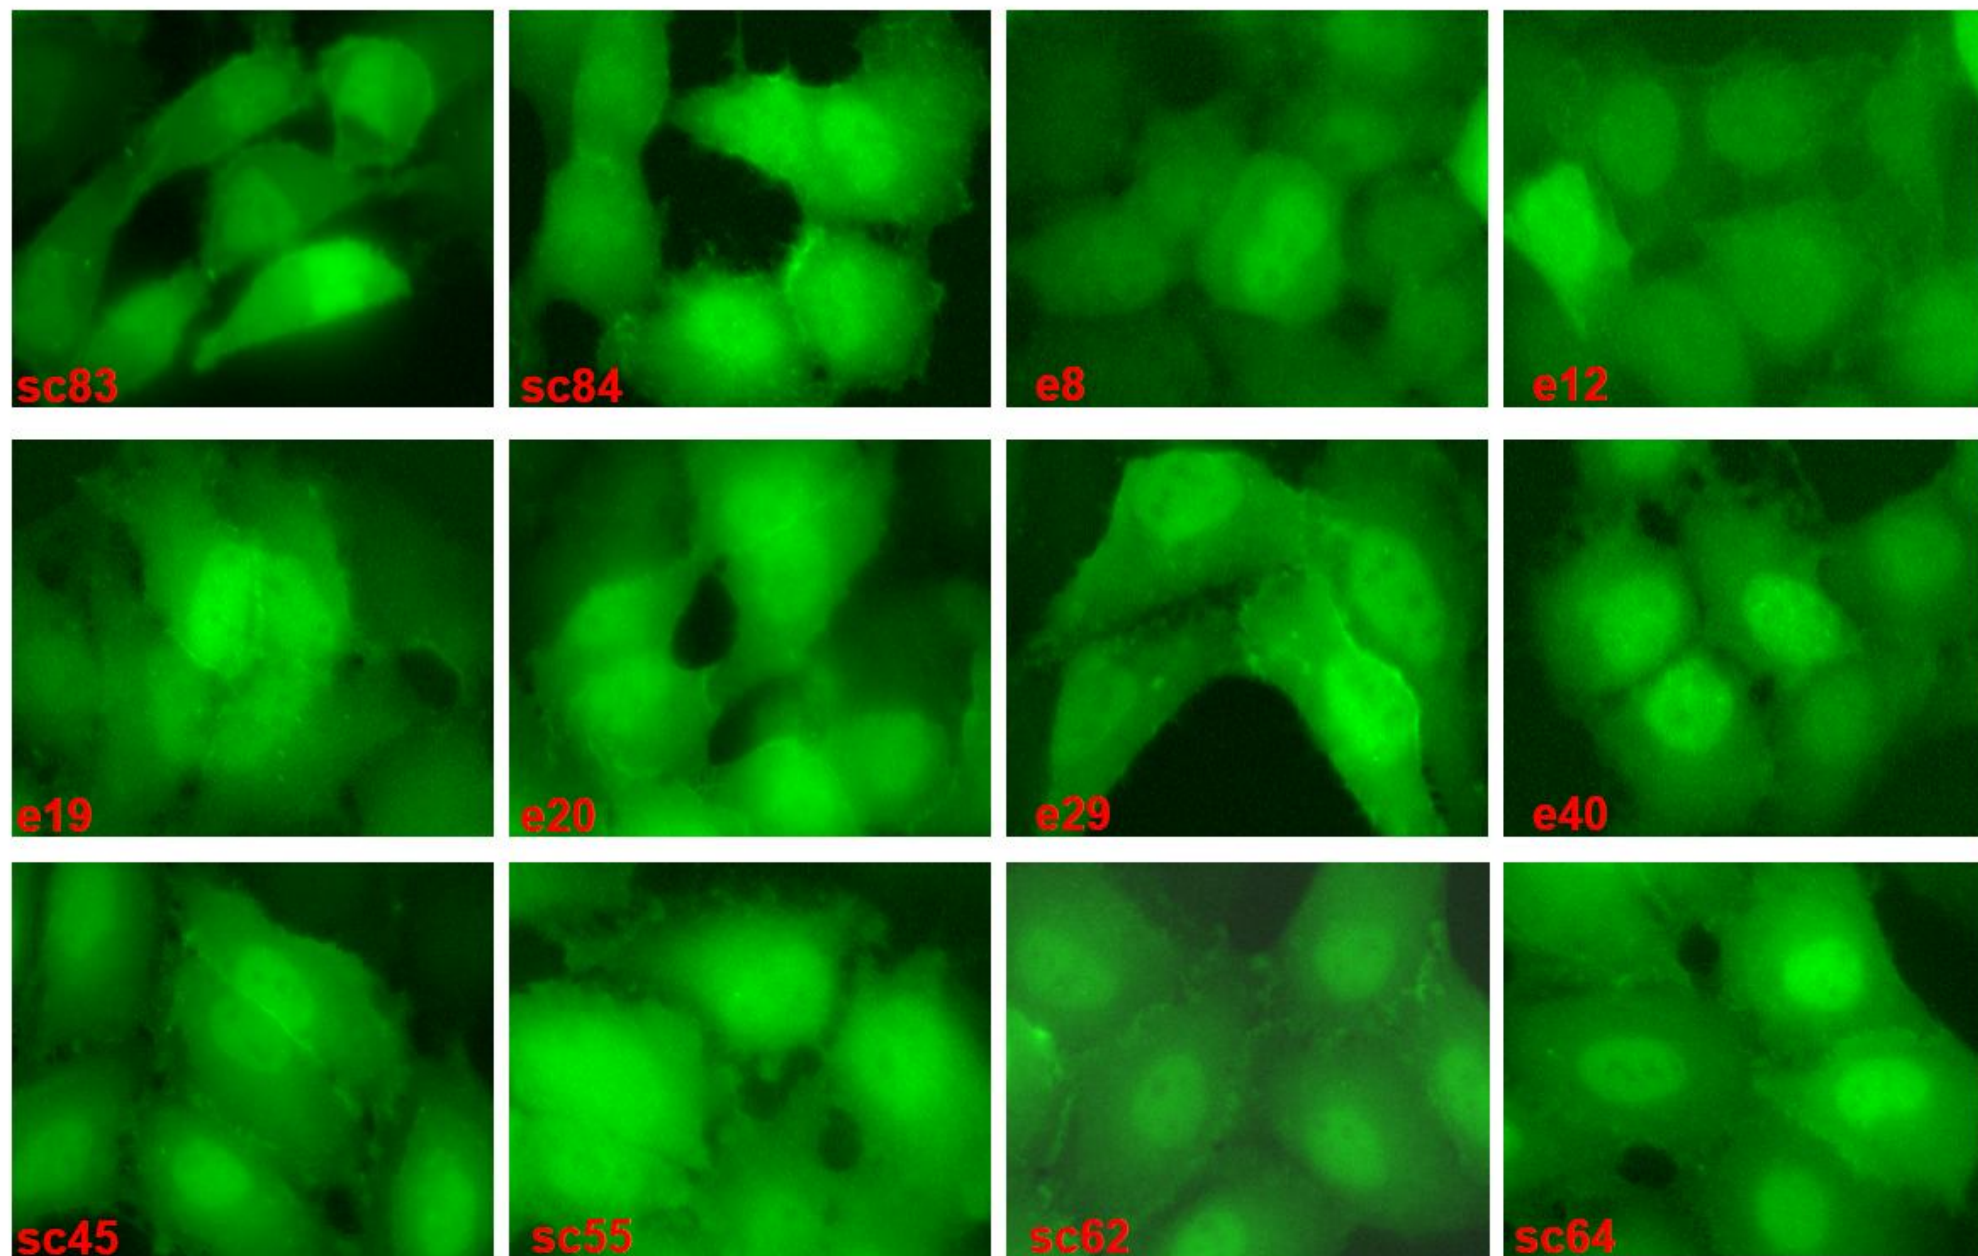



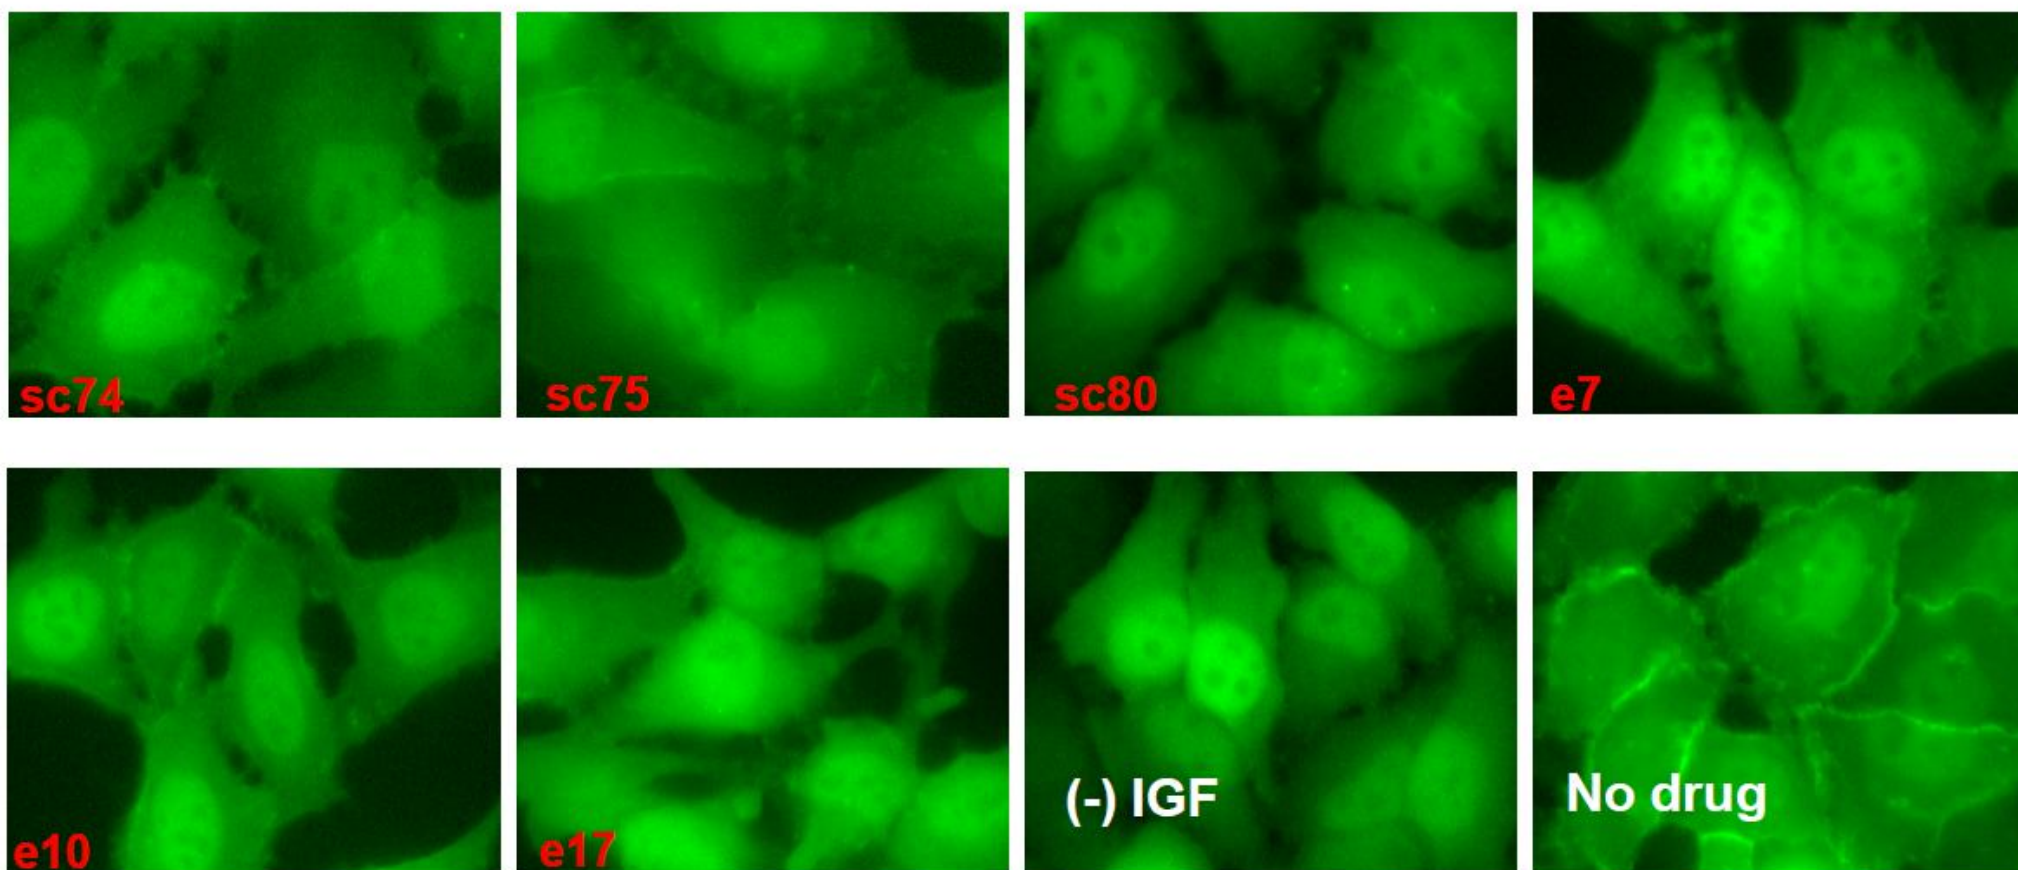

**Figure S6.** Positive hit compounds confirmed by live cell imaging.

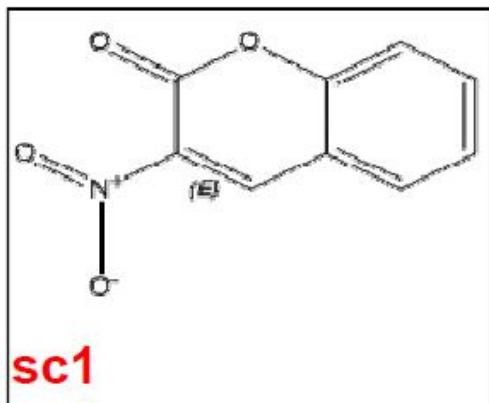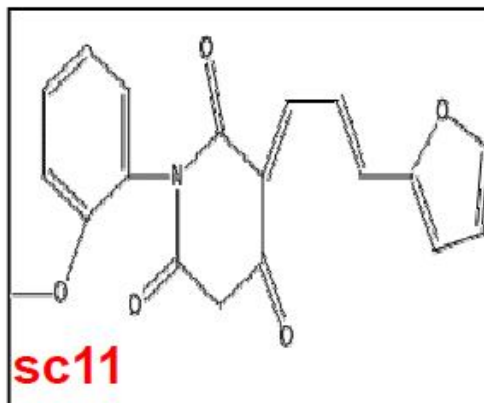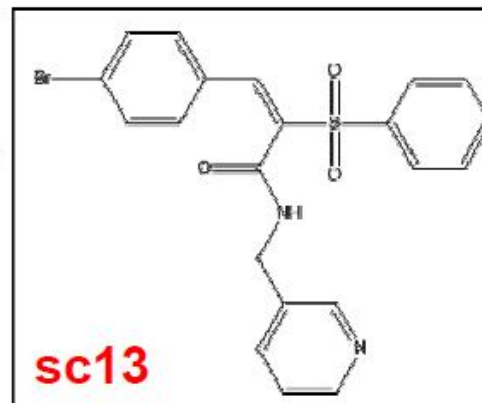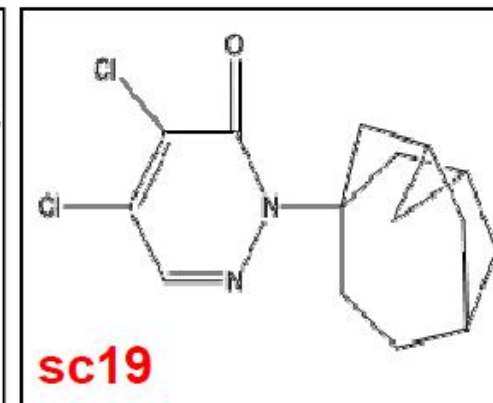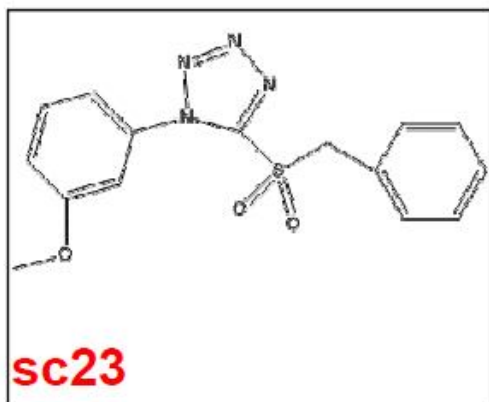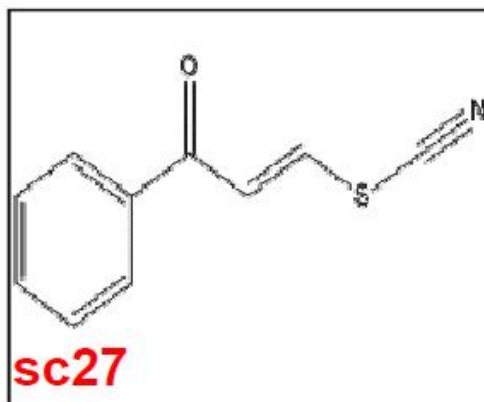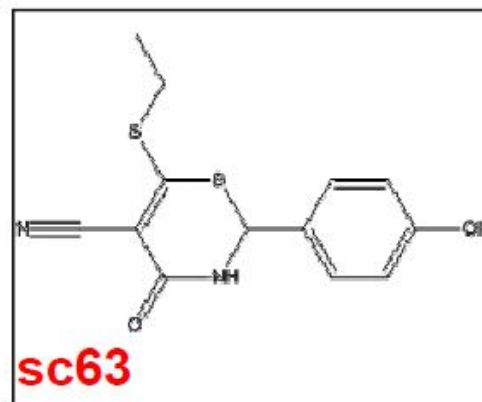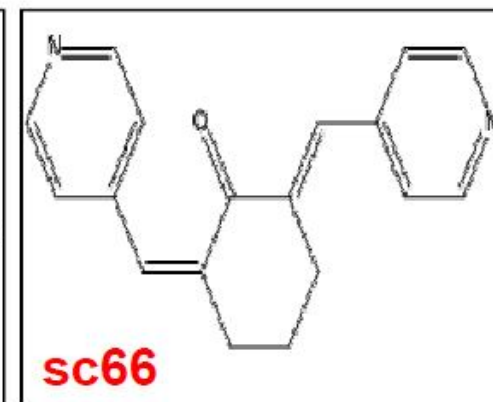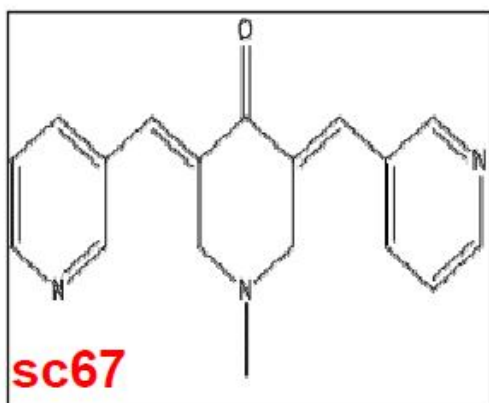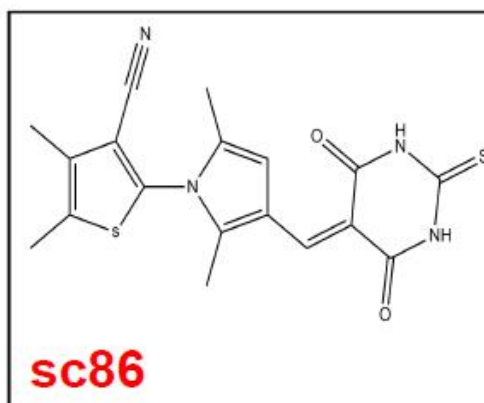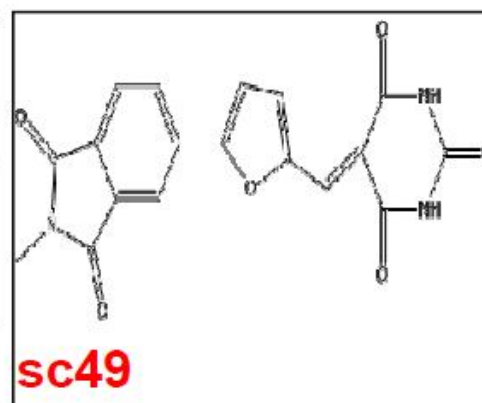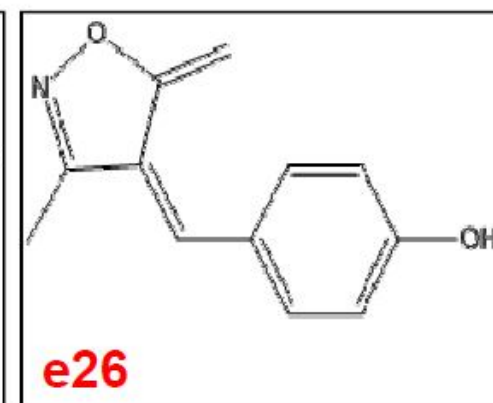

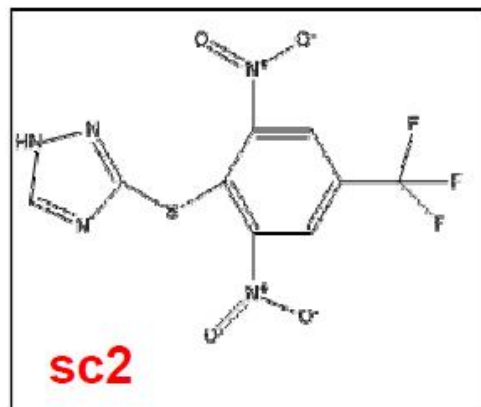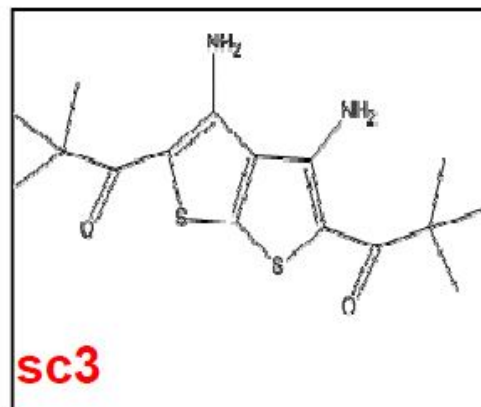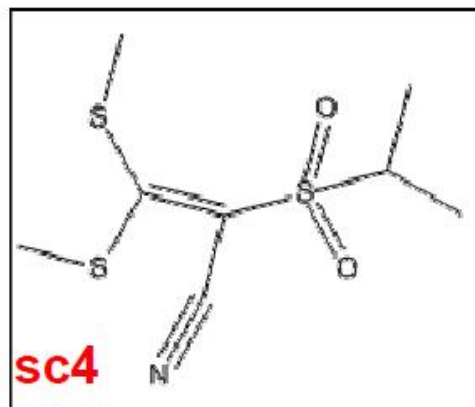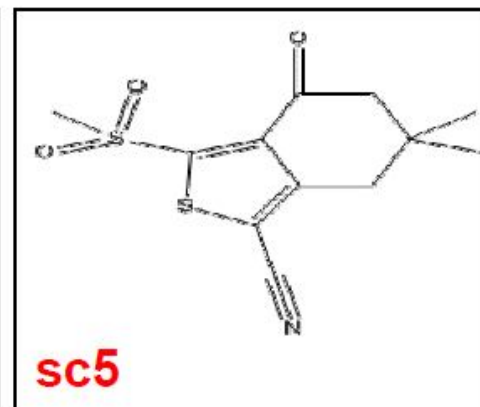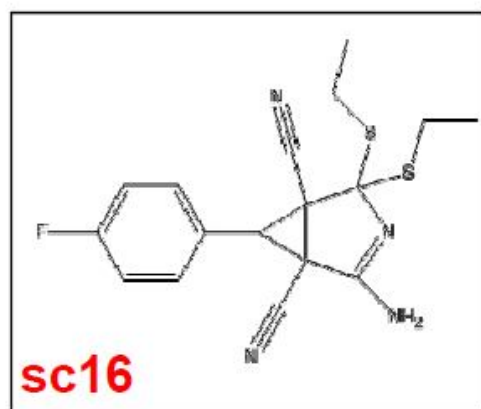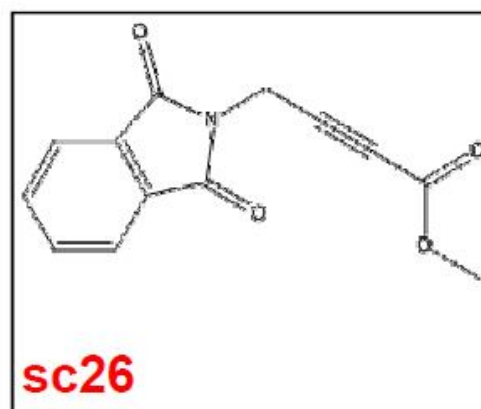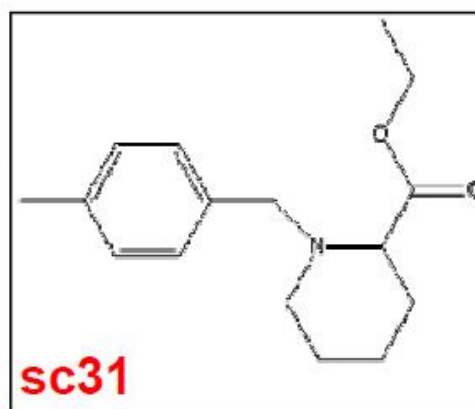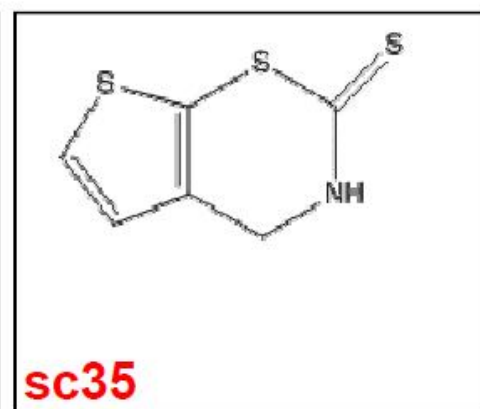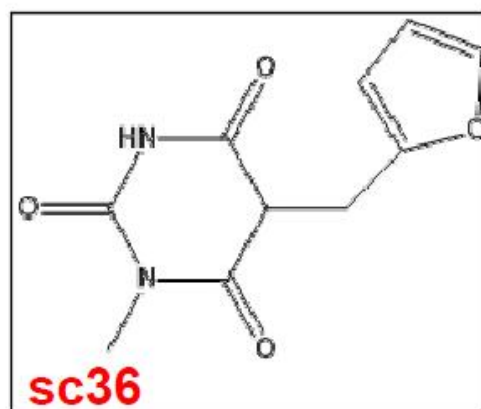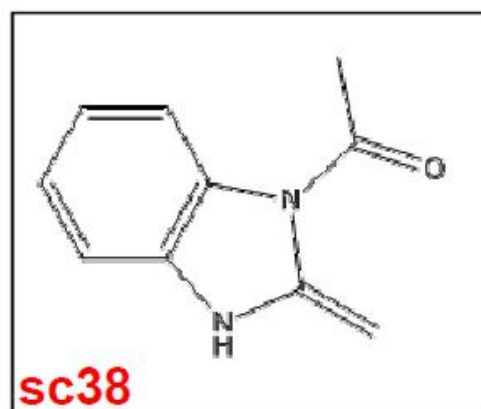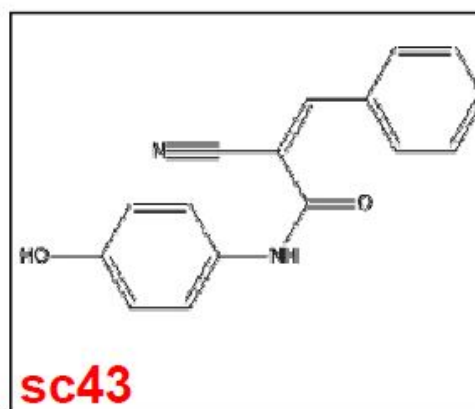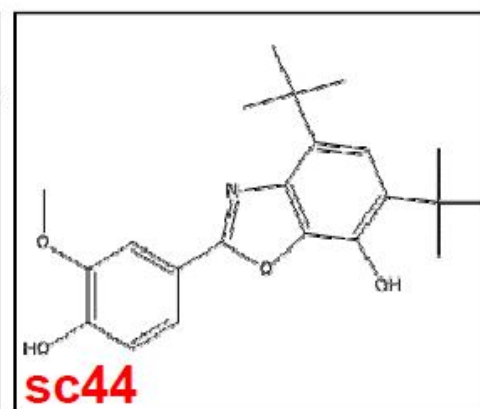

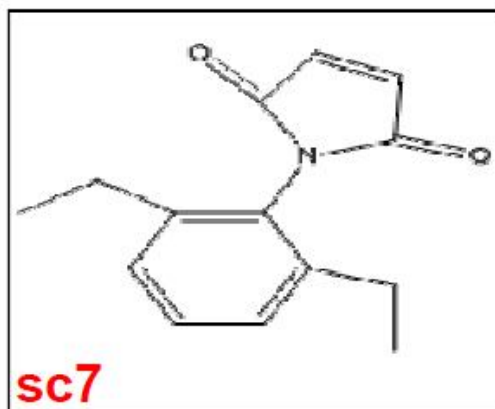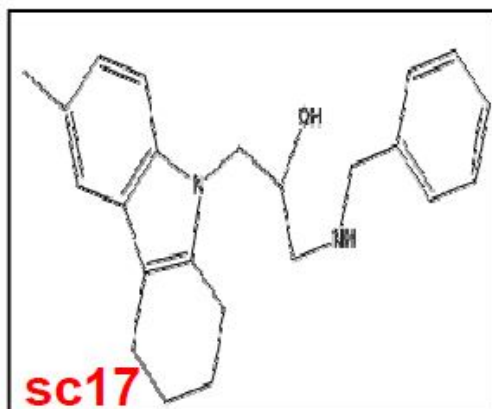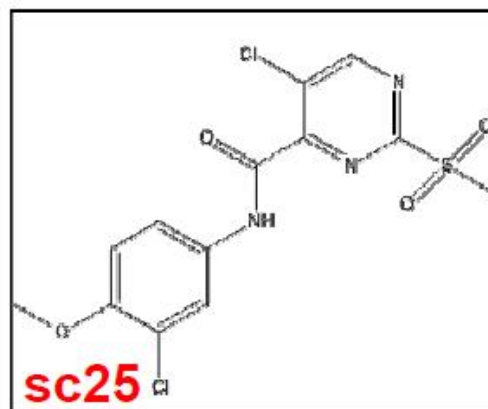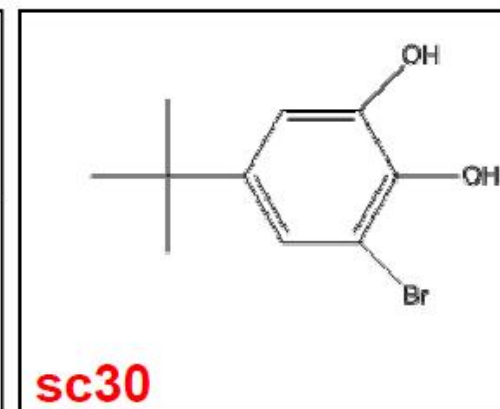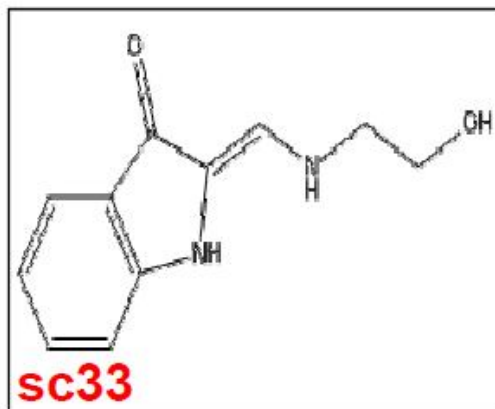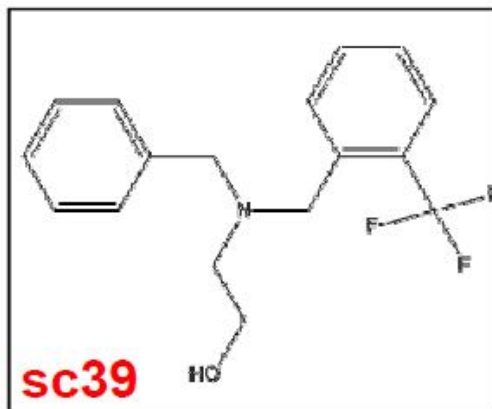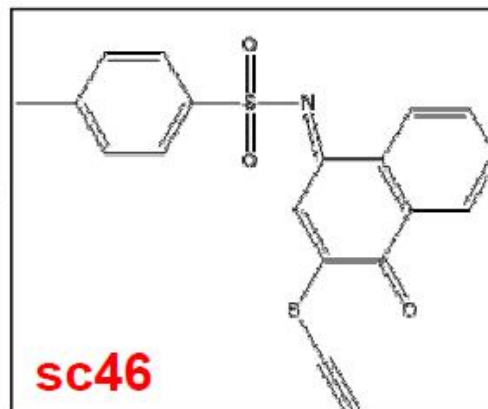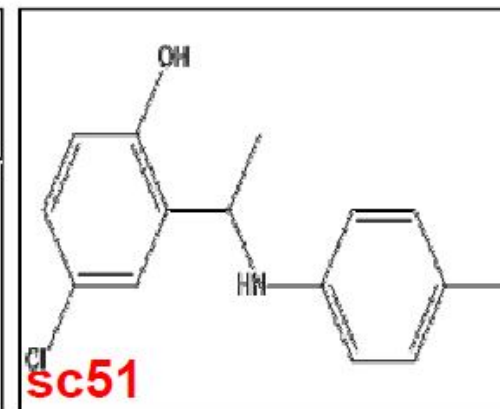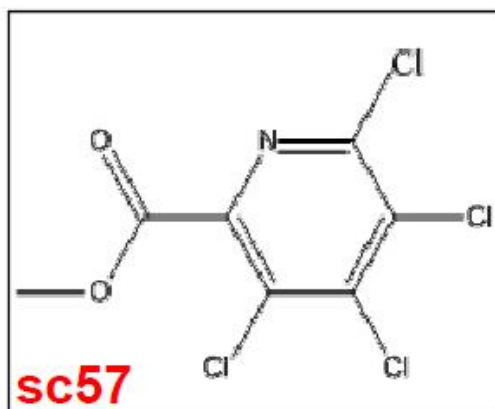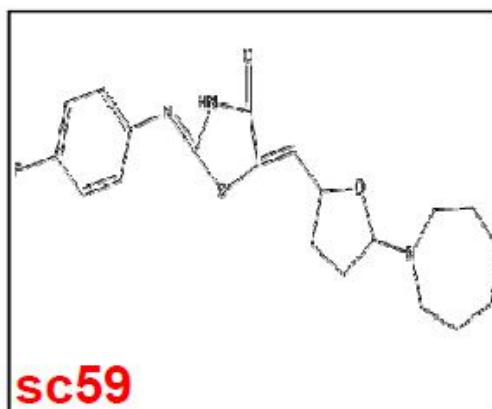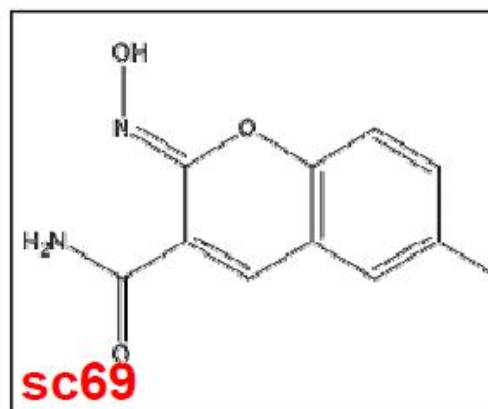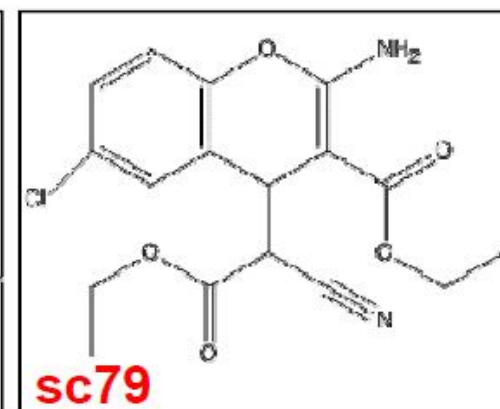



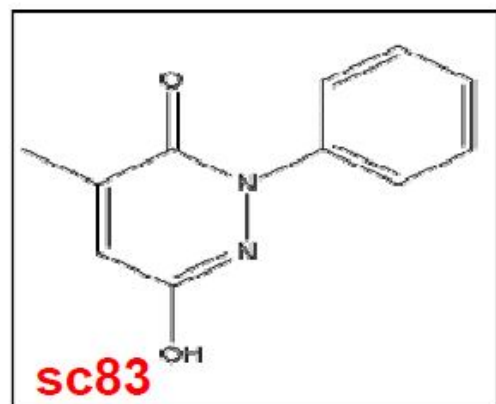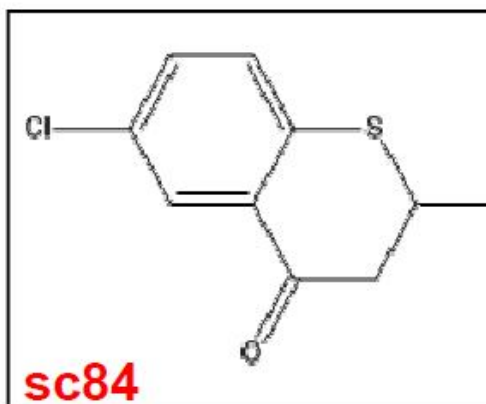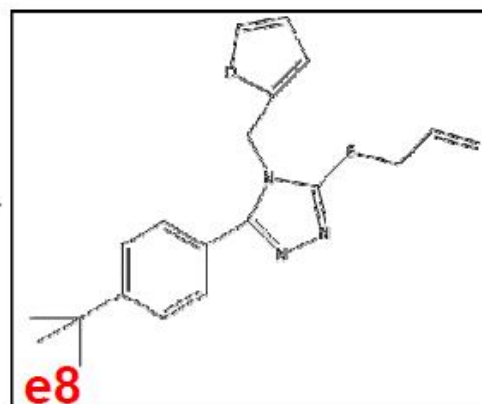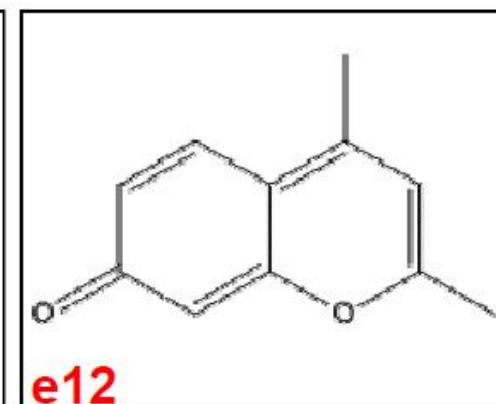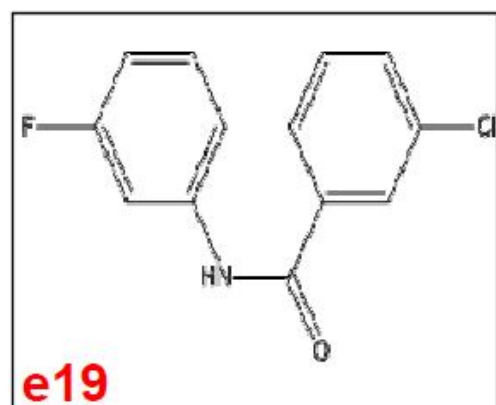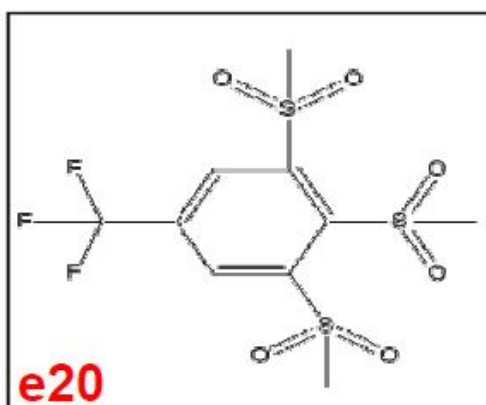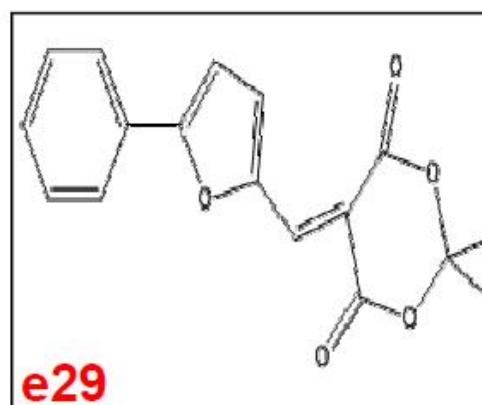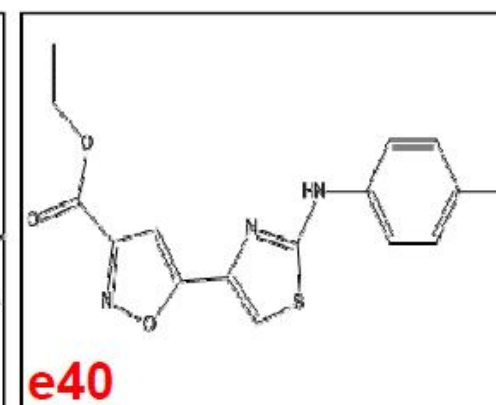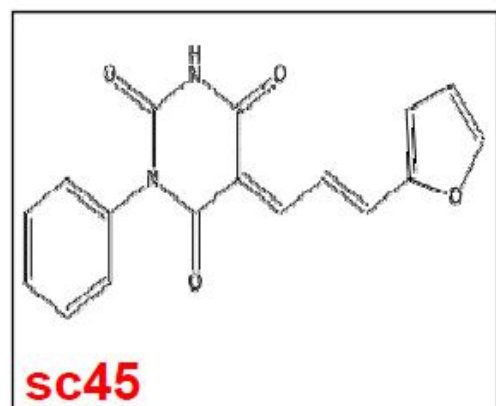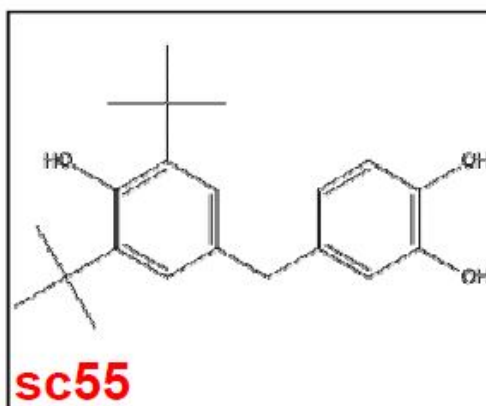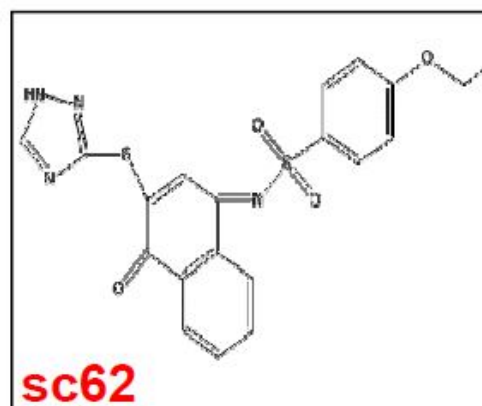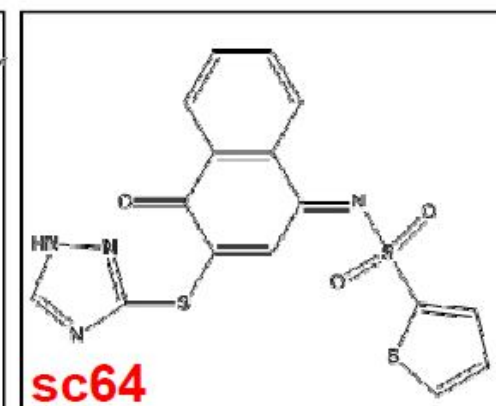

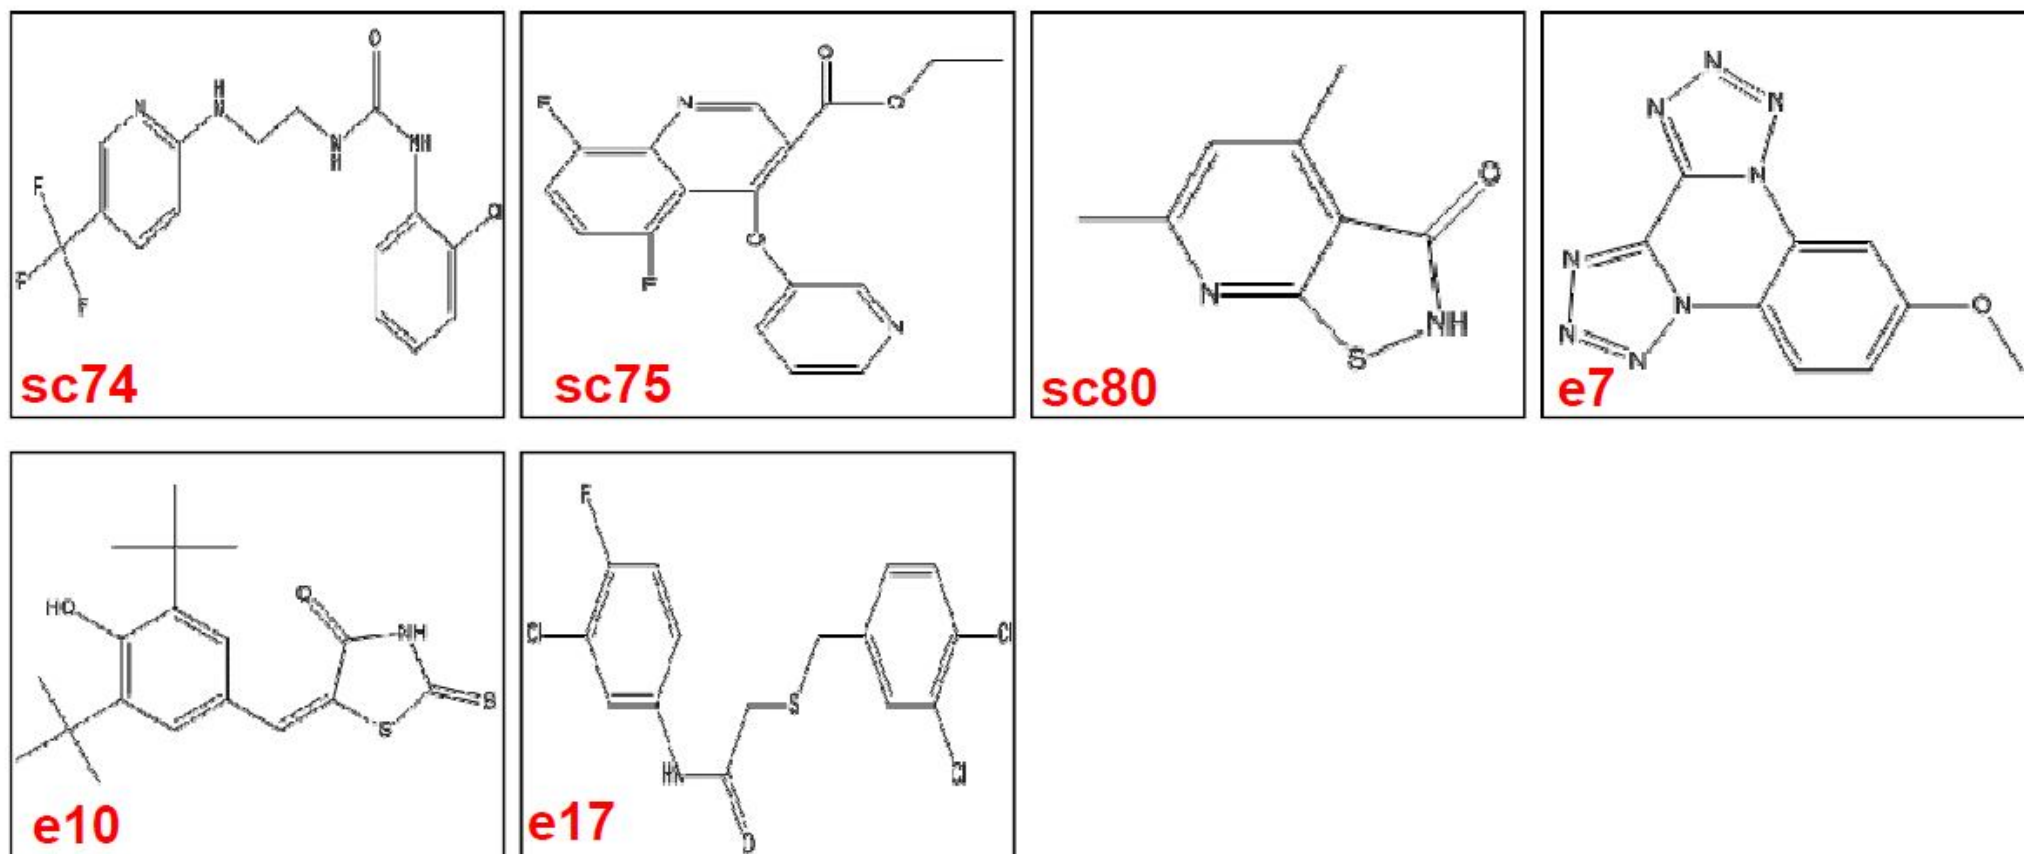

Figure S7. Chemical structure of confirmed positive hit compounds.

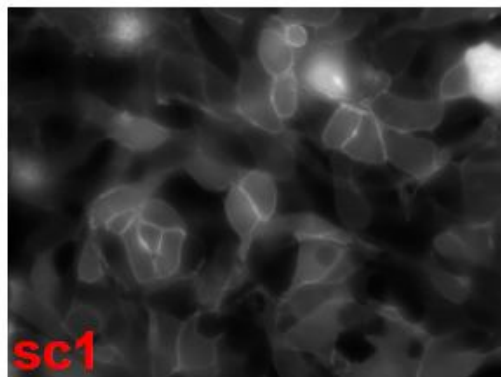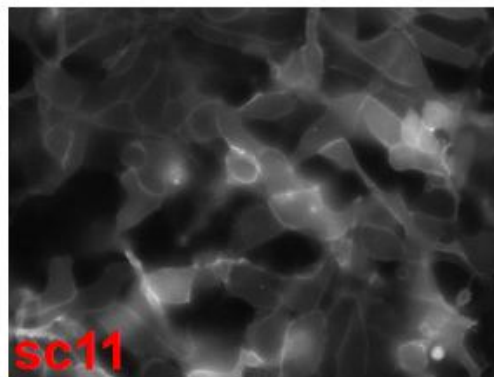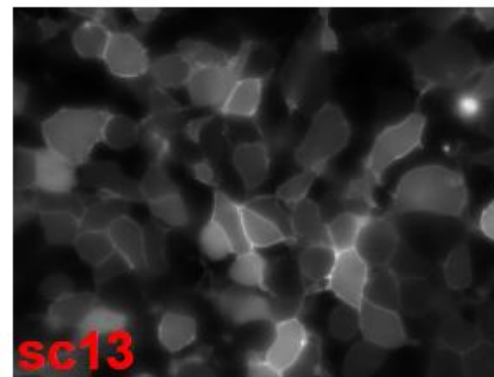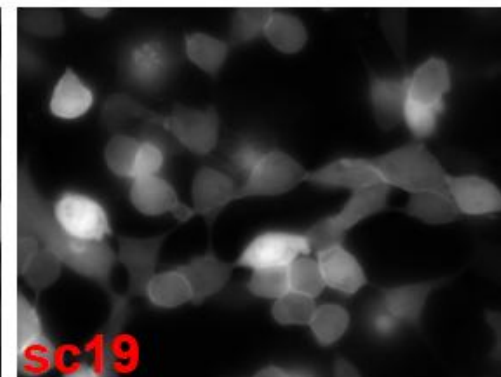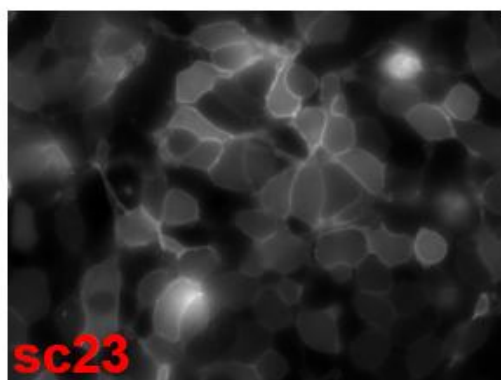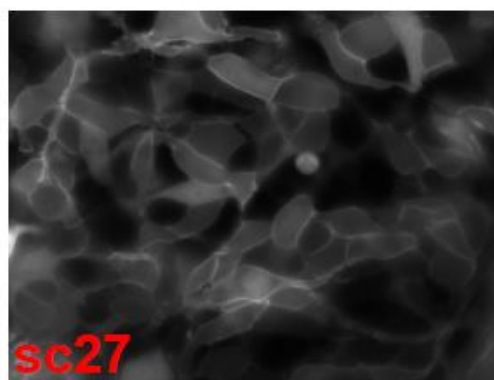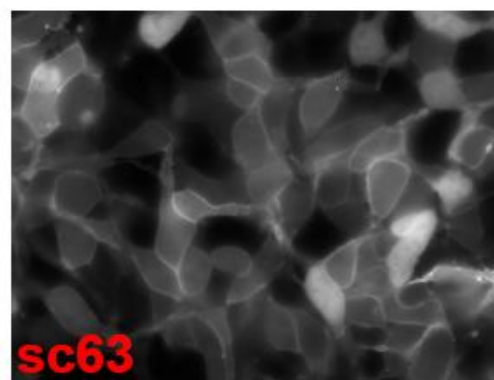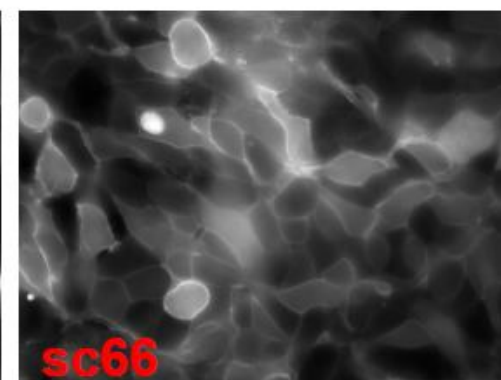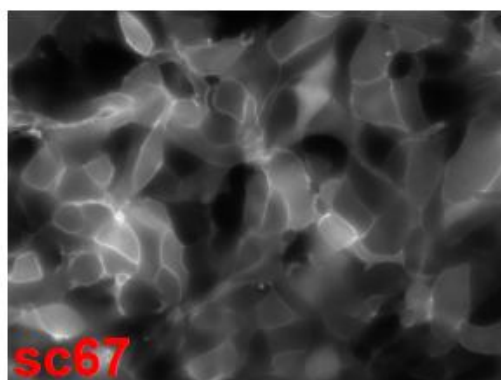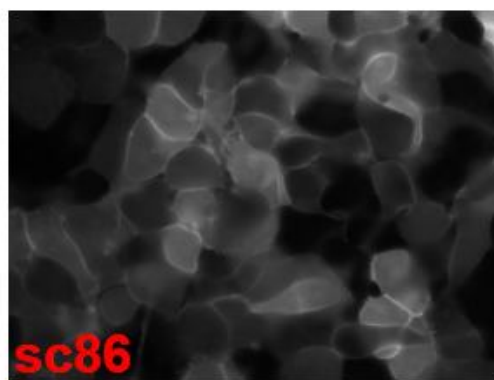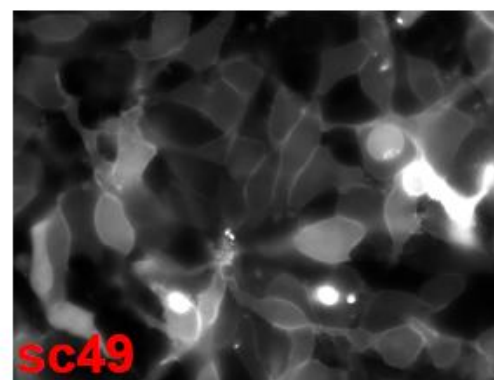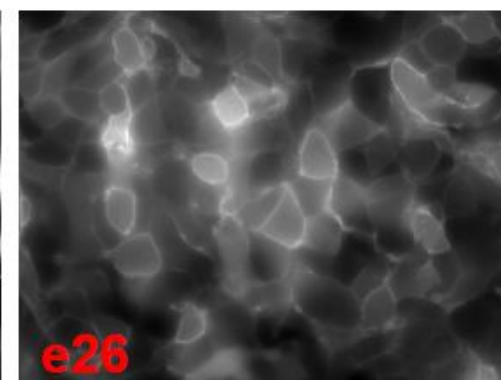

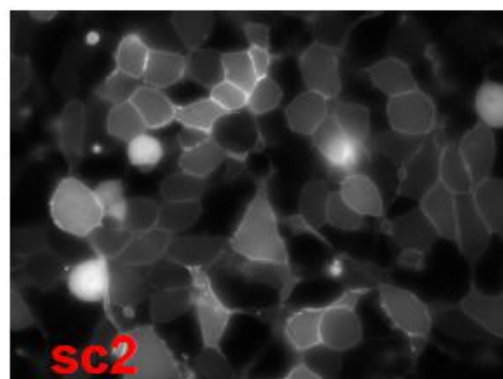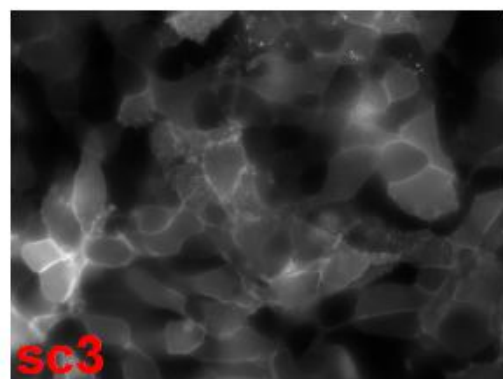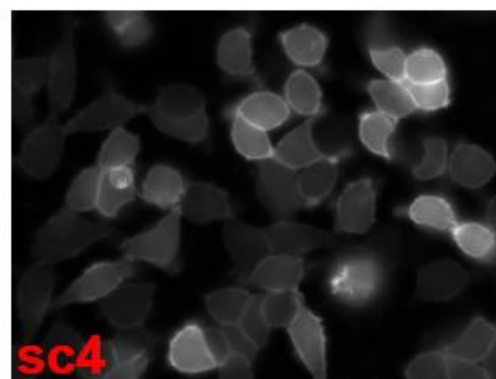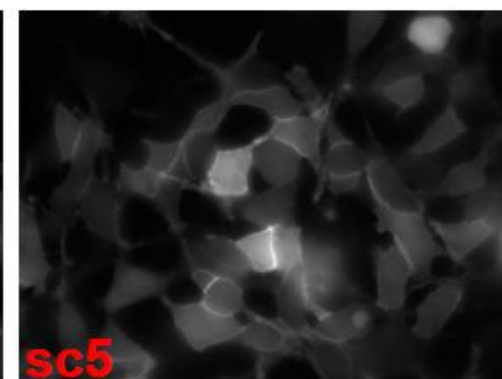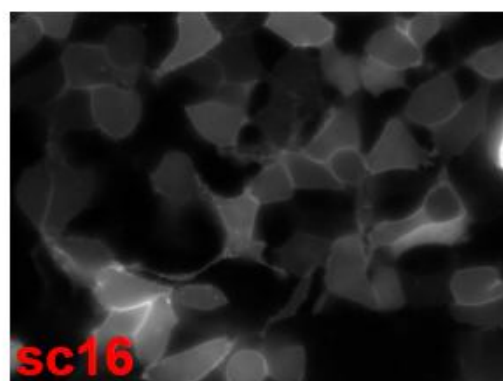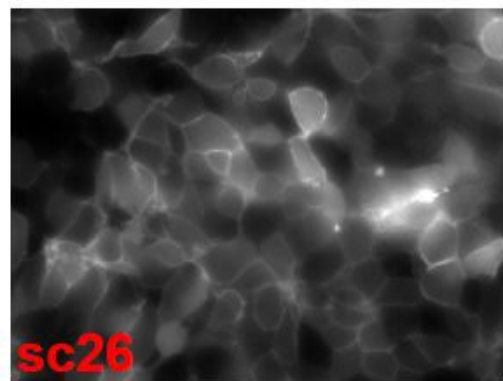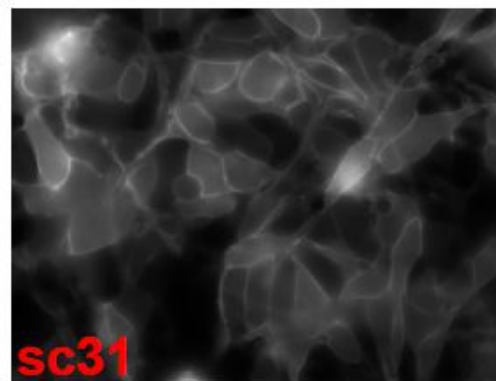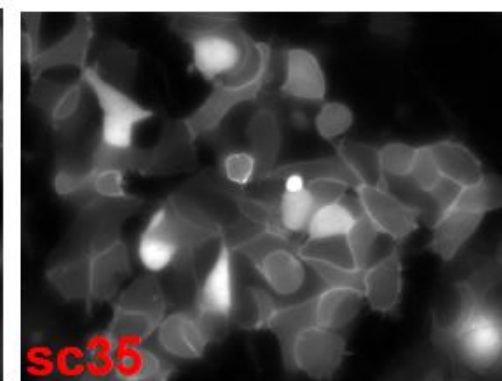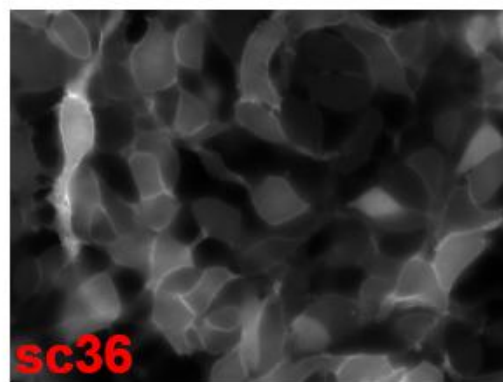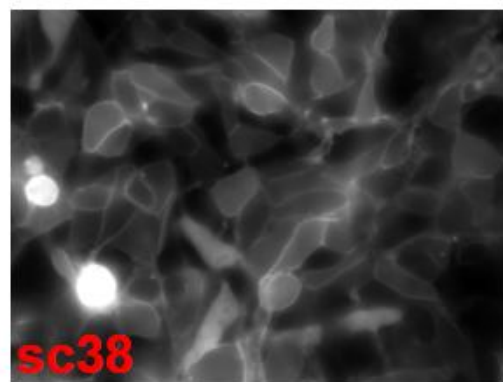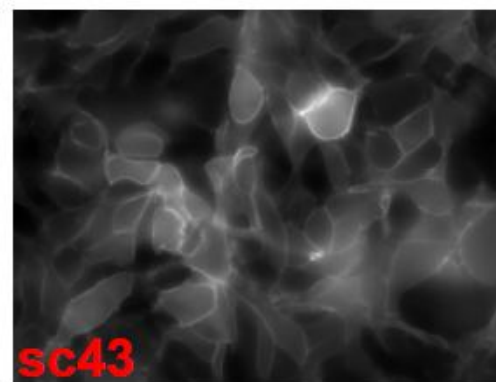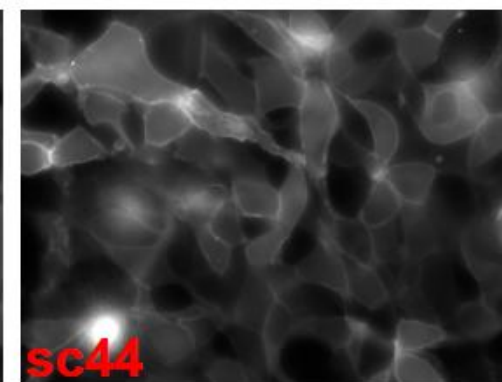



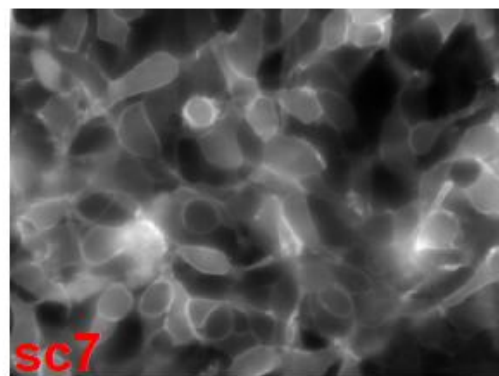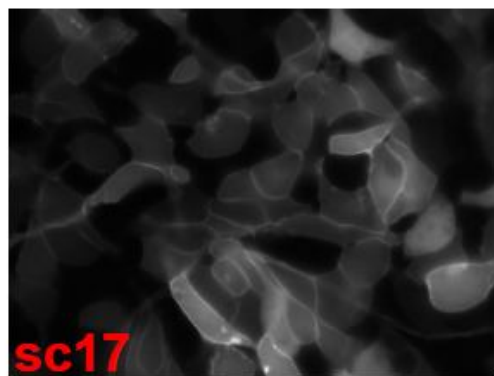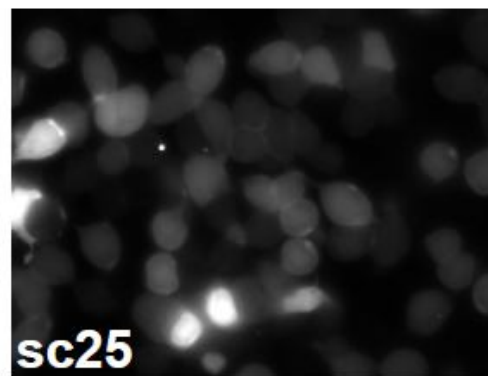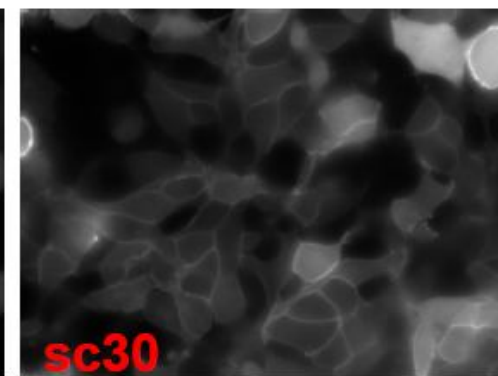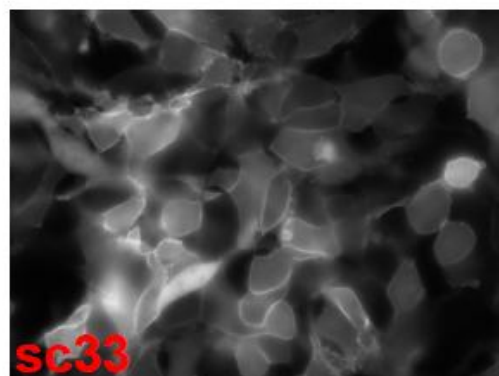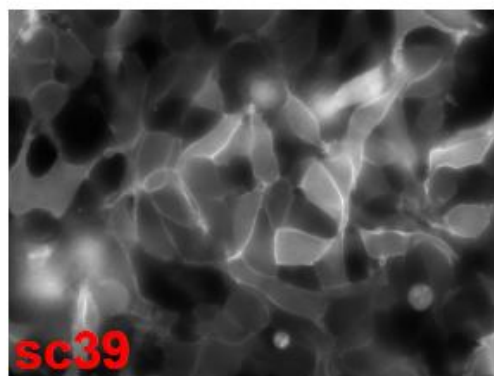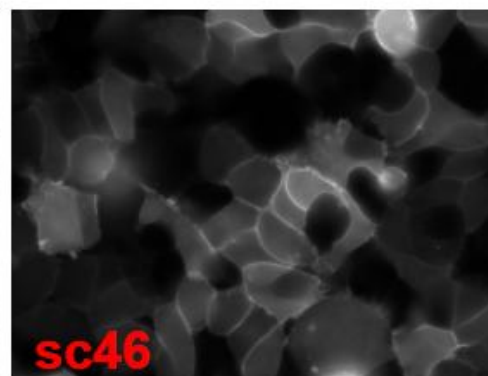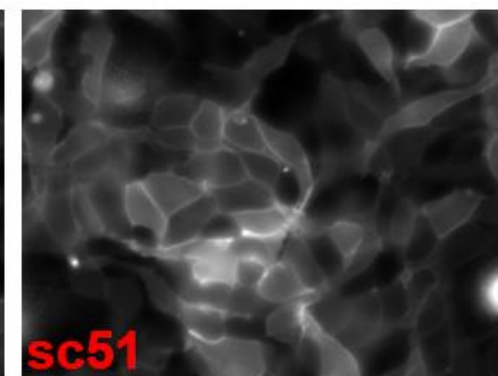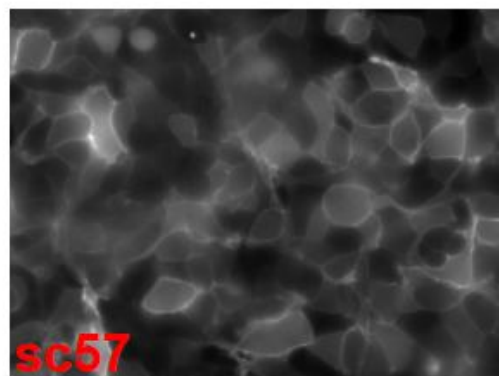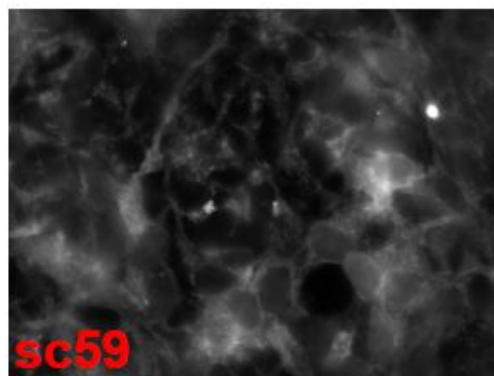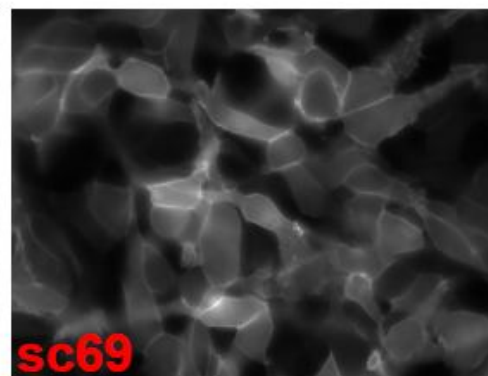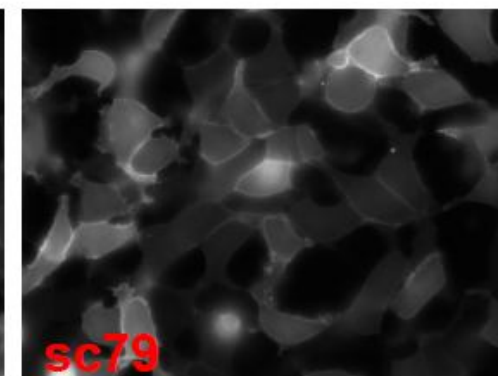

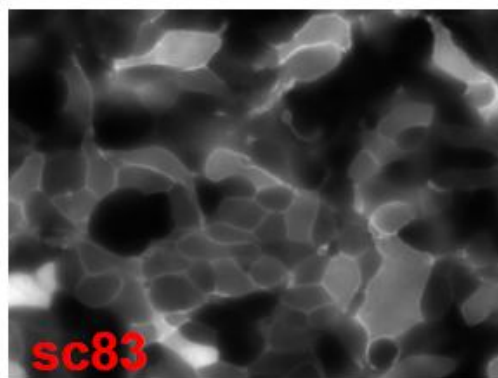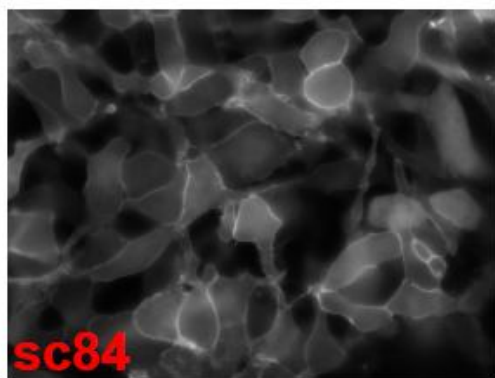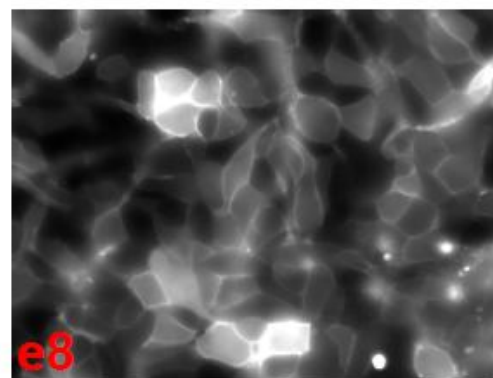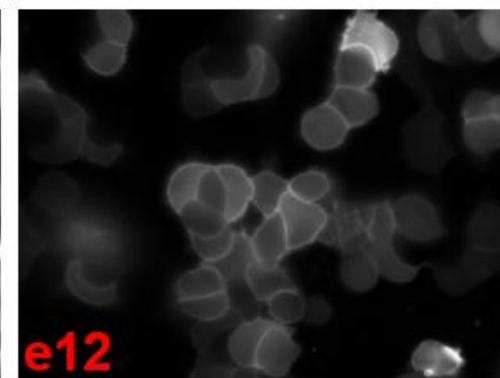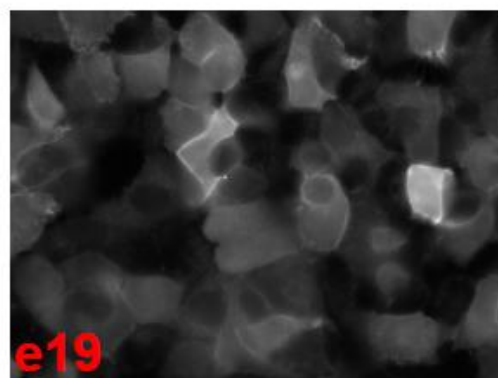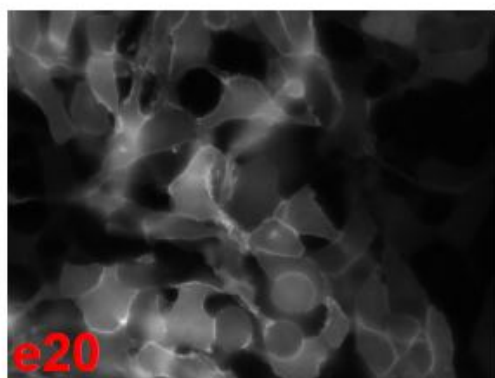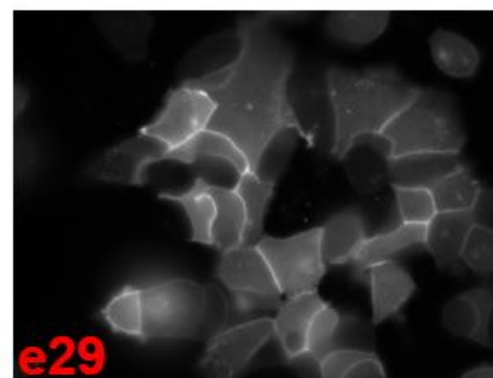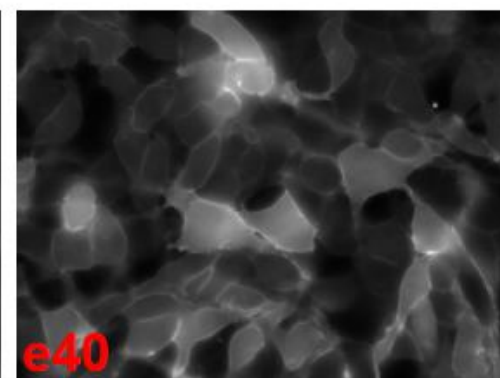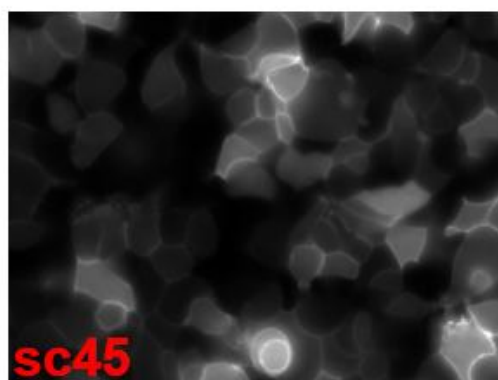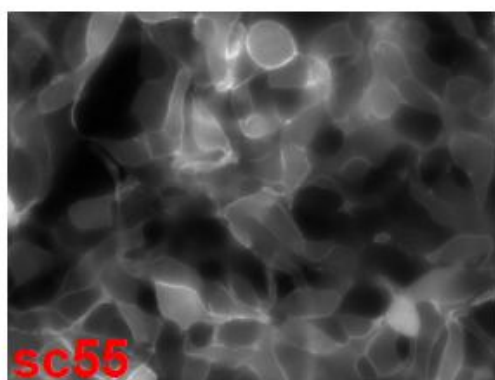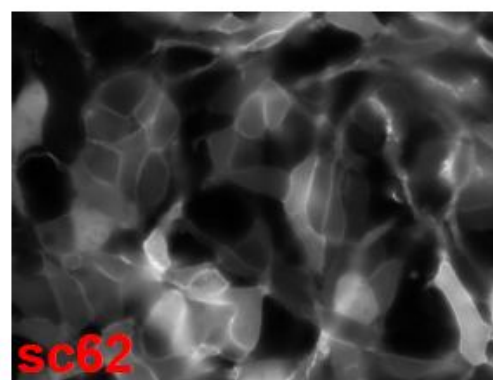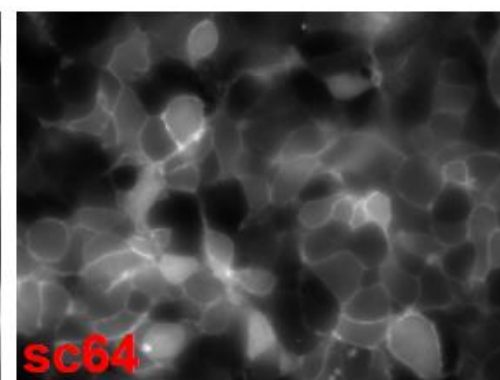

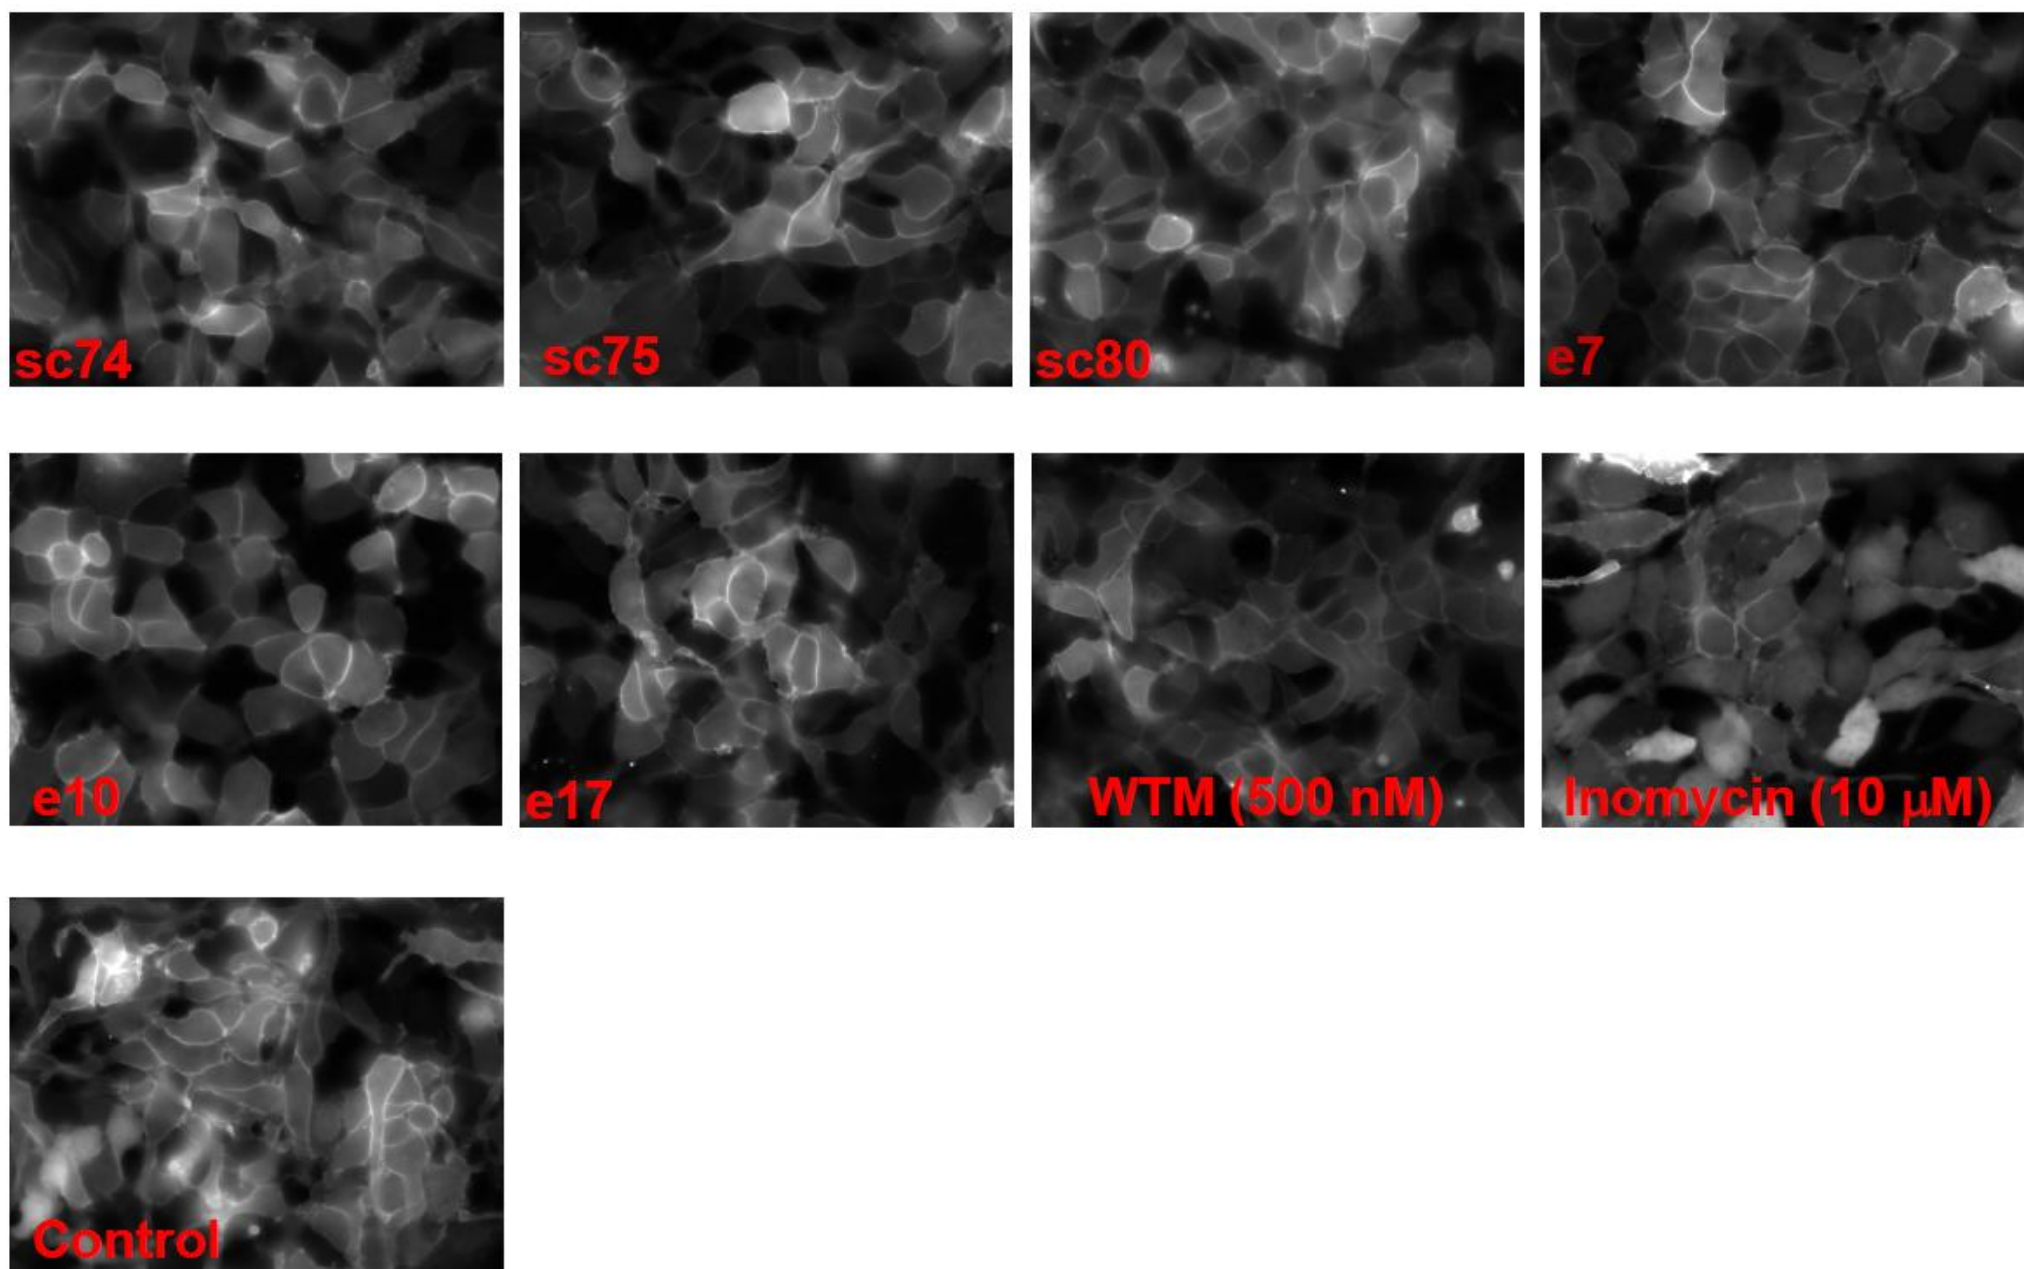

**Figure S8.** The effect of positive compounds on PtdIns(4,5)P<sub>2</sub>-mediated membrane localization of EGFP-PLC-delta1-PH. HEK293 cells stably expressing EGFP-PLC-delta-PH were treated with each compound (8  $\mu$ g/ml) for 30 minutes before imaging.



HeLa-30min

Figure S9-Page 1

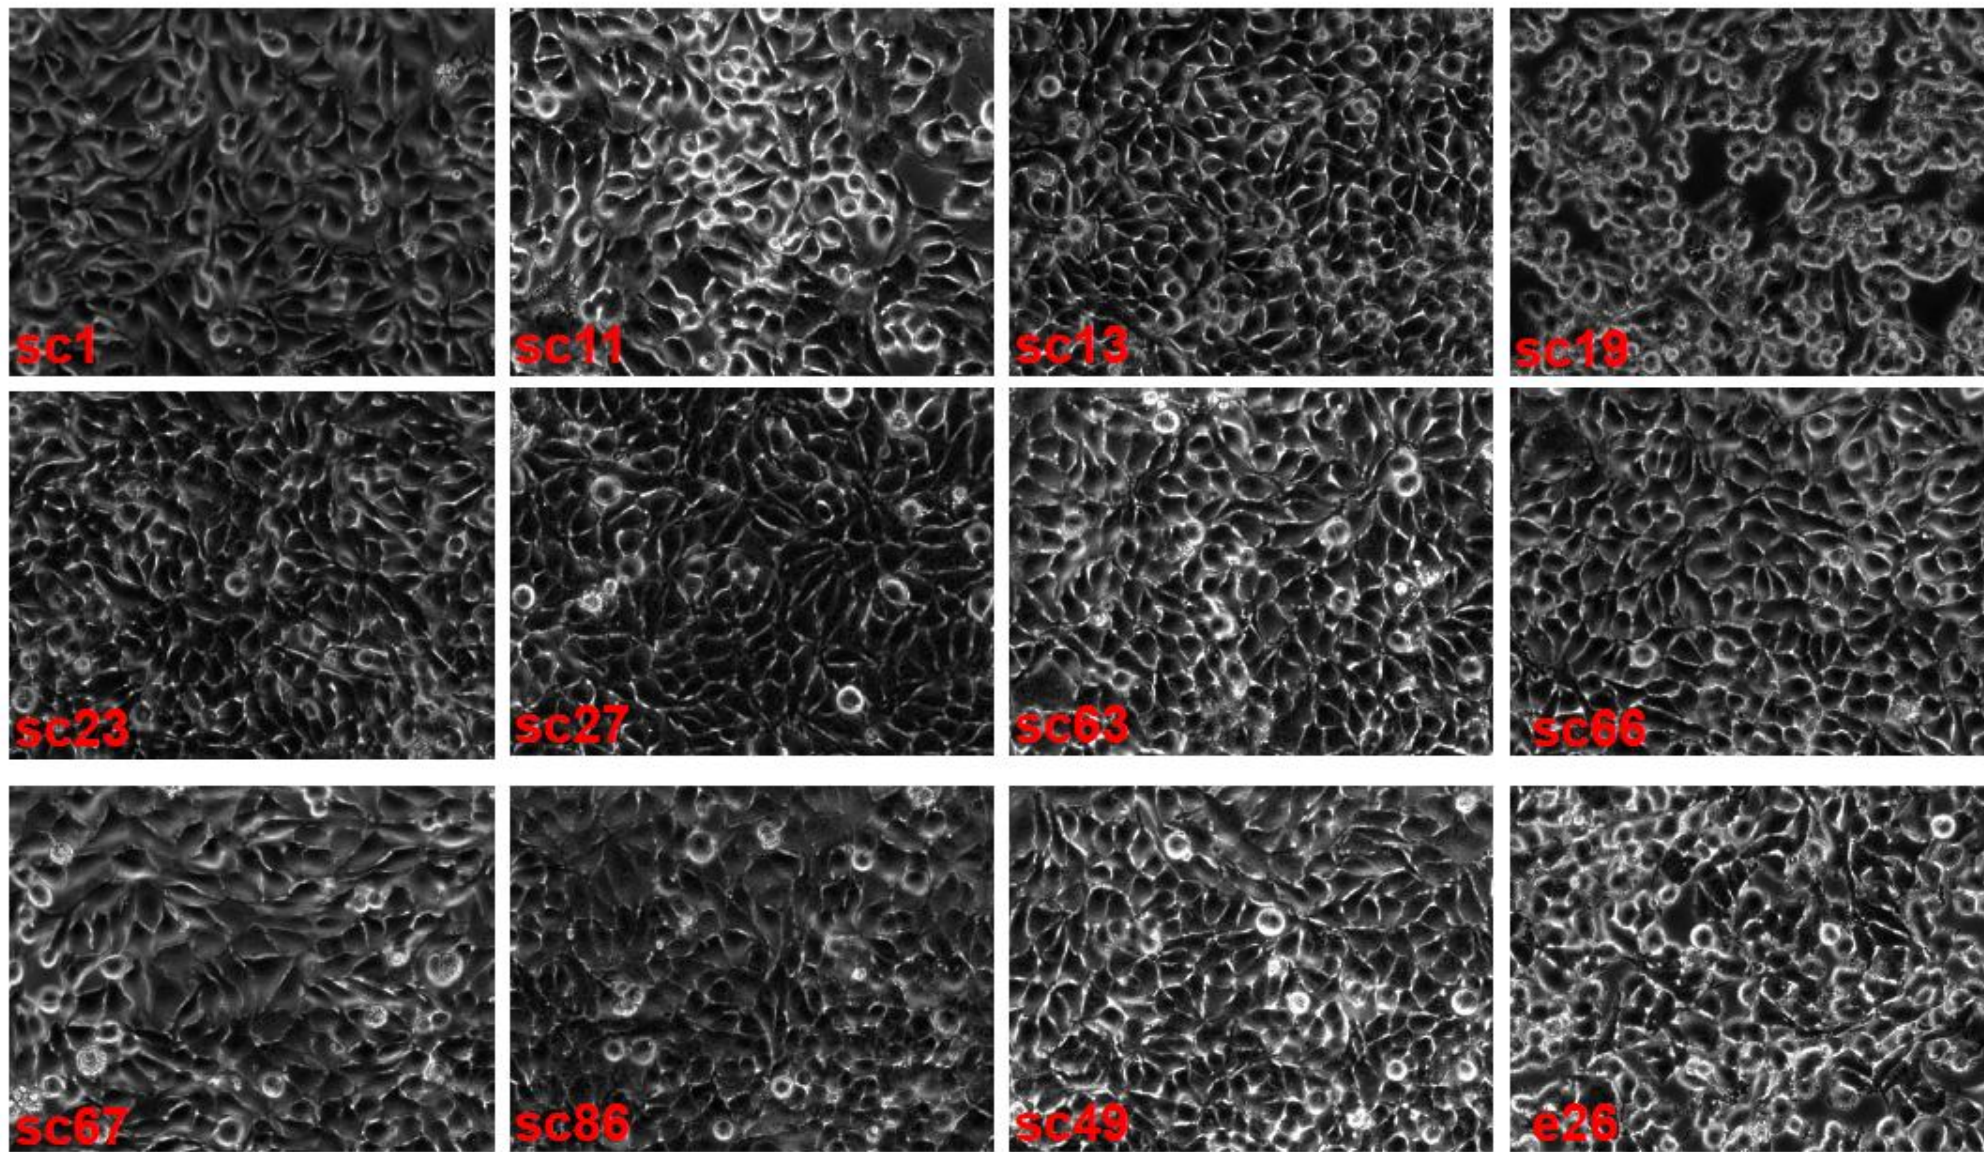



HeLa-30min

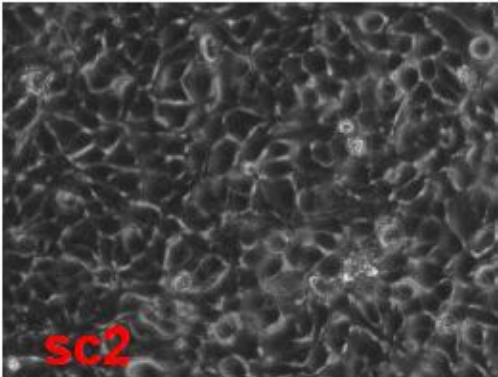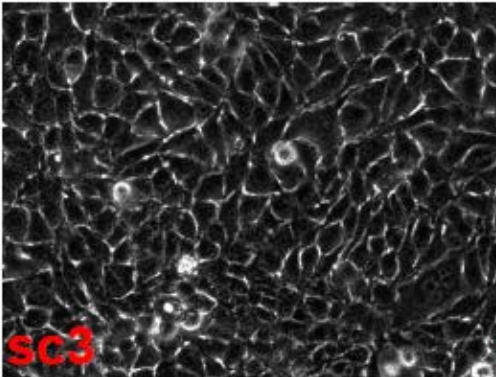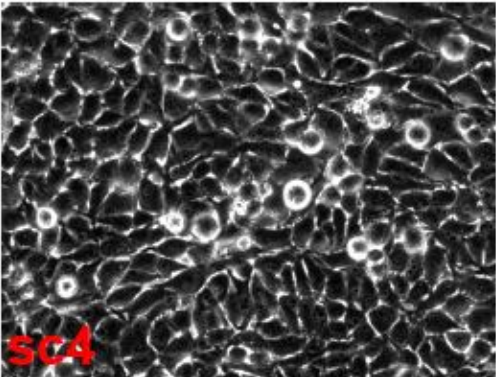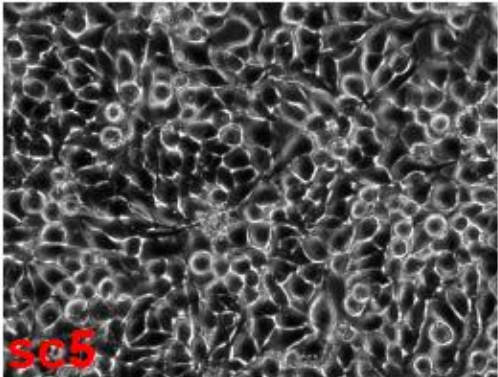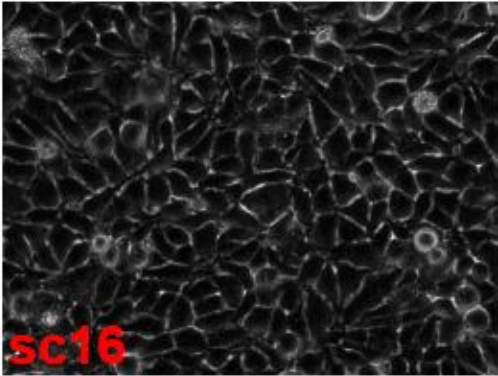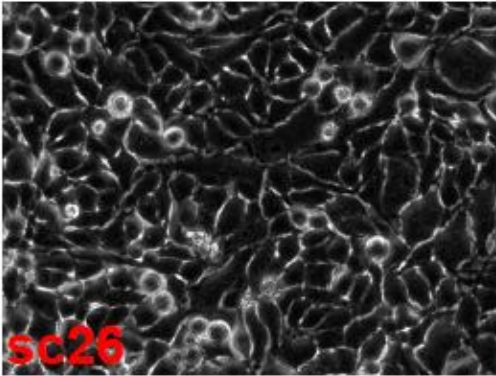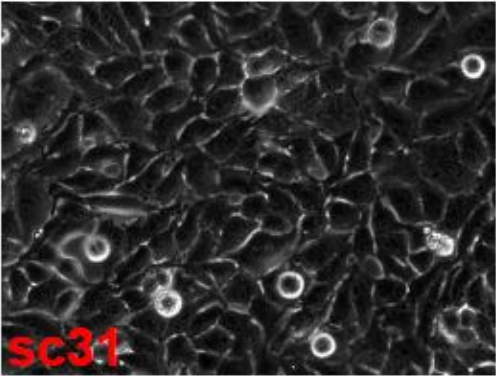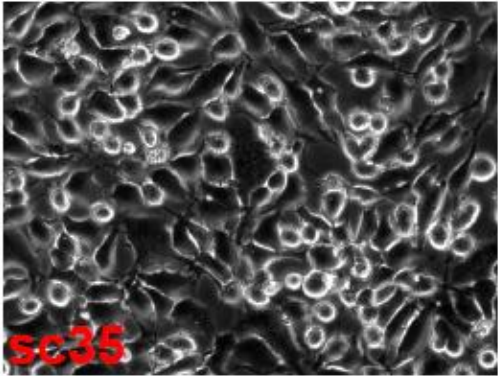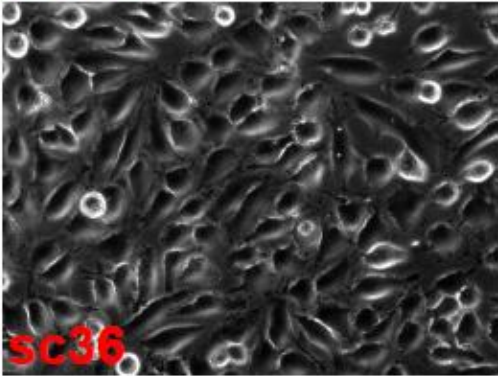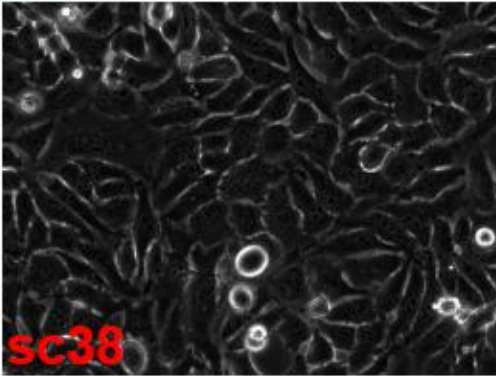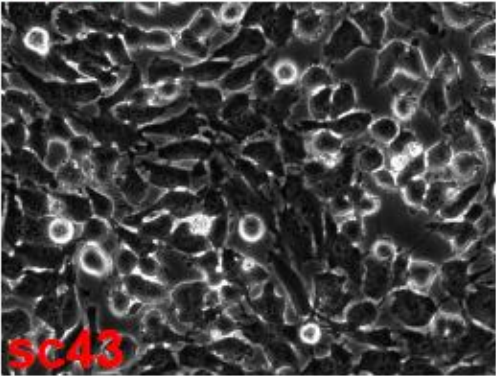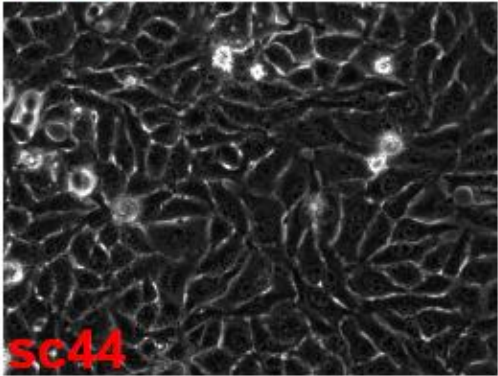



HeLa-30min

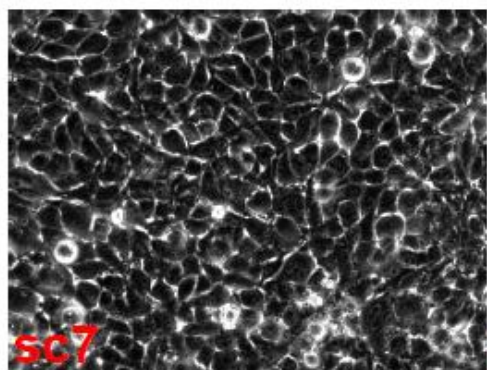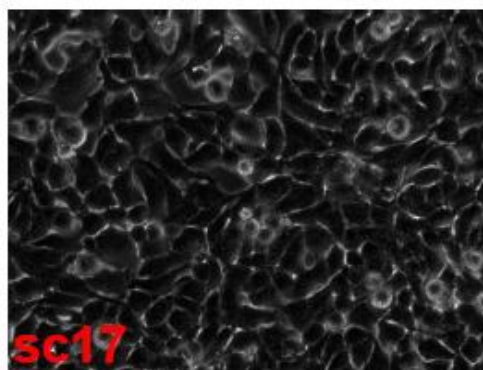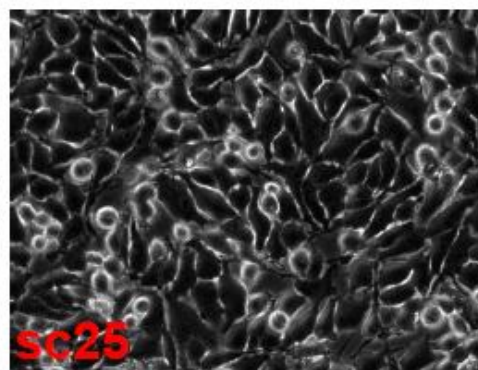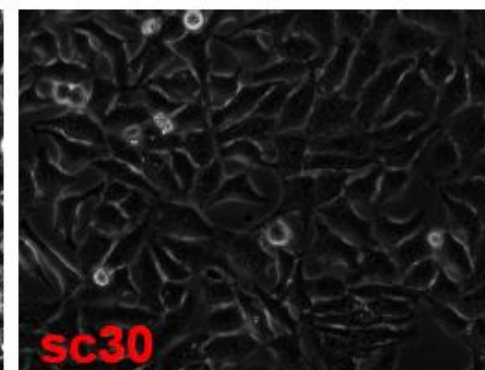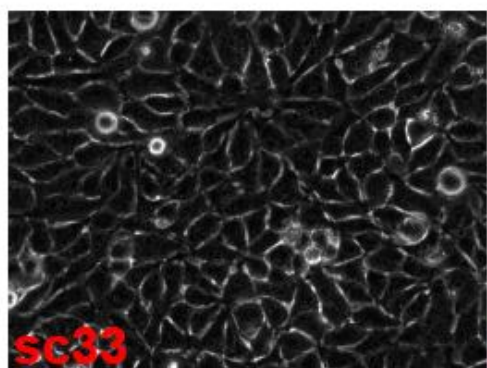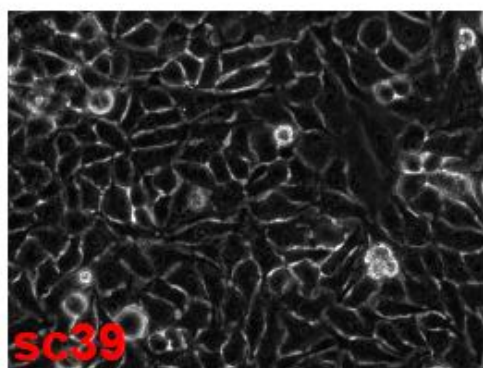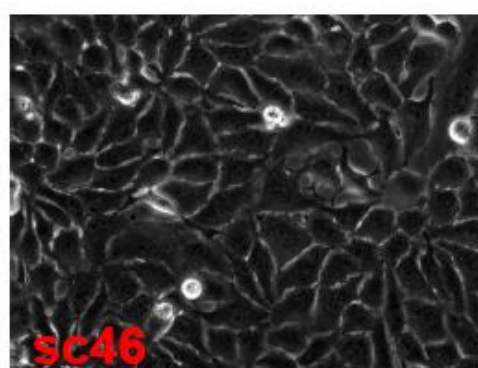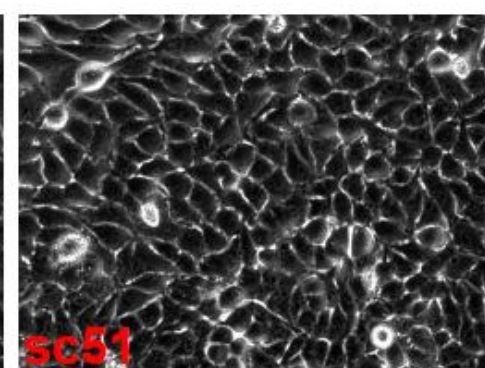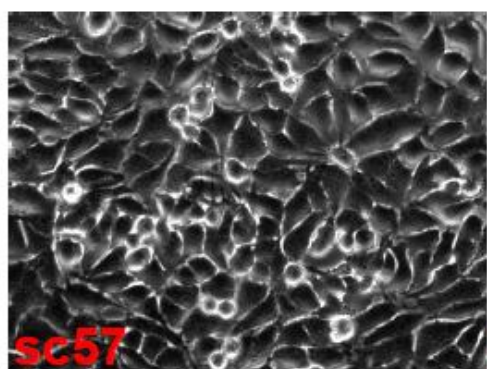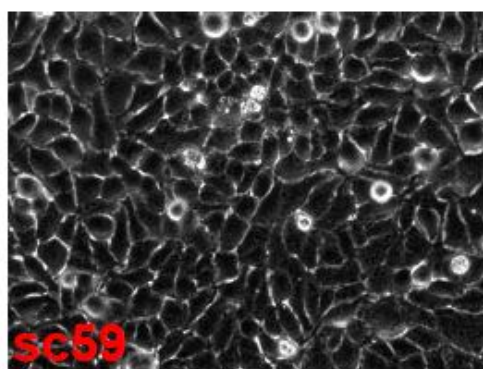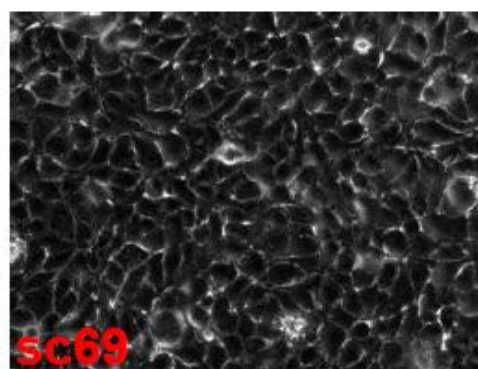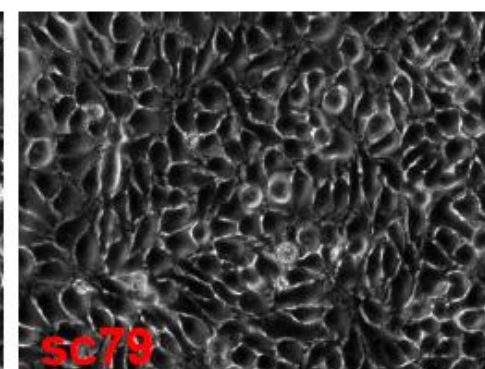



HeLa- 30min

Figure S9-Page 4

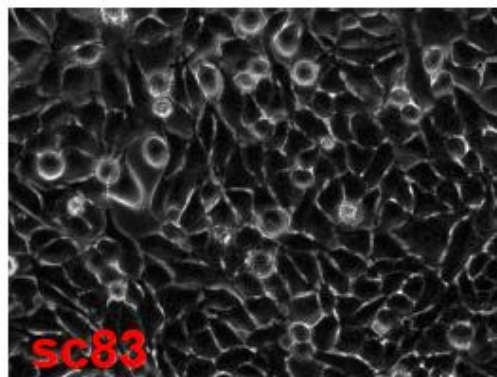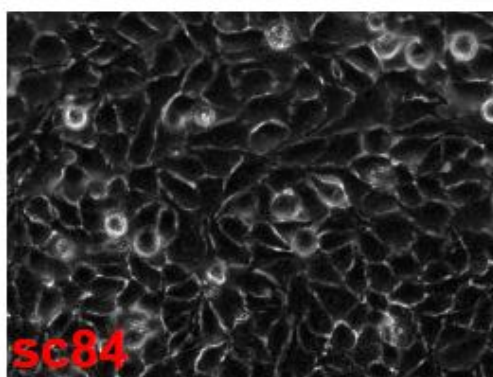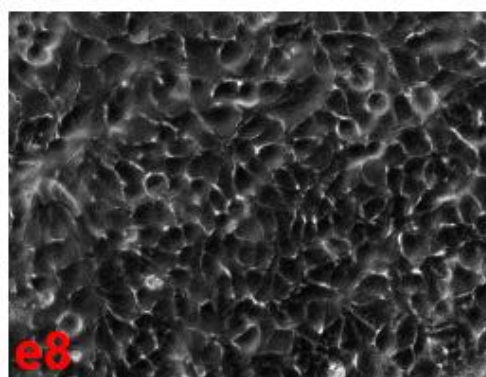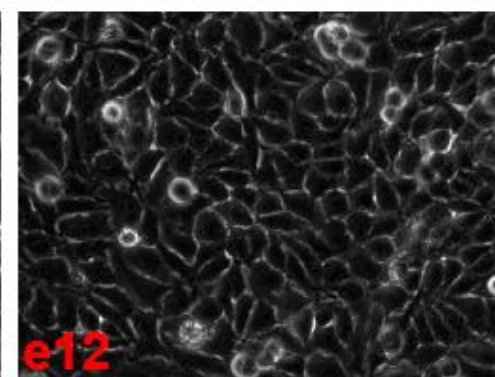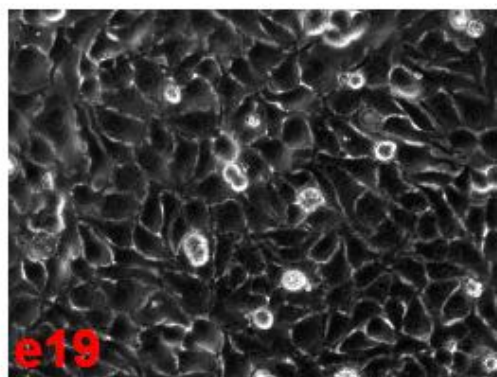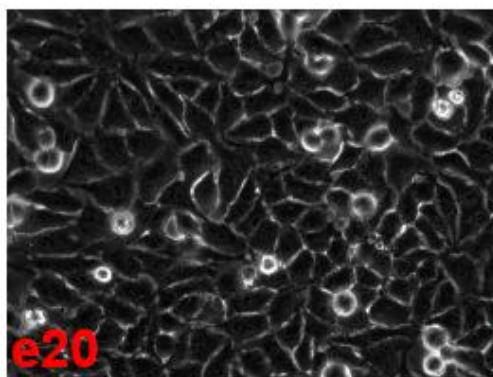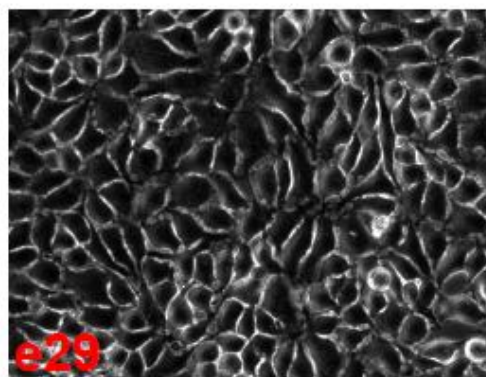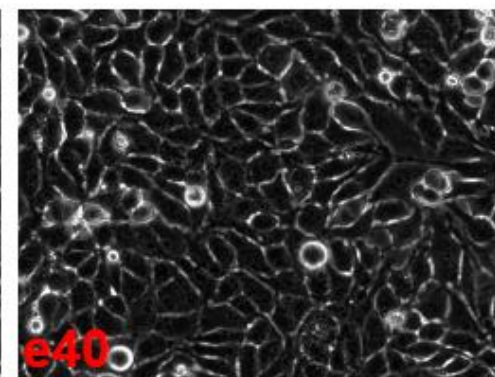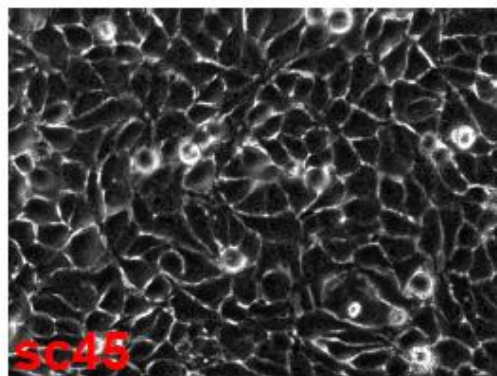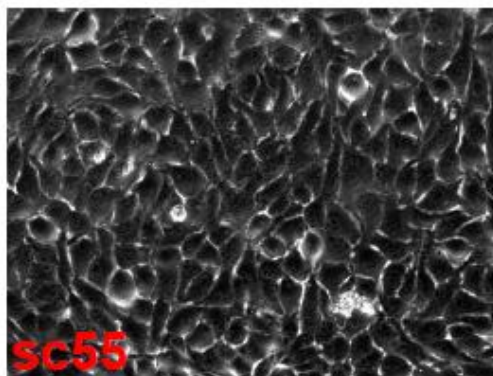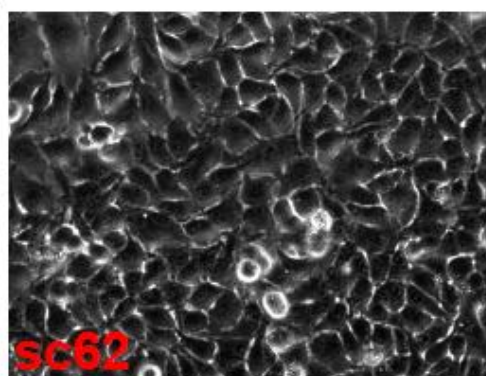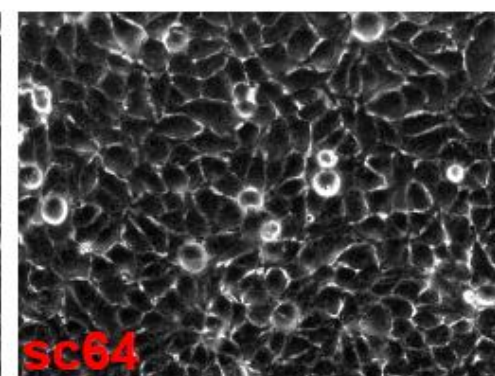



# HeLa- 30min

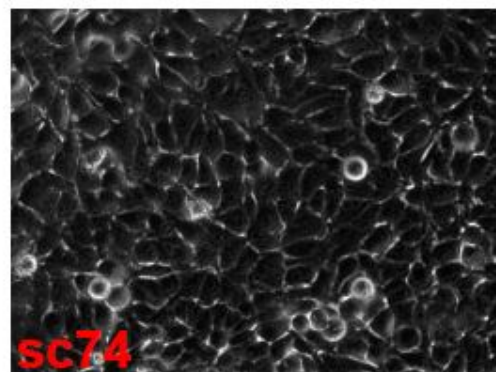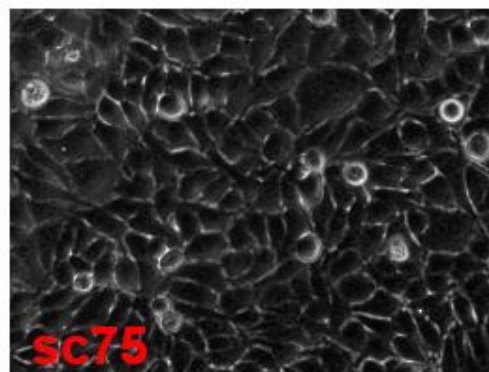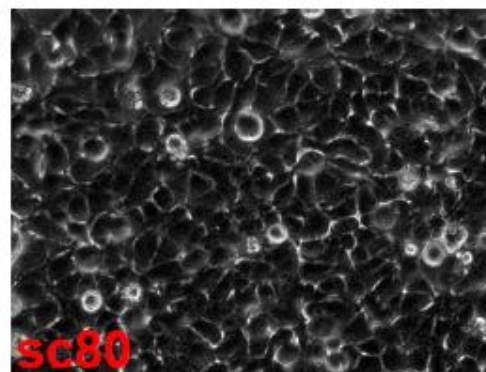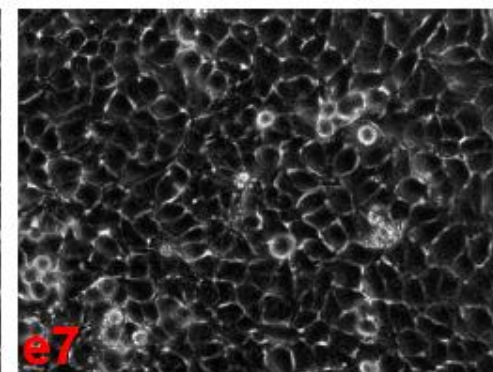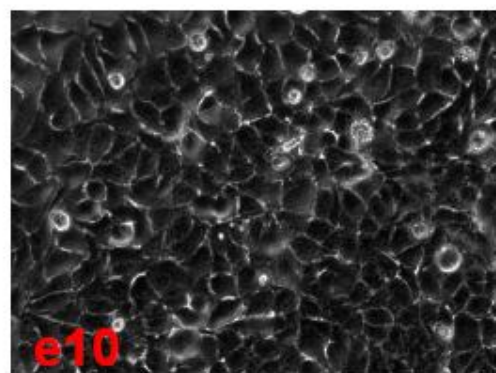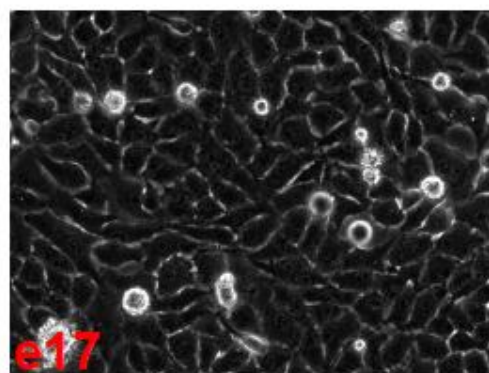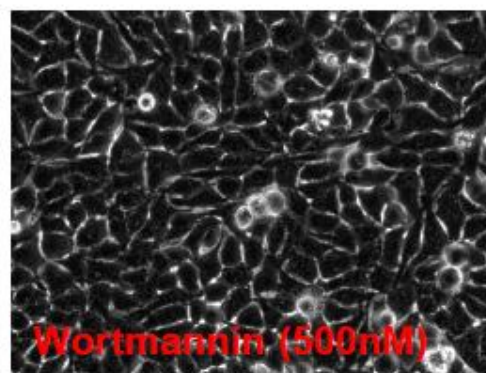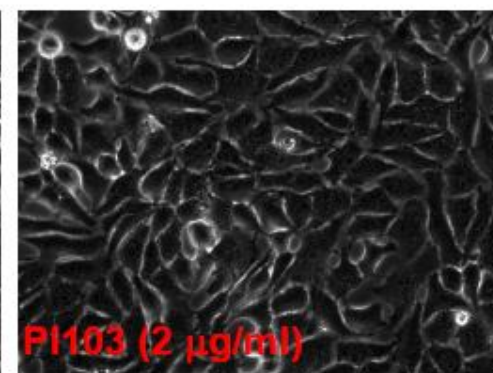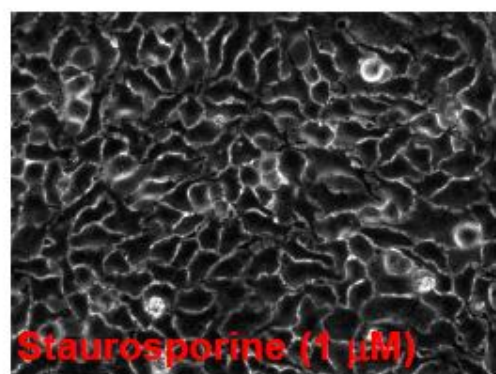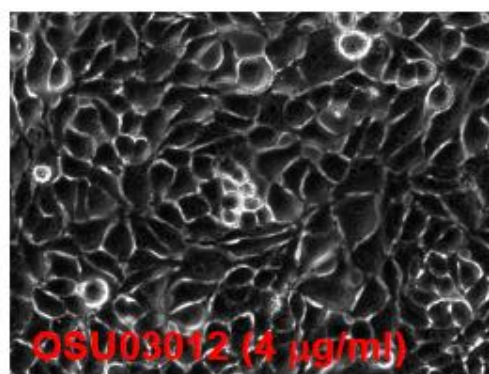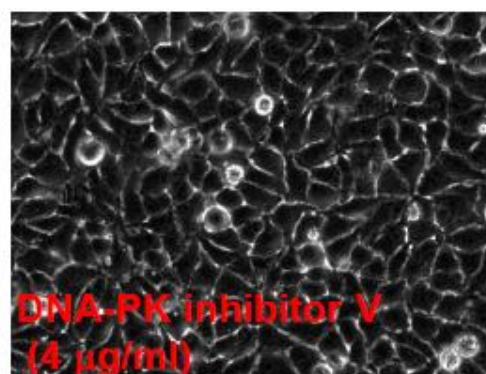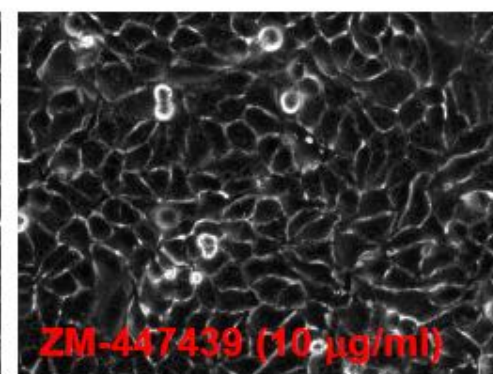



HeLa-6 hr

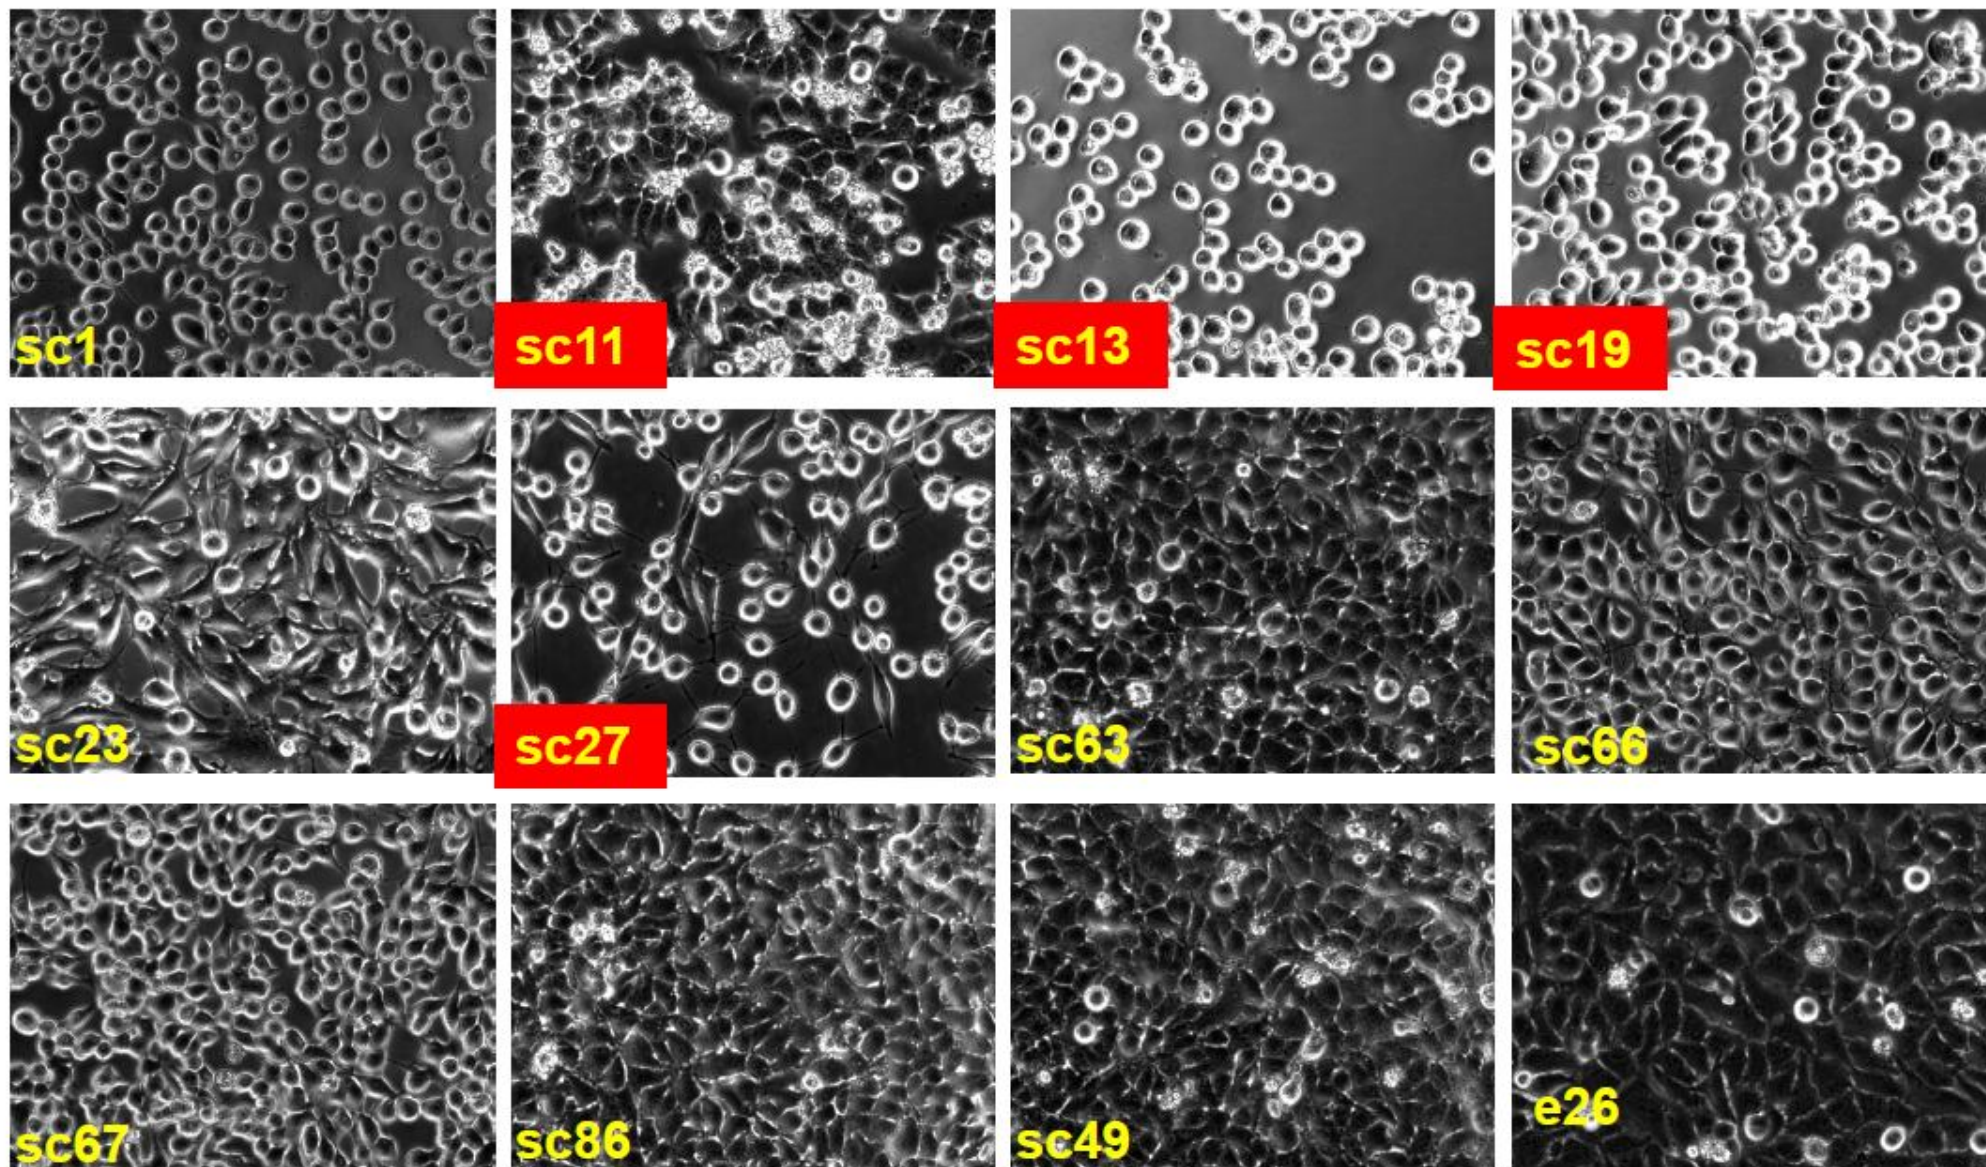



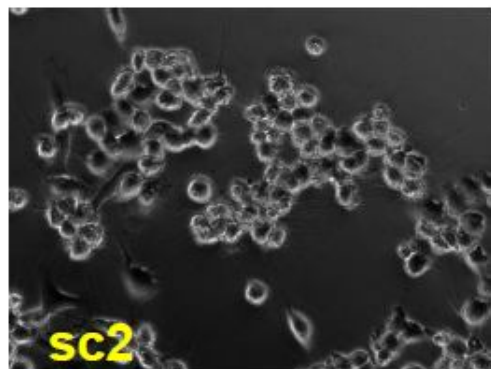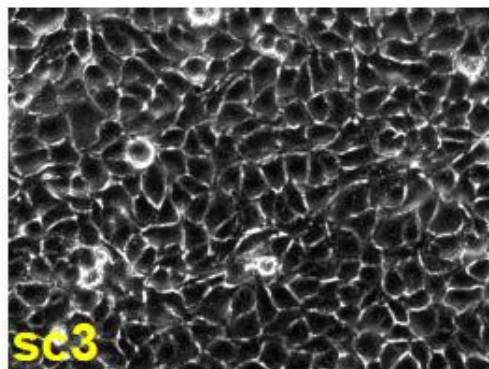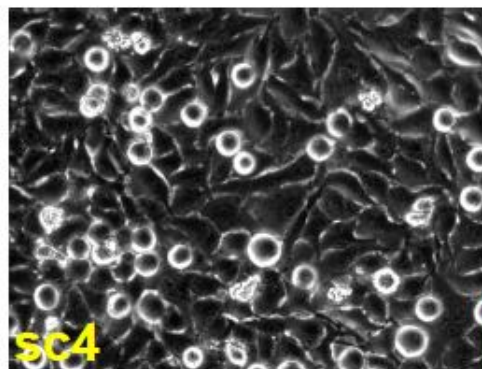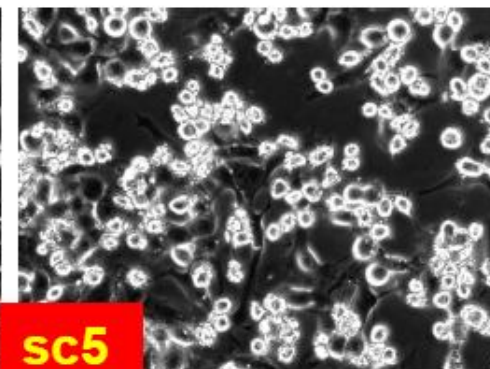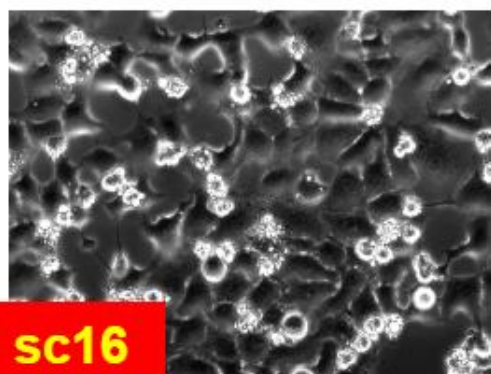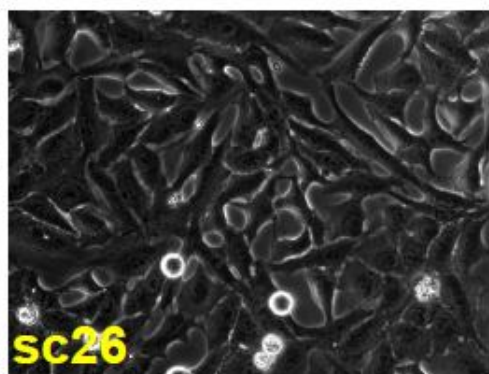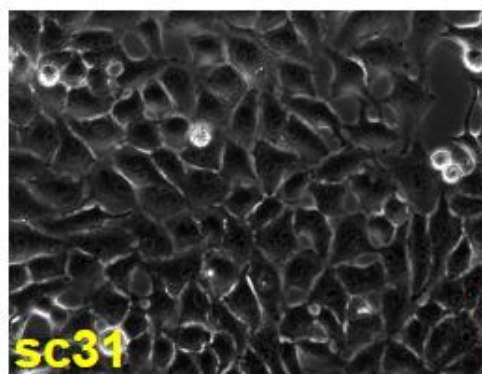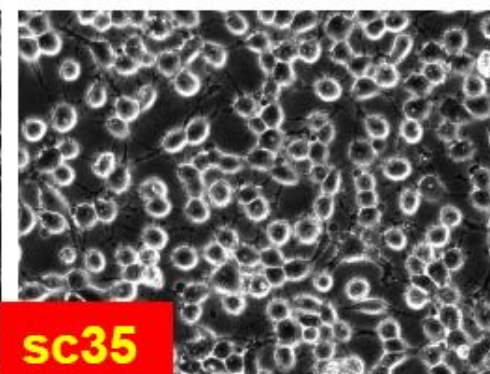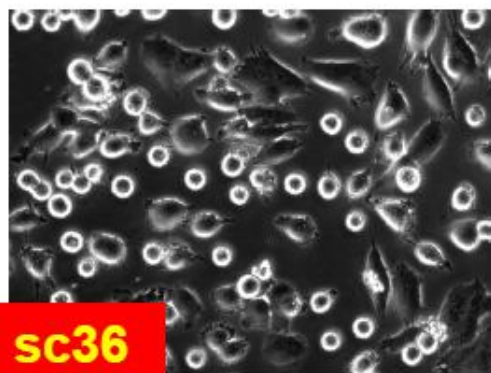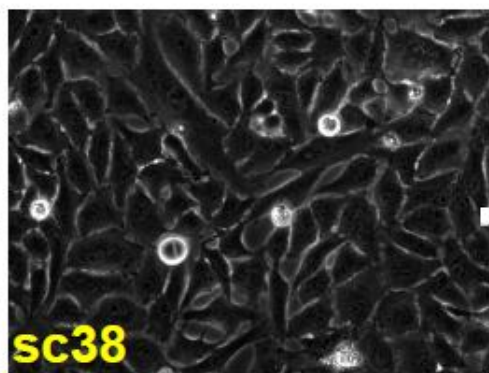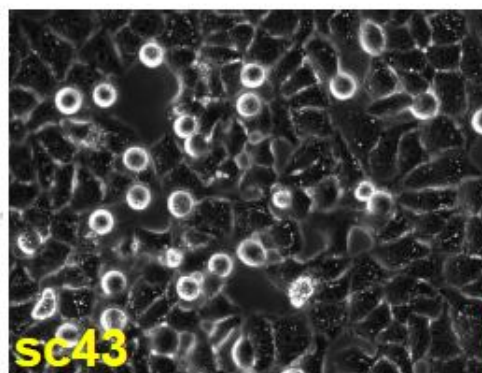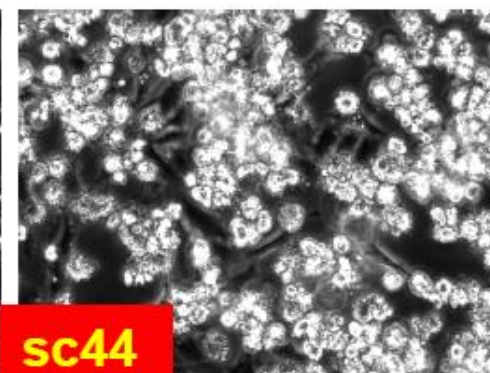



HeLa- 6 hr

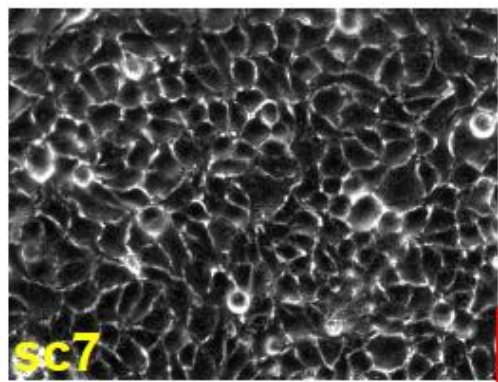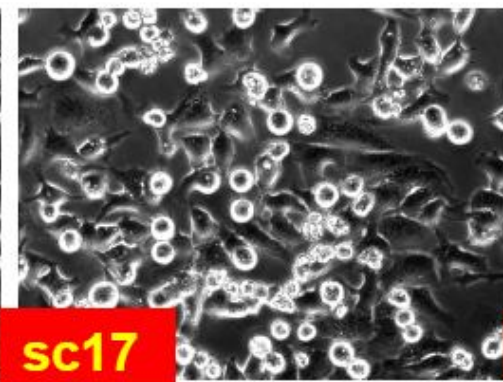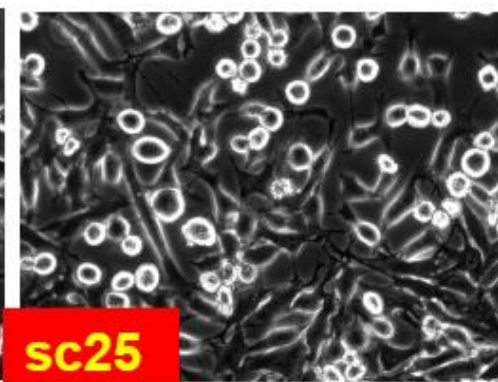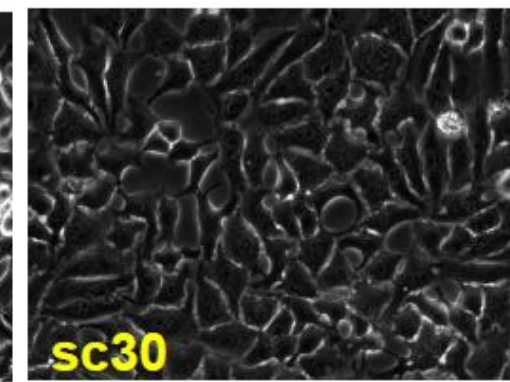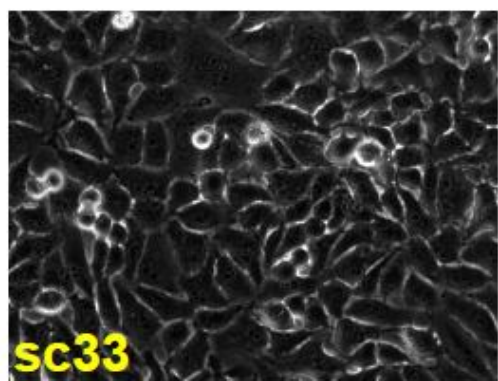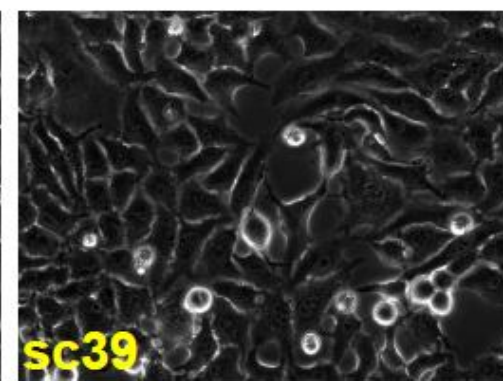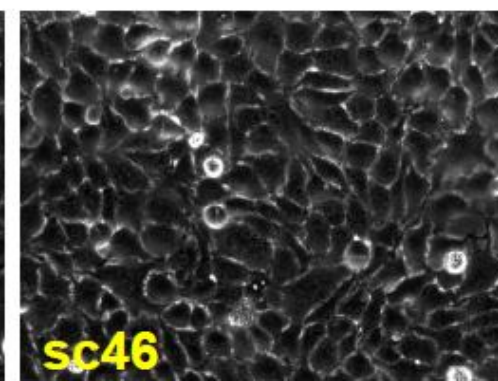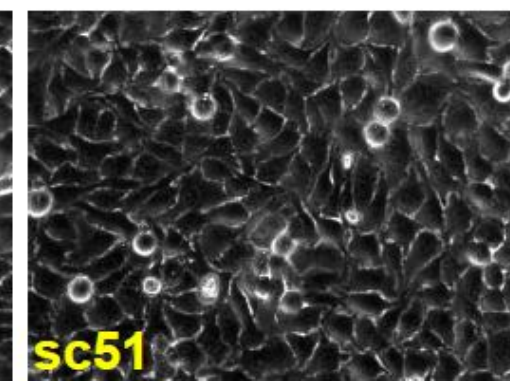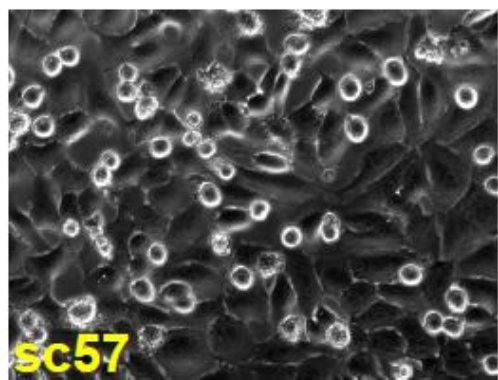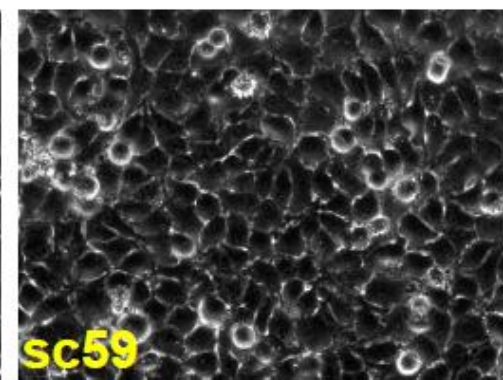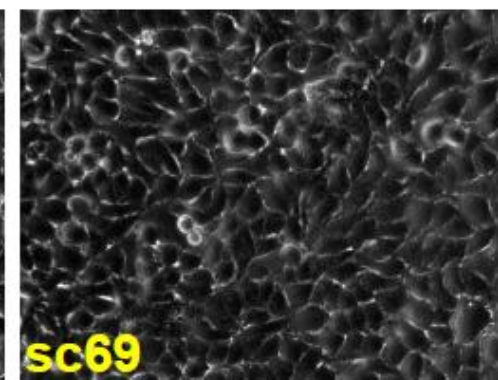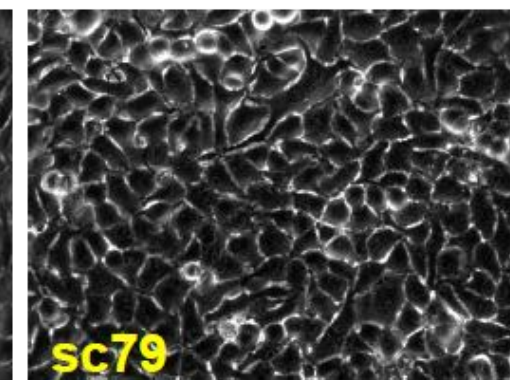



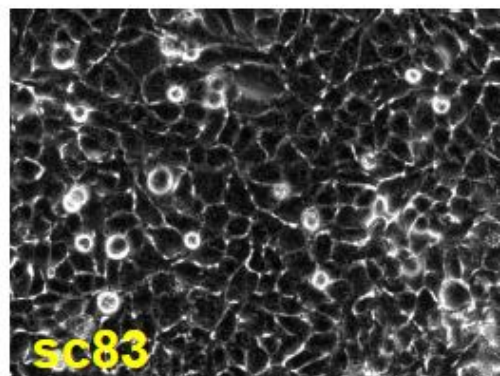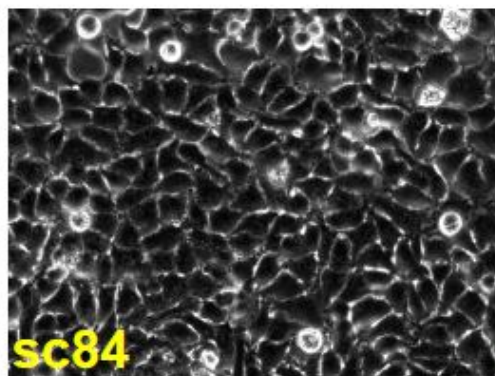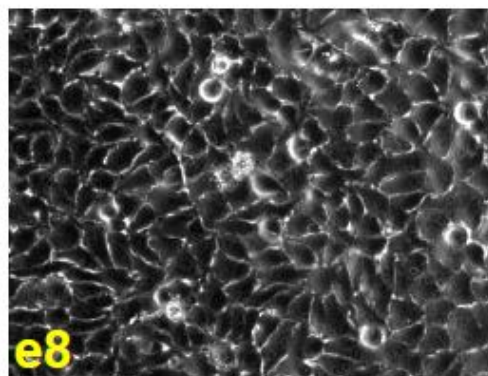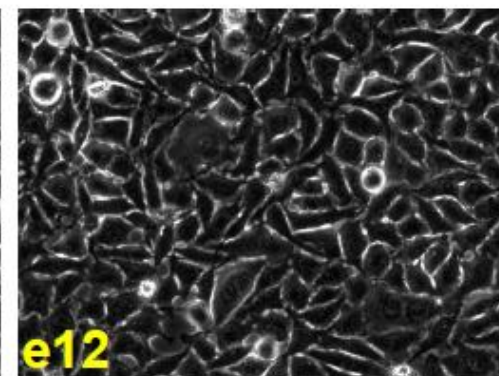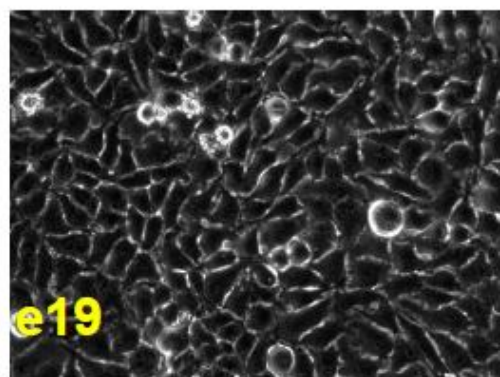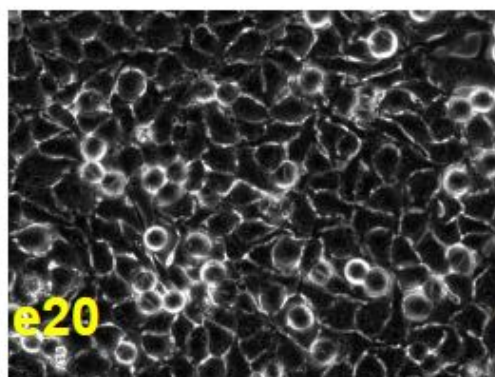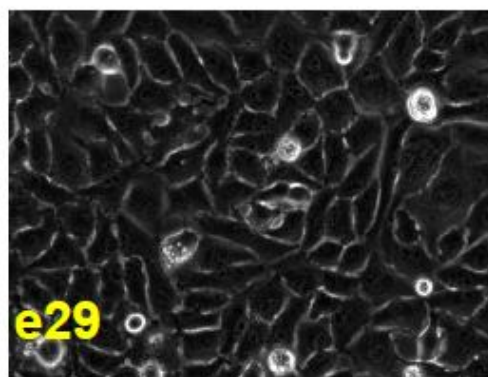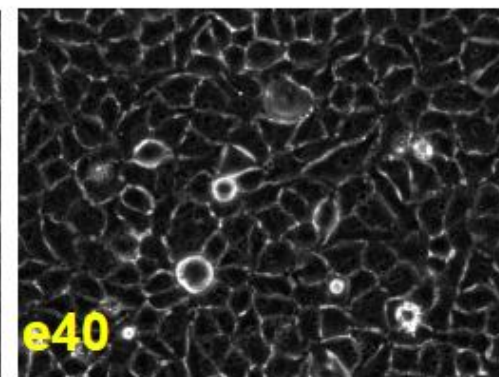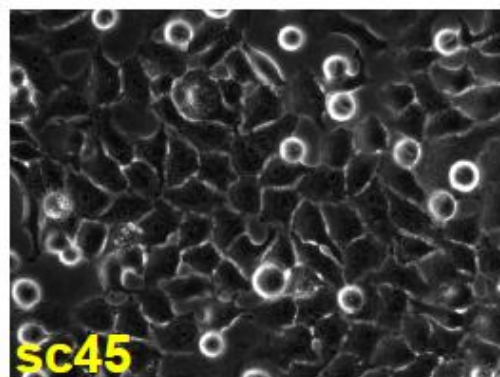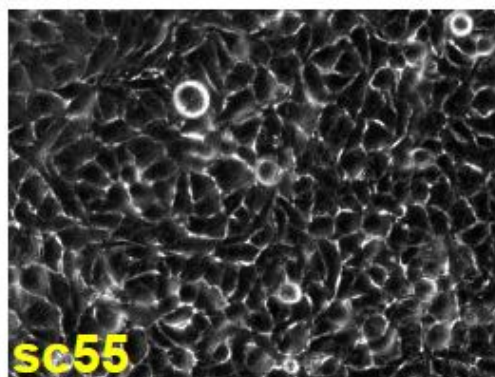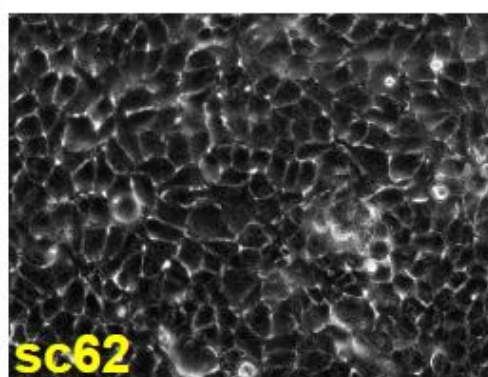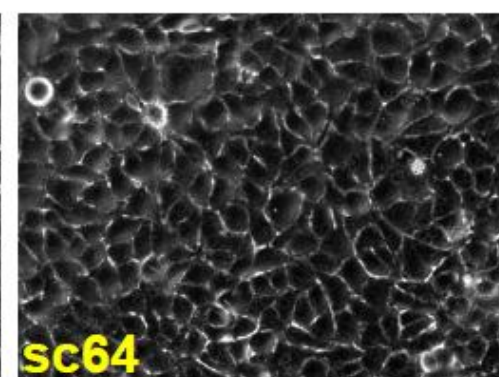



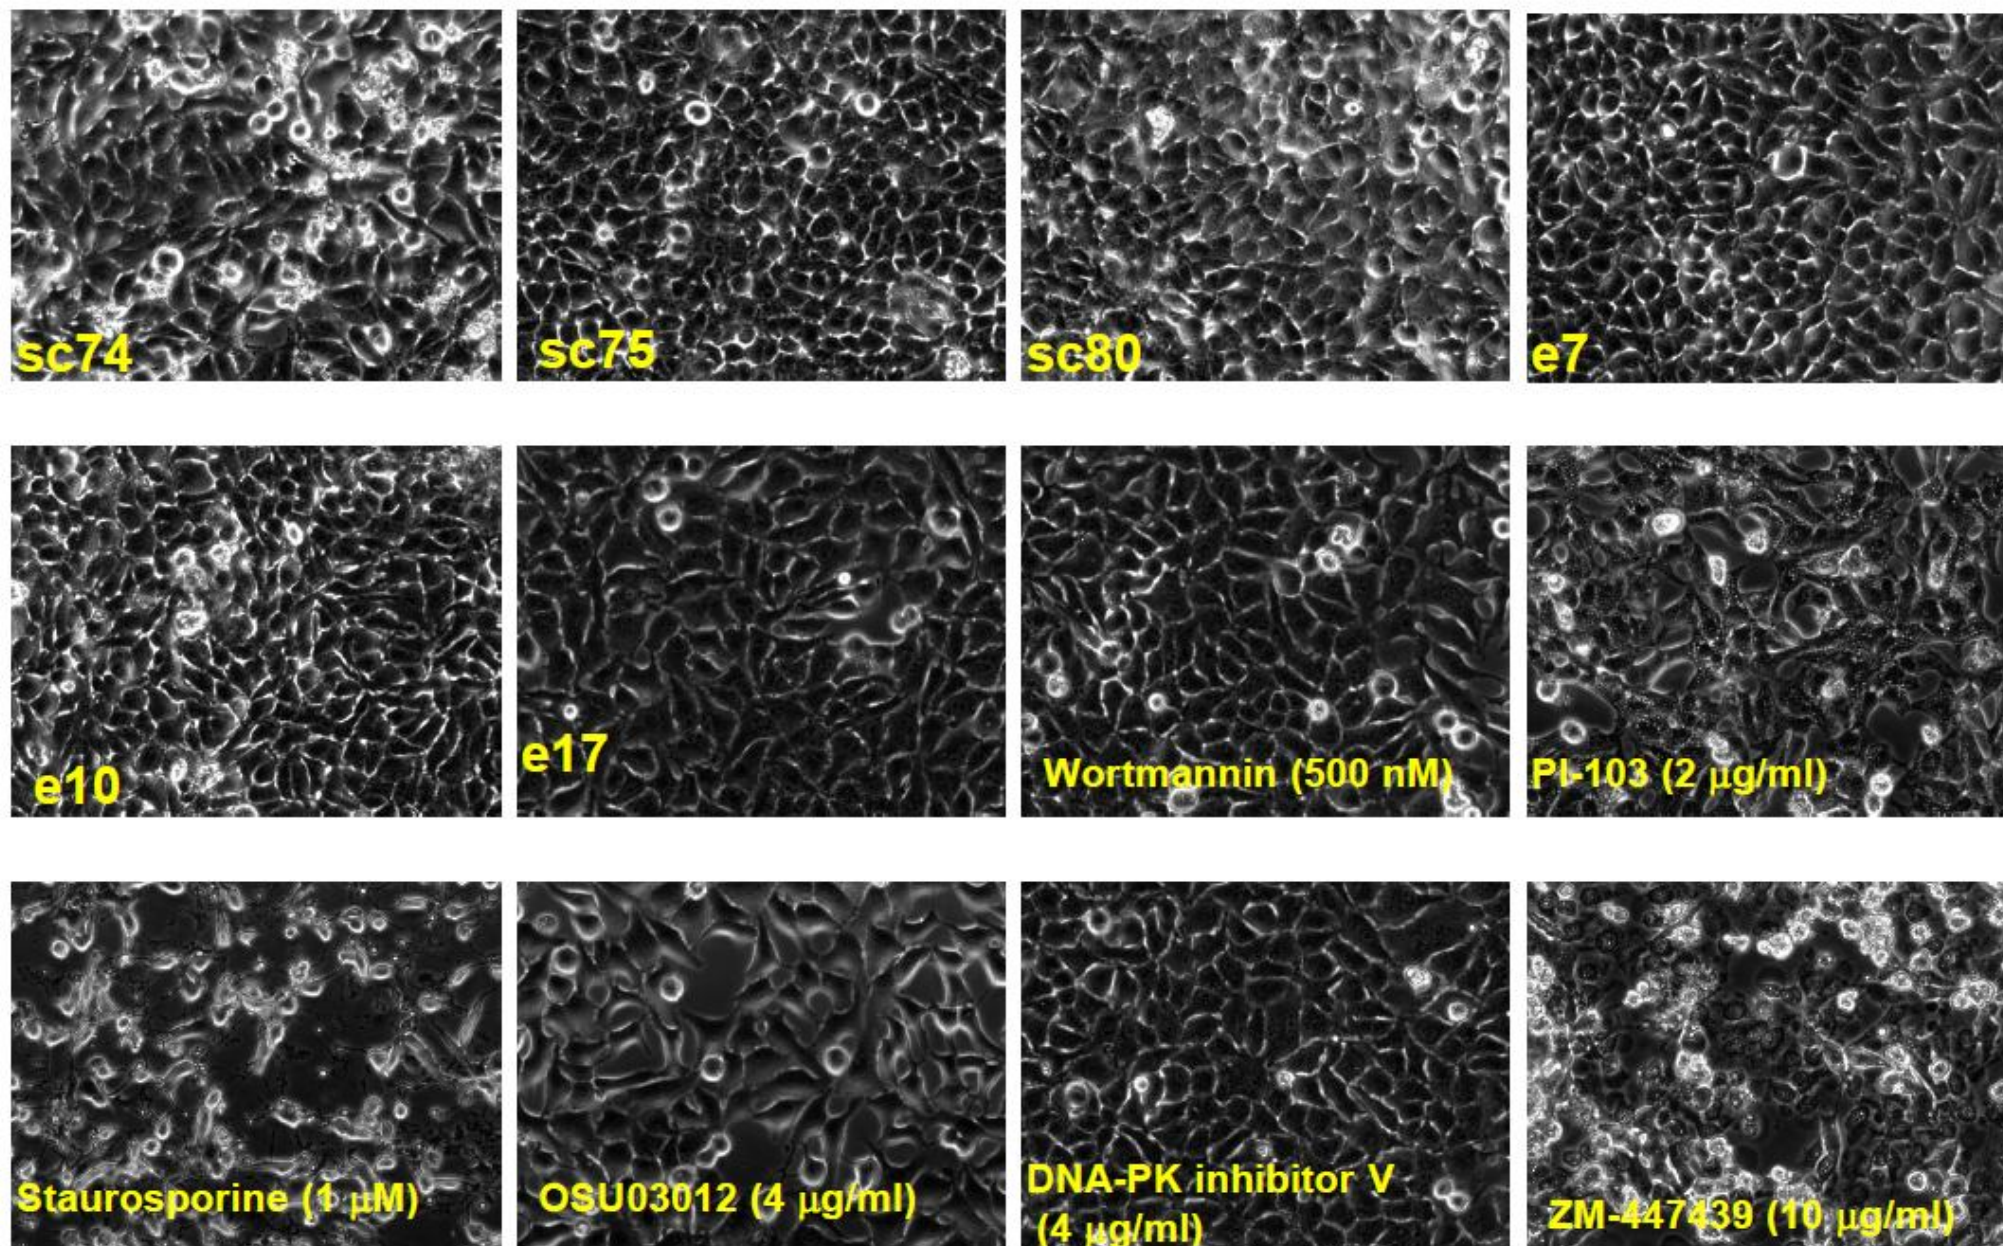

**Figure S9.** Morphological changes induced by identified positive hit compounds. HeLa cells were cultured in 24-well plate and treated with each compound (8  $\mu\text{g/ml}$ ) for indicated time. The bright field images were taken at each time points following chemical treatment. The compounds that induced significant morphological changes in 6 hrs are indicated in red. Cells were also treated with several known kinase inhibitors, including Wortmannin (PI3K inhibitor), PI-103 (PI3K and mTor kinase inhibitor), Staurosporine (broad-spectrum protein kinases inhibitor), OSU-0312 (Aurora kinase inhibitor), DNA-PK inhibitor V, and ZM447439 (PDK1 inhibitor) at the indicated concentrations.

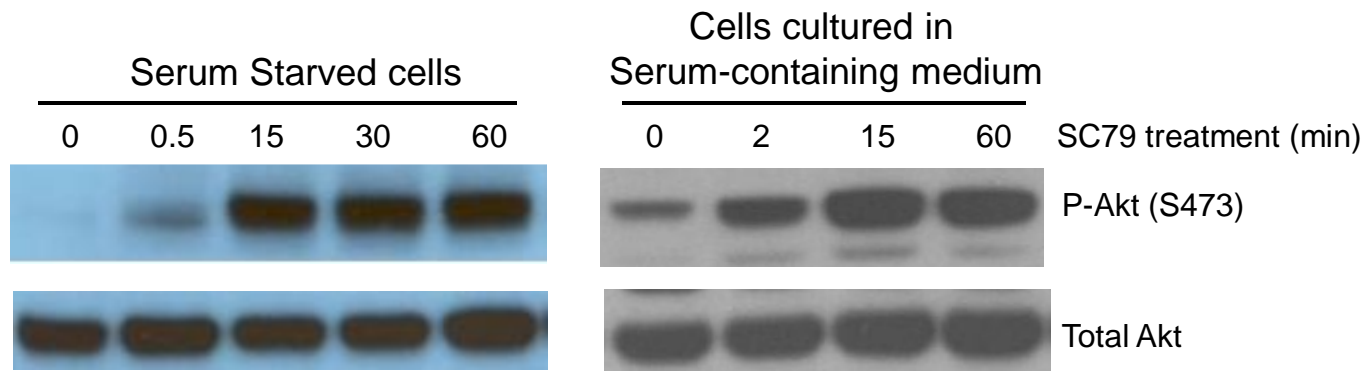

**Figure S10. Kinetics of Akt phosphorylation by SC79.** Serum-starved cells (overnight) or cells grown in serum-containing medium (1% FBS) were treated with SC79 (4mg/ml) for indicated time. Total and phosphorylated Akt were detected by Western blot using anti-Akt and anti-Phospho-Akt (Ser473) antibodies, respectively.



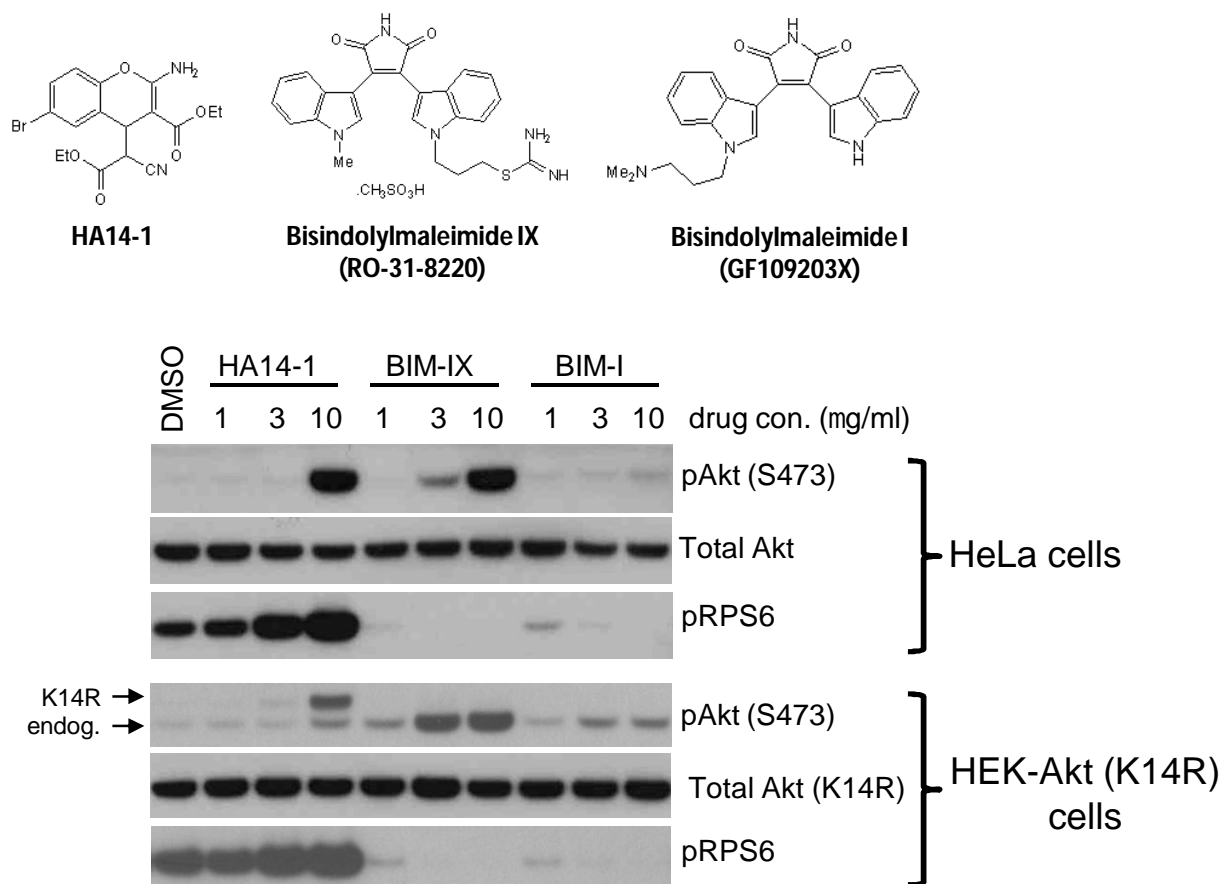

**Figure S11.** HA14-1, a structural analog of SC79, increases phosphorylation of both endogenous and mutant Akt (K14R) and enhances Akt signaling. In contrast, BIM-IX and BIM-I, two kinase inhibitors of PKC, enhance phosphorylation of endogenous Akt but inhibit its kinase activity. Both PKC and Akt belong to AGC family kinases with a similar kinase domain. HeLa or HEK-Akt (K14R) cells were treated with the indicated amounts of chemicals for 30 minutes. The levels of phosphorylation of Akt and RPS6 (ribosomal protein S6), a target of AGC family kinase, were analyzed by Western blot.

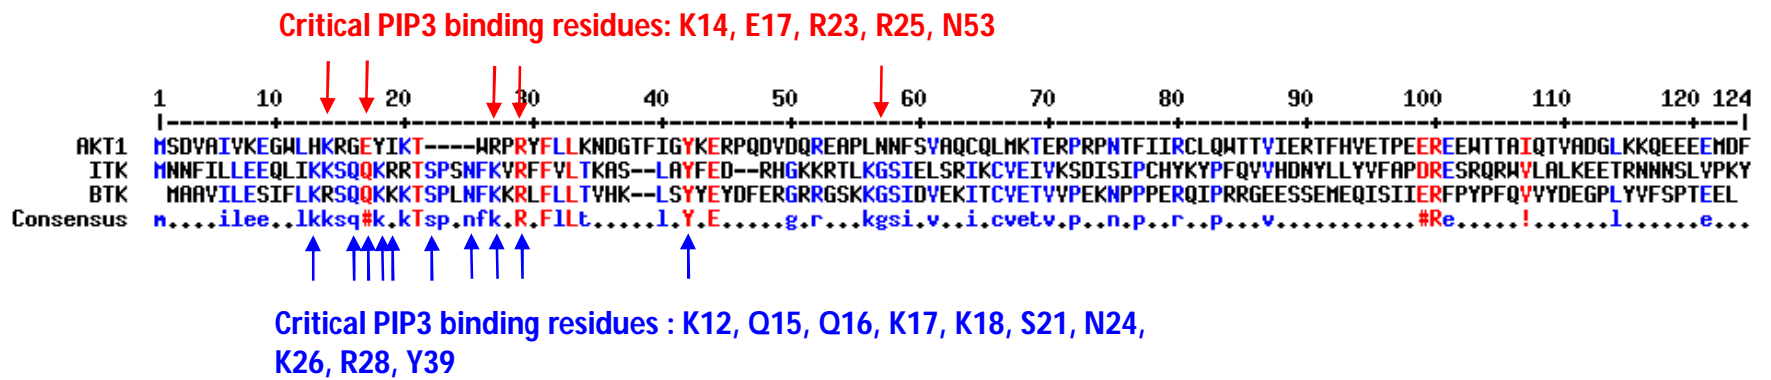

**Figure S12.** Alignment of PH domains of Akt and Tec family tyrosine kinase (Itk and Btk). The critical residues for PtdIns(3,4,5)P3 binding were indicated by arrows.

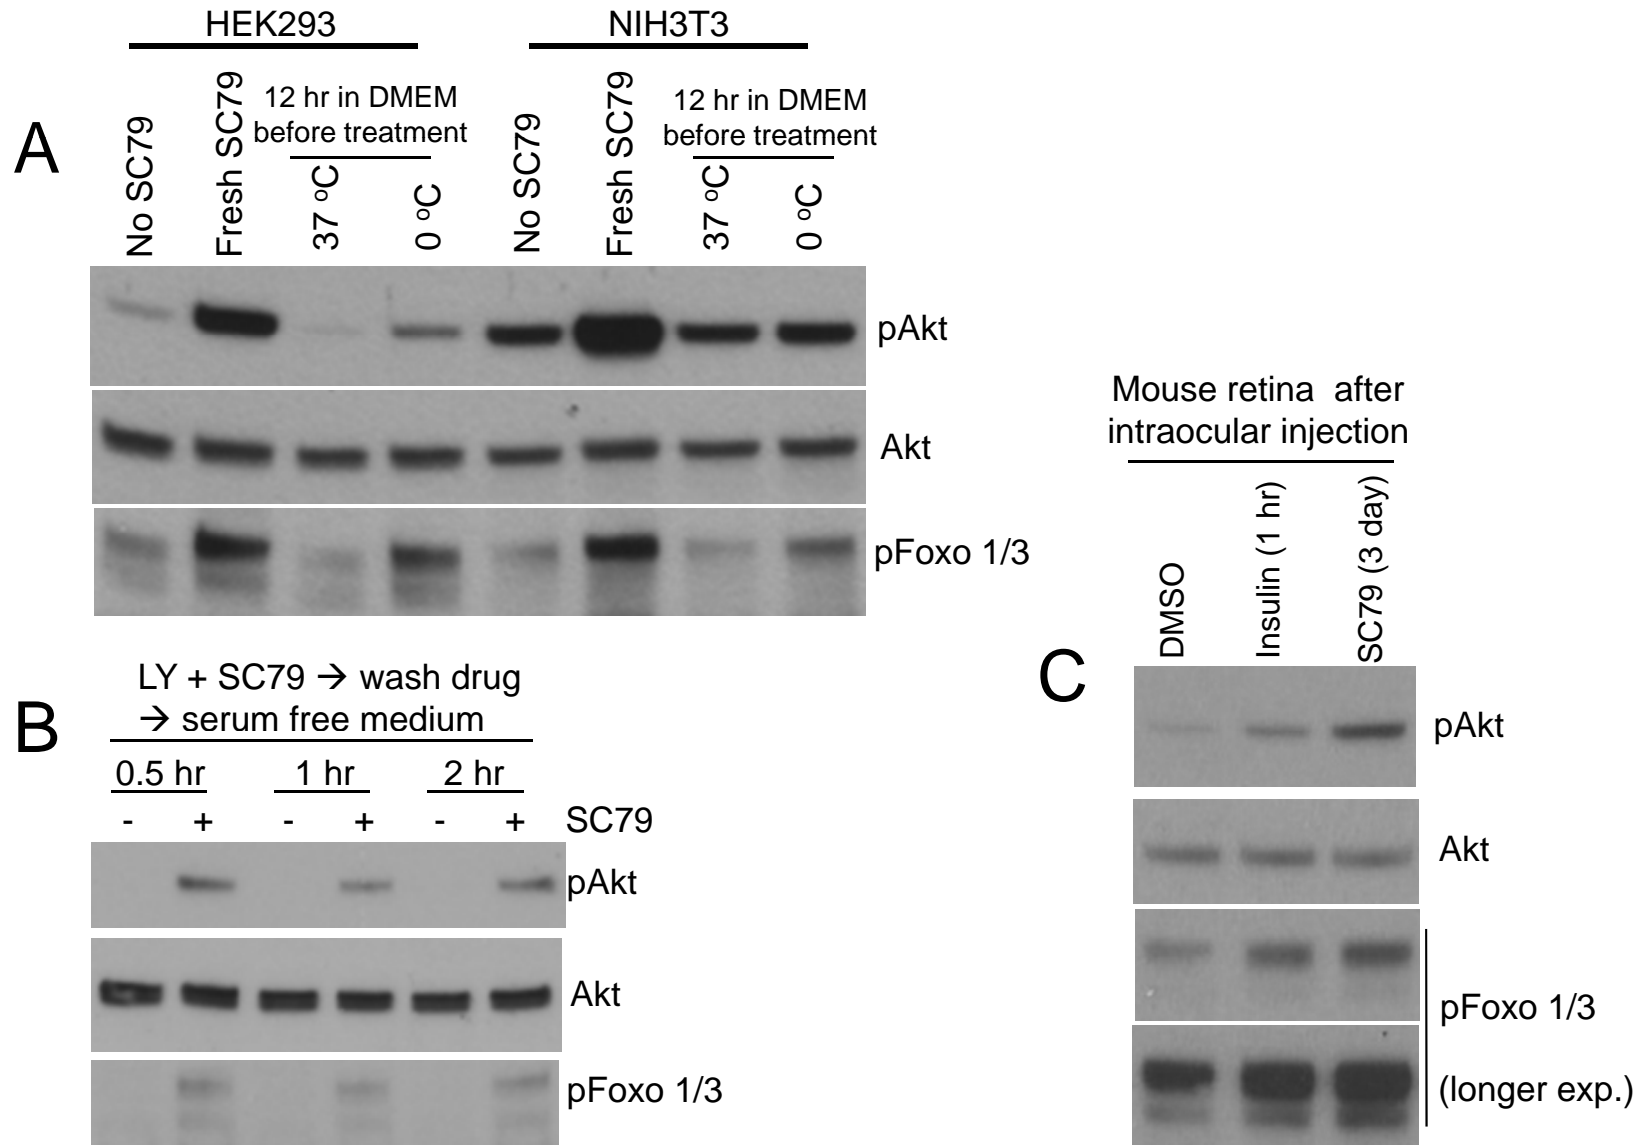

**Figure S13. A sustained Akt activity after removal of SC79.** (A) Serum-deprived HEK293 or NIH3T3 cells were treated with fresh SC79 (4 mg/ml) or SC79 pre-incubated in aqueous medium for 12 hr at 37°C or on ice. The levels of pAkt and pFoxo were analyzed after 30 min-drug treatment. (B) HeLa cells were treated with LY294002 (40 μM) and SC79 (4μg/ml) for 30 min. After removal of drug, cells were left in serum free medium and the levels of pAkt and pFoxo were analyzed in time course. (C) SC79 (100ng) was intravitreally injected into mouse eyes and the level of pAkt and pFoxo was analyzed in the retina on day 3. The retina from 1 hour after insulin (100 ng) injection serves as a positive control for Akt activation.



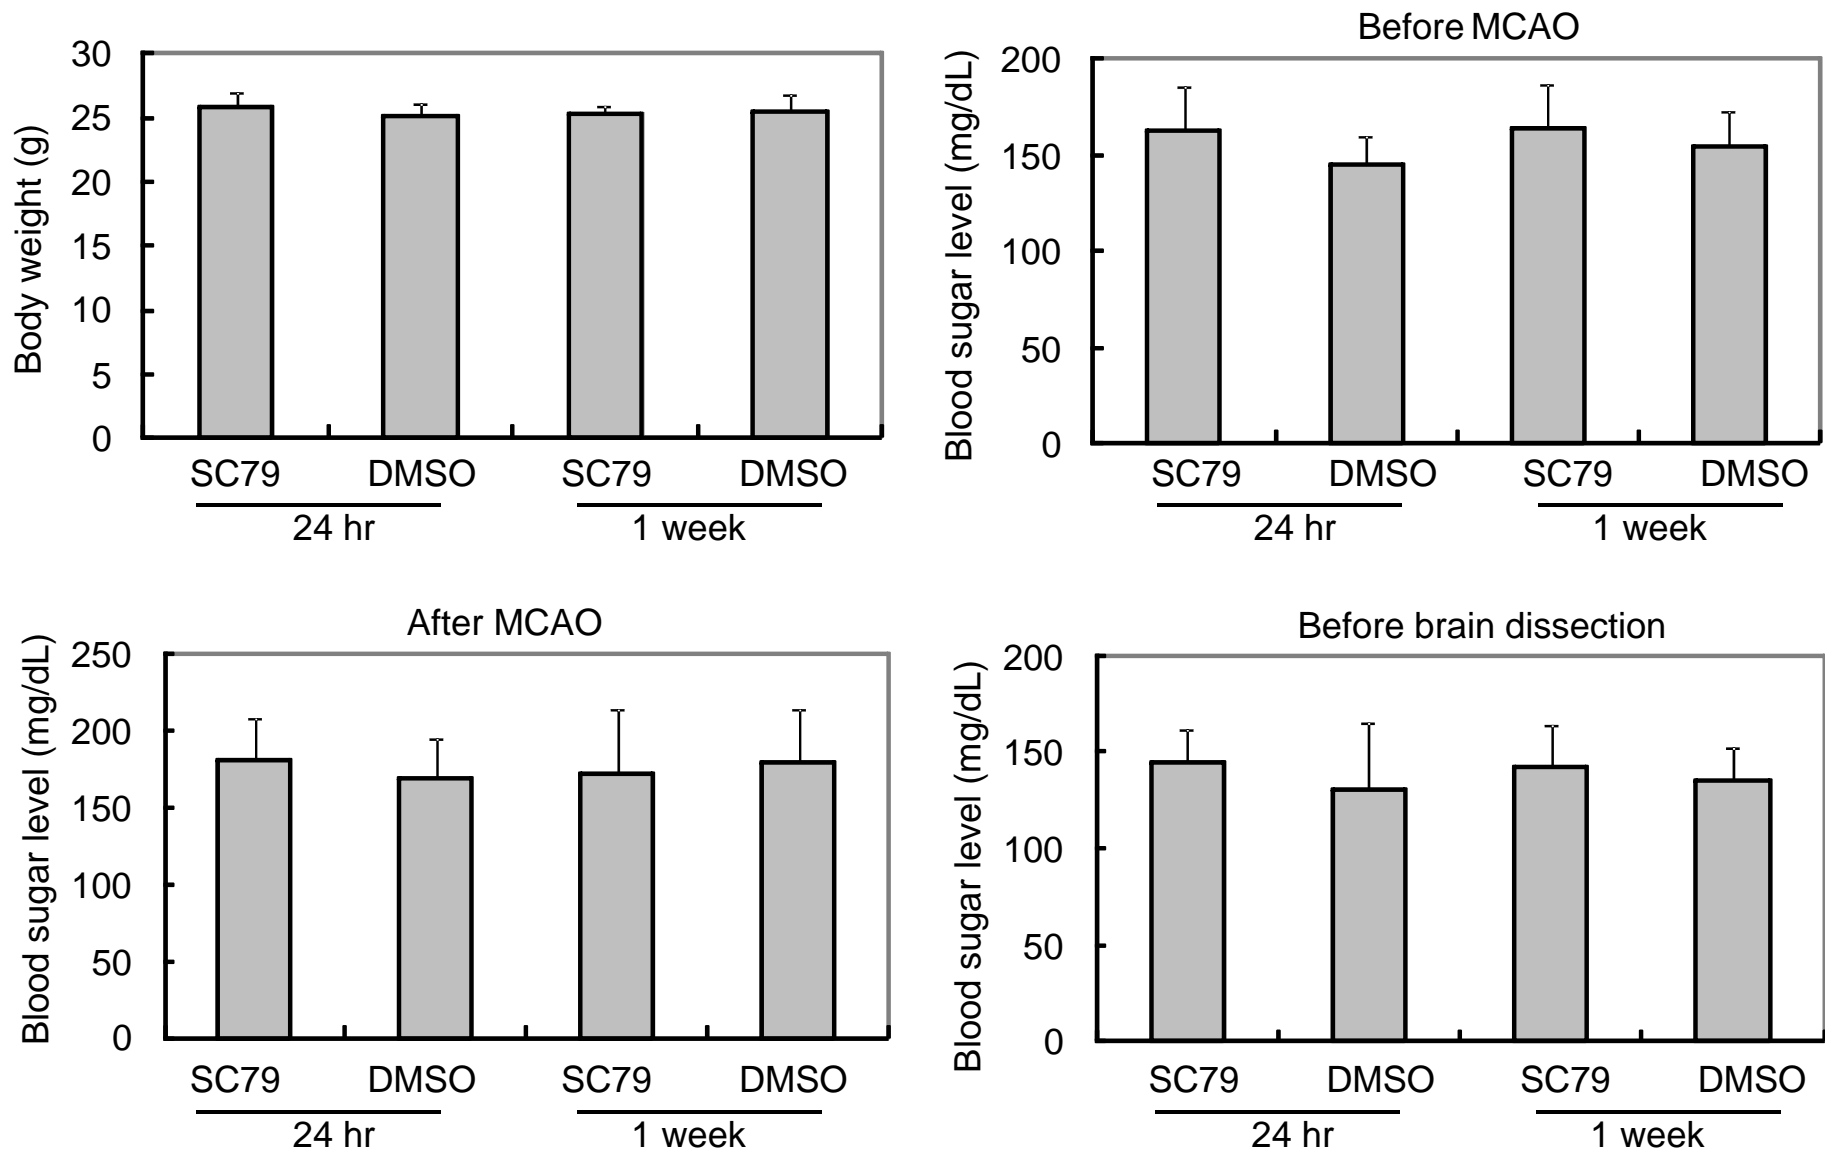

**Figure S14. SC79 treatment does not alter the body weight and blood sugar level in experimental animals.** SC79 was applied intravenously via tail vein injection at a concentration of 0.4 mg/g body weight. The body weight and blood sugar levels were measured at each indicated time points.
